# Supplementary material for: One-pot two-step synthesis of 3-iodo-4-aryloxy coumarins and their Pd/C-catalyzed annulation to coumestans
Source: PubMed Central journal article supplement — RSC Adv. 2018 Feb 16;8(14):7716–25. doi: 10.1039/c7ra12419h (PMC9078490; doi:10.1039/c7ra12419h), 2018-02-16

**Supporting Information**  
**One-pot two-step synthesis of 3-iodo-4-aryloxy coumarins and their Pd/C-catalyzed annulation to coumestans**

**Niranjana Panda,<sup>\*,[a]</sup> and Irshad Mattan<sup>[a]</sup>**

**<sup>[a]</sup>Department of Chemistry, National Institute of Technology Rourkela, Odisha 769008, India**

**Email: [npanda@nitrkl.ac.in](mailto:npanda@nitrkl.ac.in); [niranjana.panda@gmail.com](mailto:niranjana.panda@gmail.com)**

# <sup>1</sup>H of 3-iodo-4-phenoxy-2H-chromen-2-one (3aa)

<sup>1</sup>H of NP-IM-595 16.4.2015

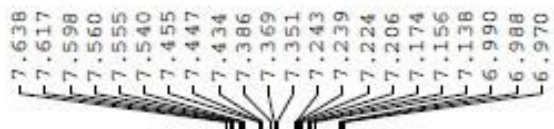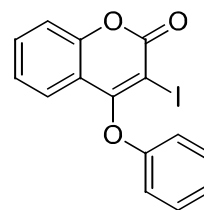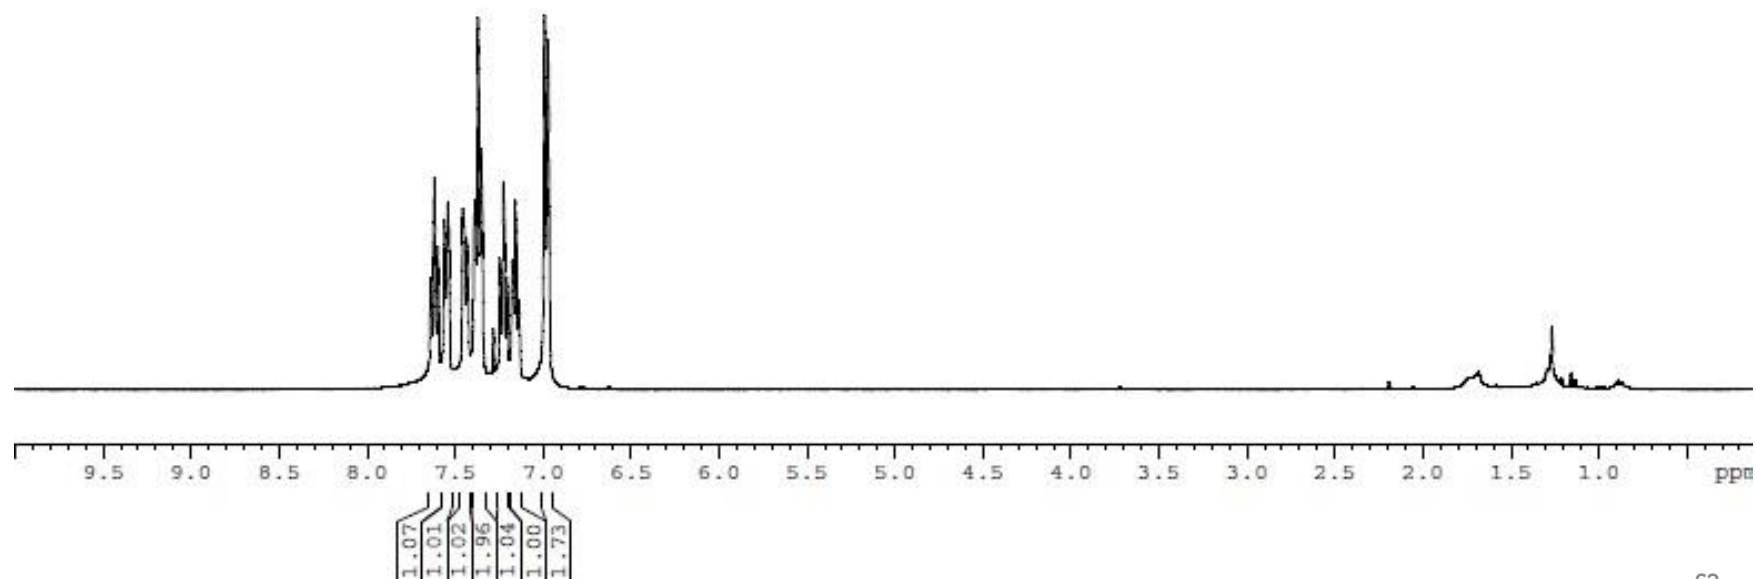

# $^{13}\text{C}$ of 3-iodo-4-phenoxy-2H-chromen-2-one (3aa)

$^{13}\text{C}$  of NP-IM-595 16.4.2015

164.99  
159.60  
155.40  
153.32

133.10  
130.15  
124.66  
123.86  
123.76  
116.88  
116.19  
115.89

80.54  
77.35  
77.03  
76.71

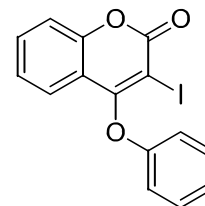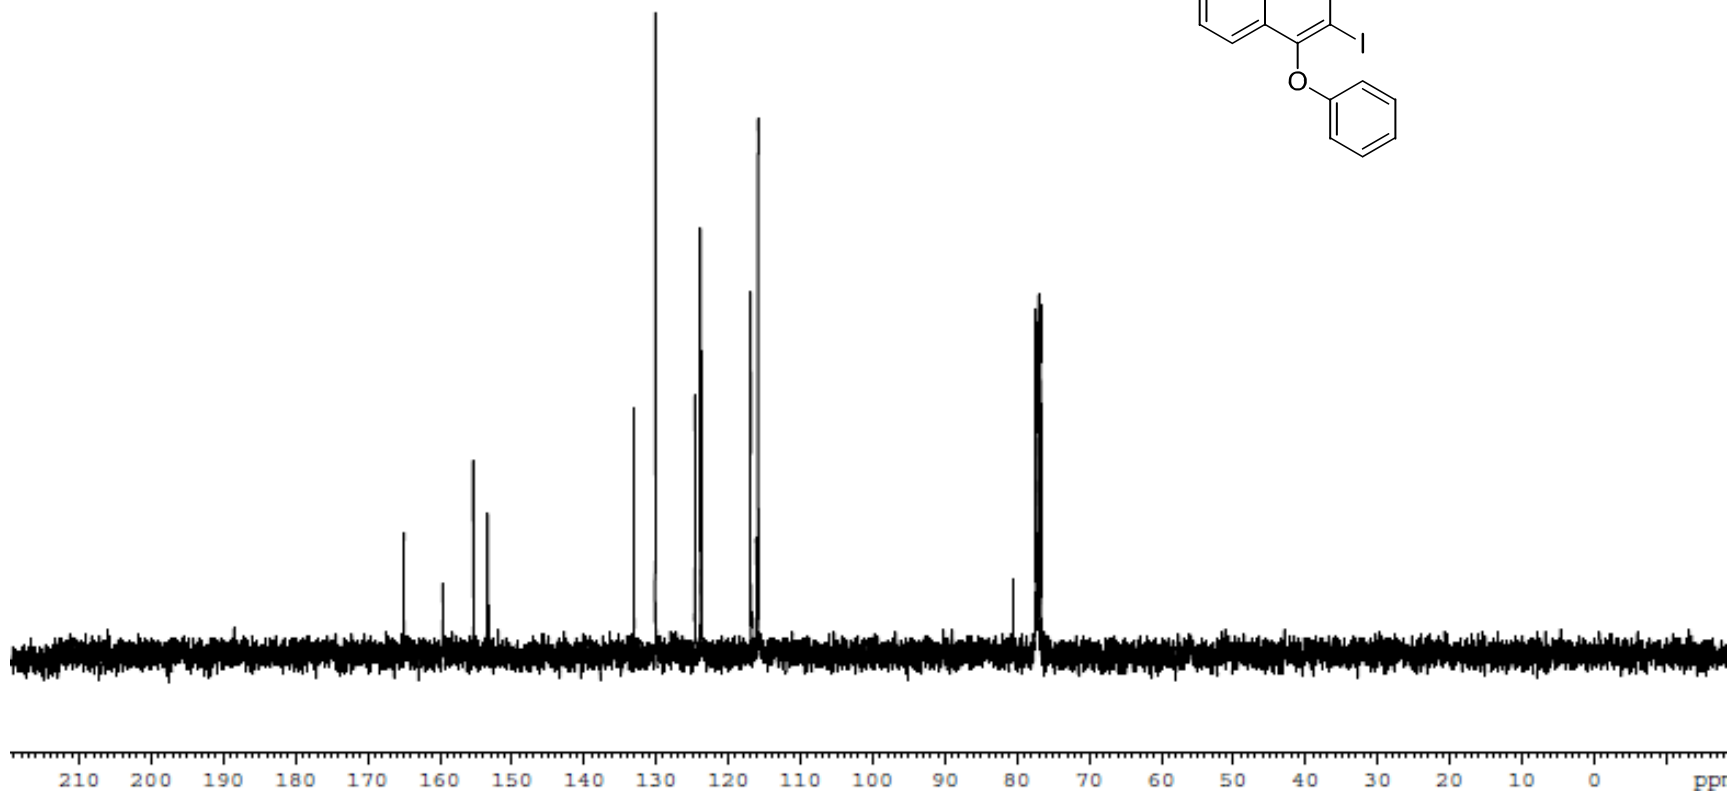

<sup>1</sup>H of 3-iodo-8-methyl-4-phenoxy-2H-chromen-2-one (3ab)

NP-IM-974

1H

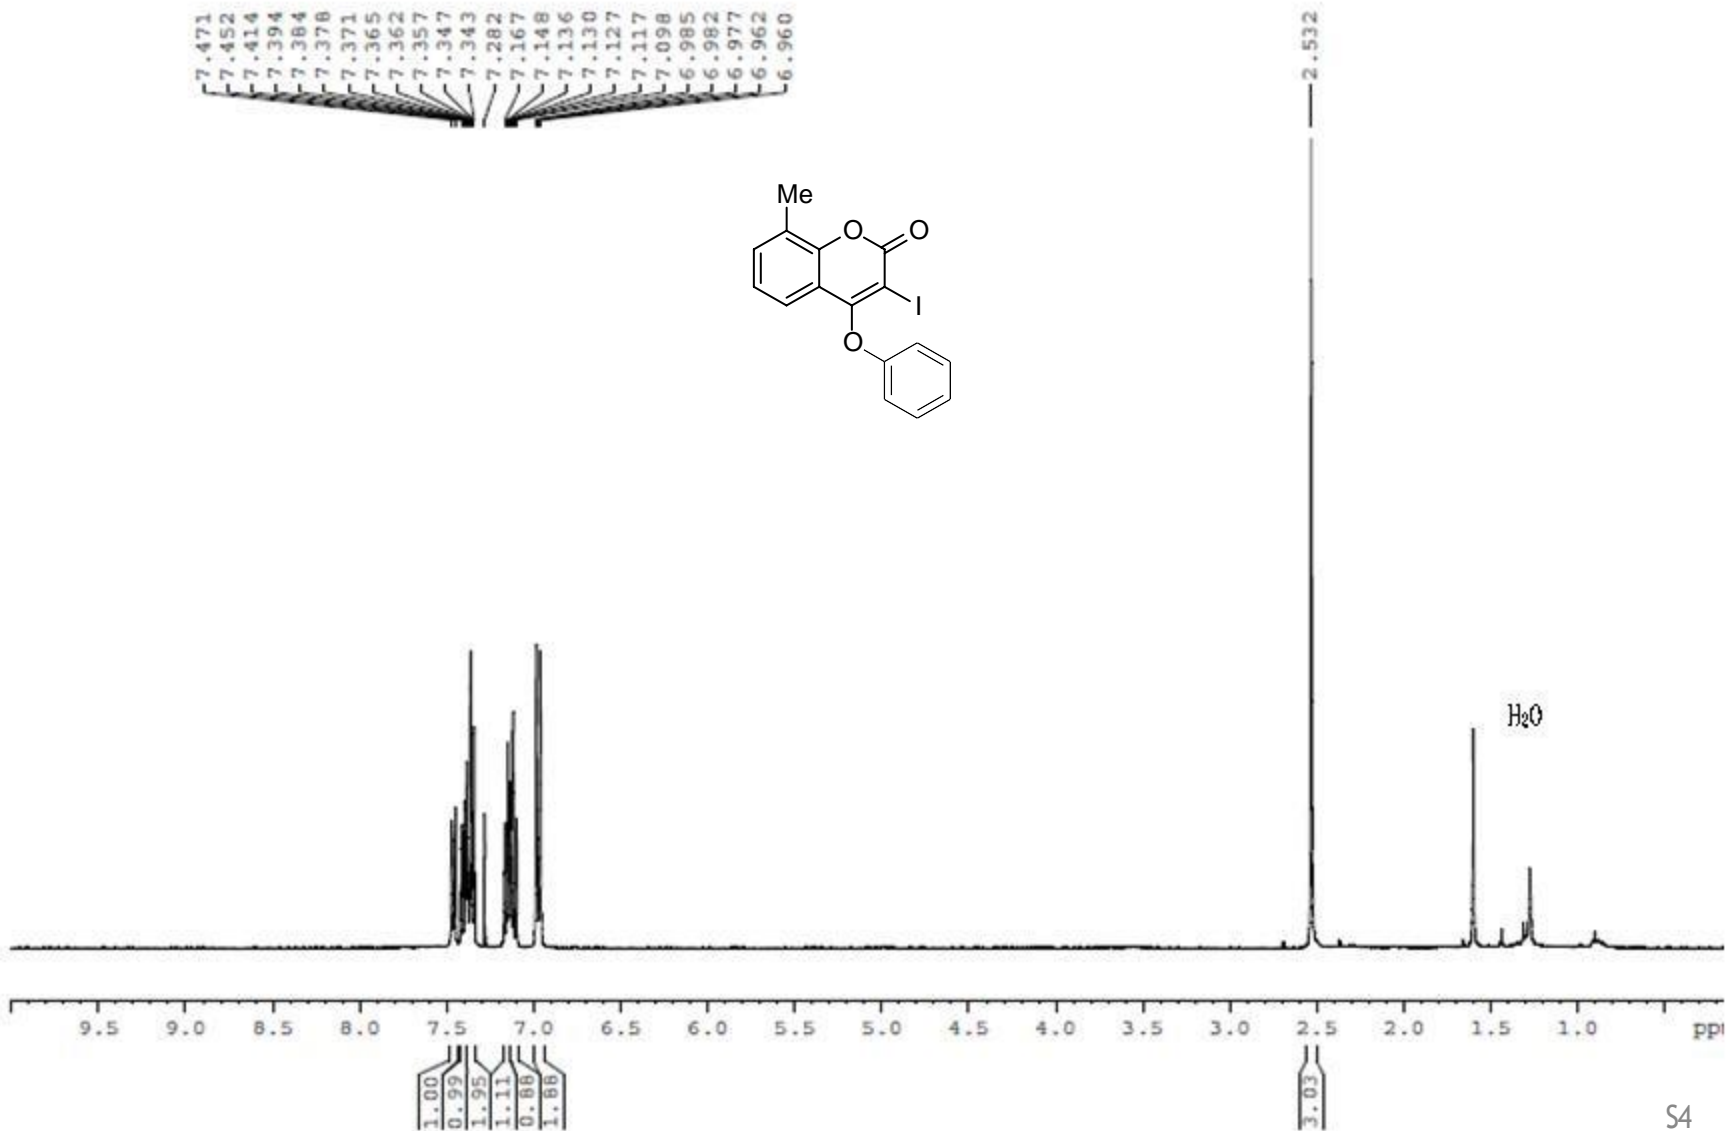

# <sup>13</sup>C of 3-iodo-8-methyl-4-phenoxy-2H-chromen-2-one (3ab)

NP-IM-974

<sup>13</sup>C

165.36  
159.65  
155.62  
151.81

134.39  
130.13  
126.60  
124.21  
123.65  
121.60  
116.16  
115.91

80.33  
77.34  
77.02  
76.70

15.72

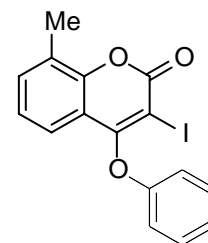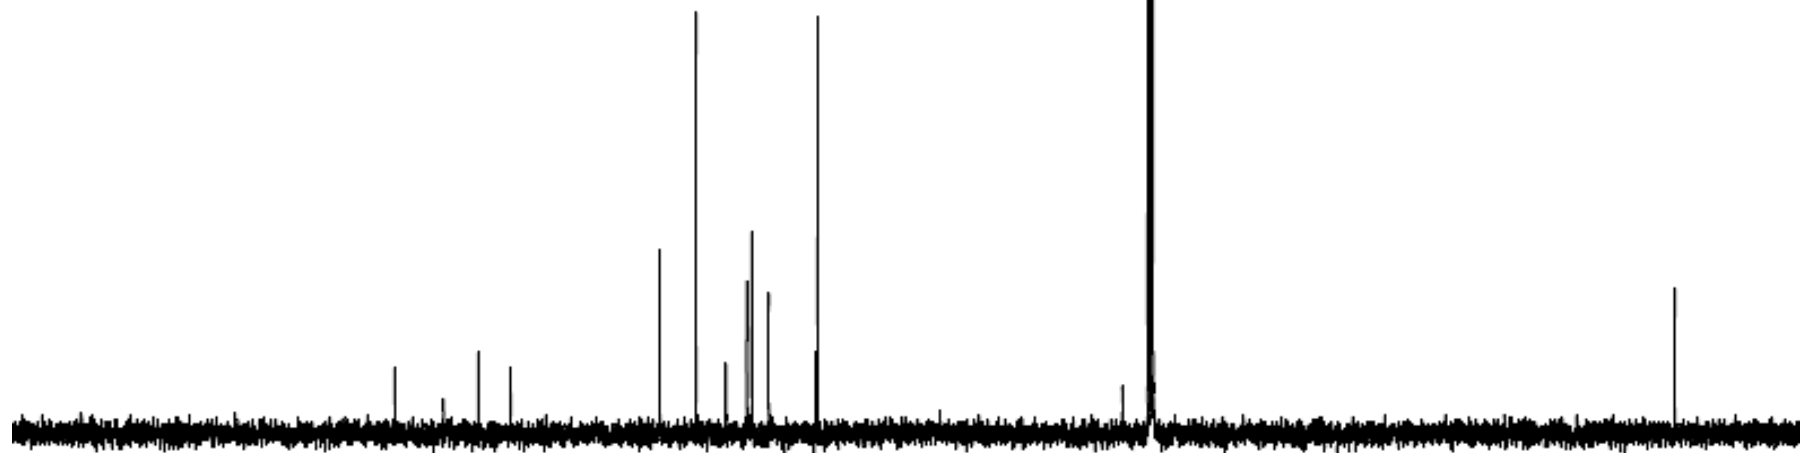

200 190 180 170 160 150 140 130 120 110 100 90 80 70 60 50 40 30 20 10 ppm

# <sup>1</sup>H of 3-iodo-6-methyl-4-phenoxy-2H-chromen-2-one (3ac)

<sup>1</sup>H of NP-IM-4-Me H.C-O-Ar 27.5.2016

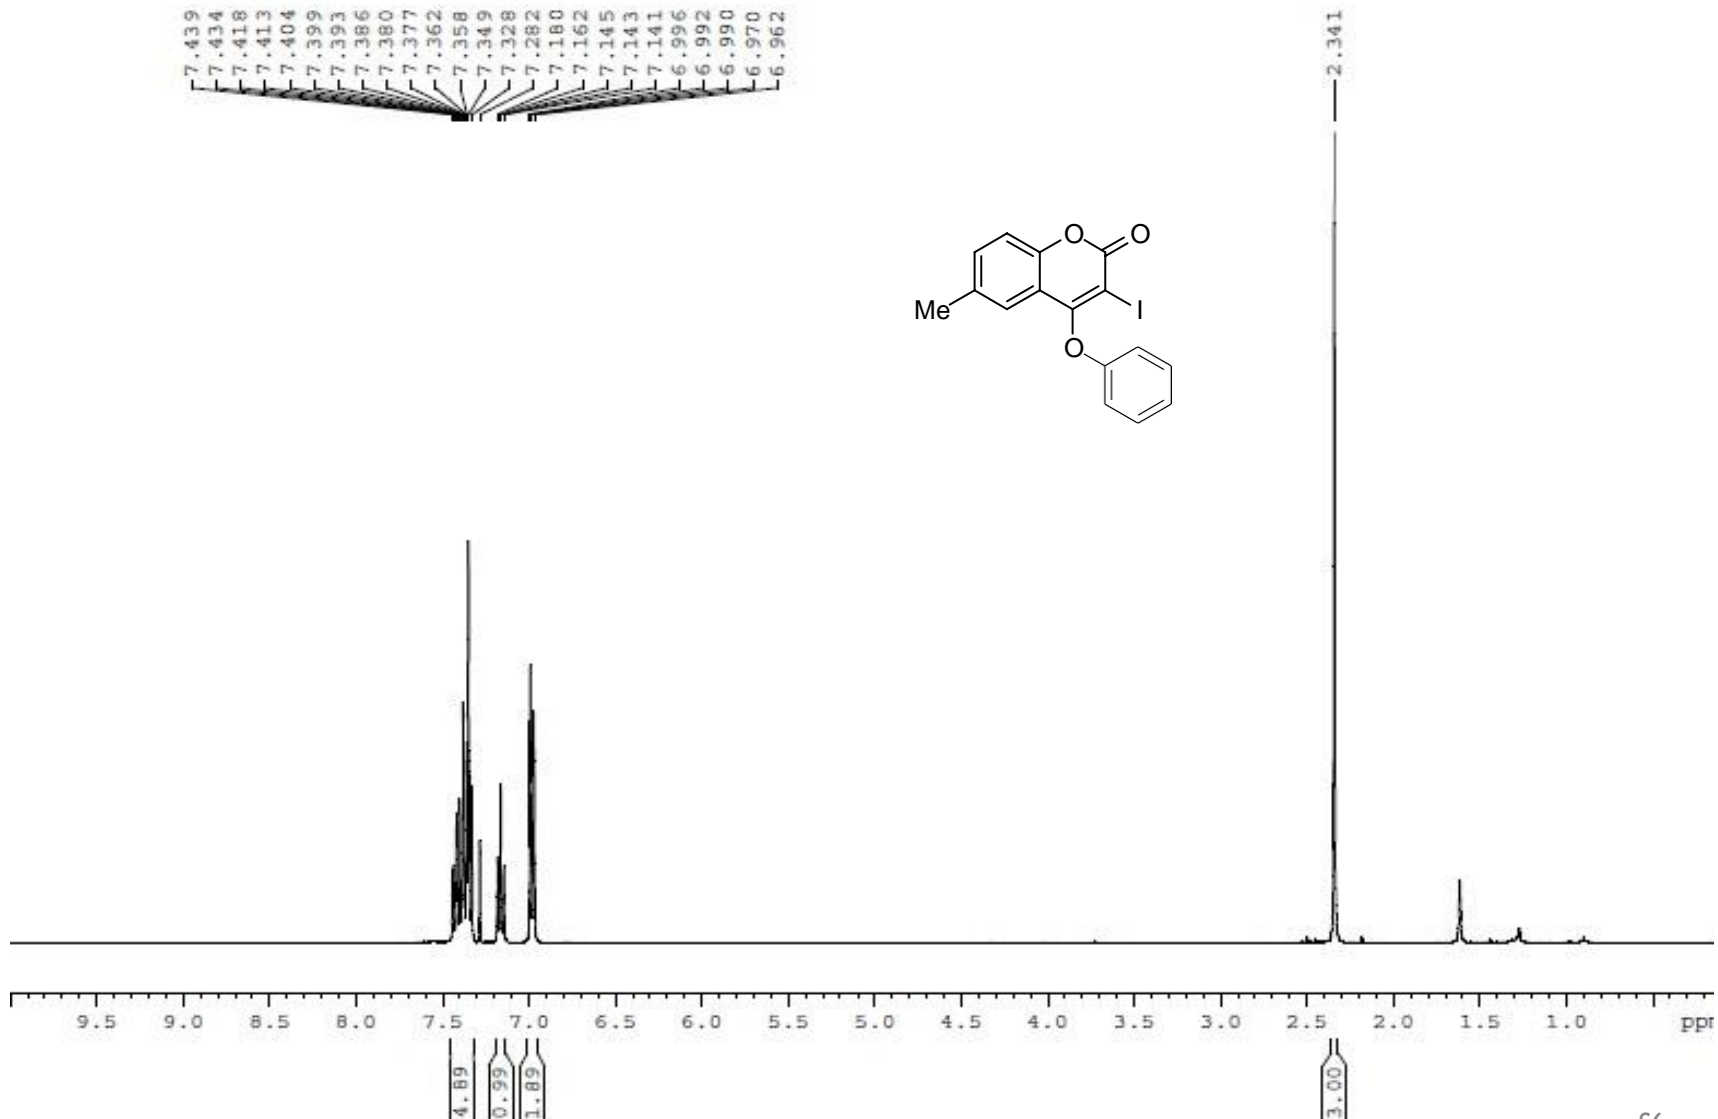

# <sup>13</sup>C of 3-iodo-6-methyl-4-phenoxy-2H-chromen-2-one (3ac)

13C of NP-IM-4-Me HC O-Ar 27.5.2016

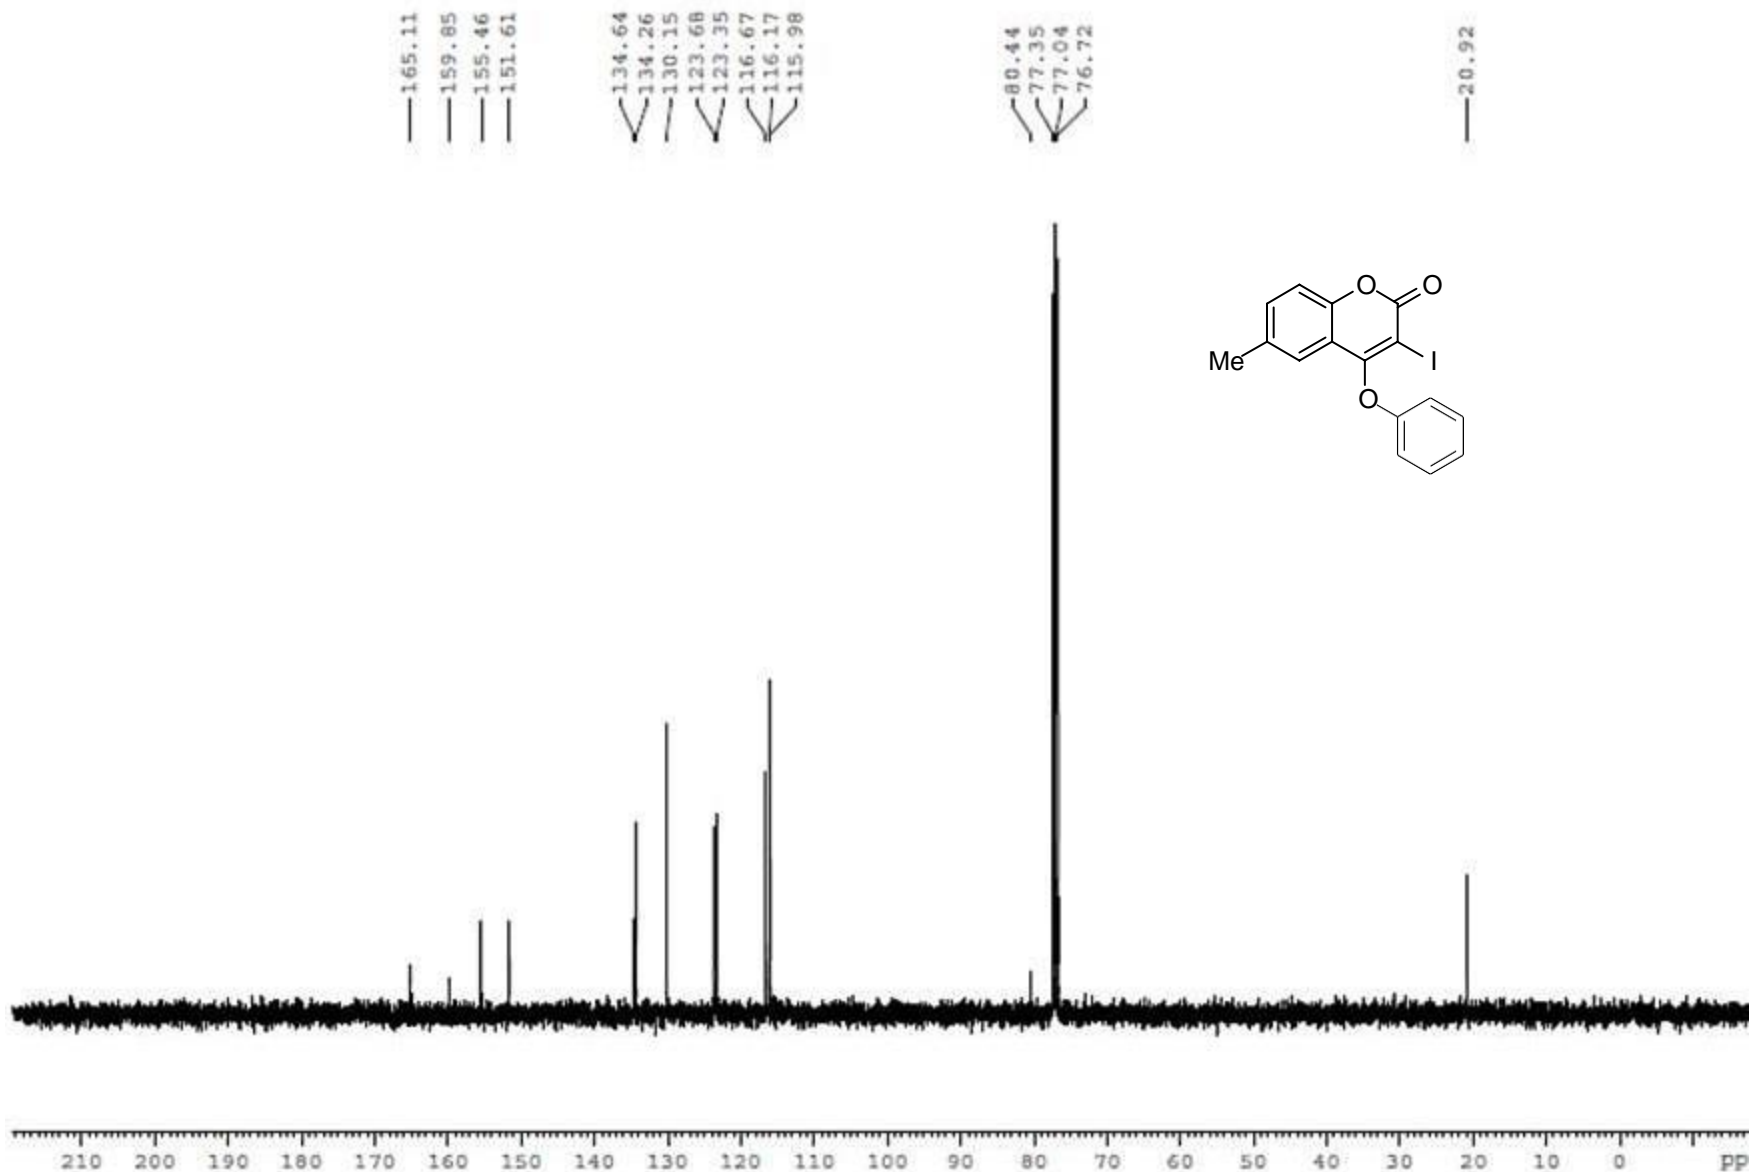

<sup>1</sup>H of 6-chloro-3-iodo-4-phenoxy-2H-chromen-2-one (3ad)

NP-IM-977

1H

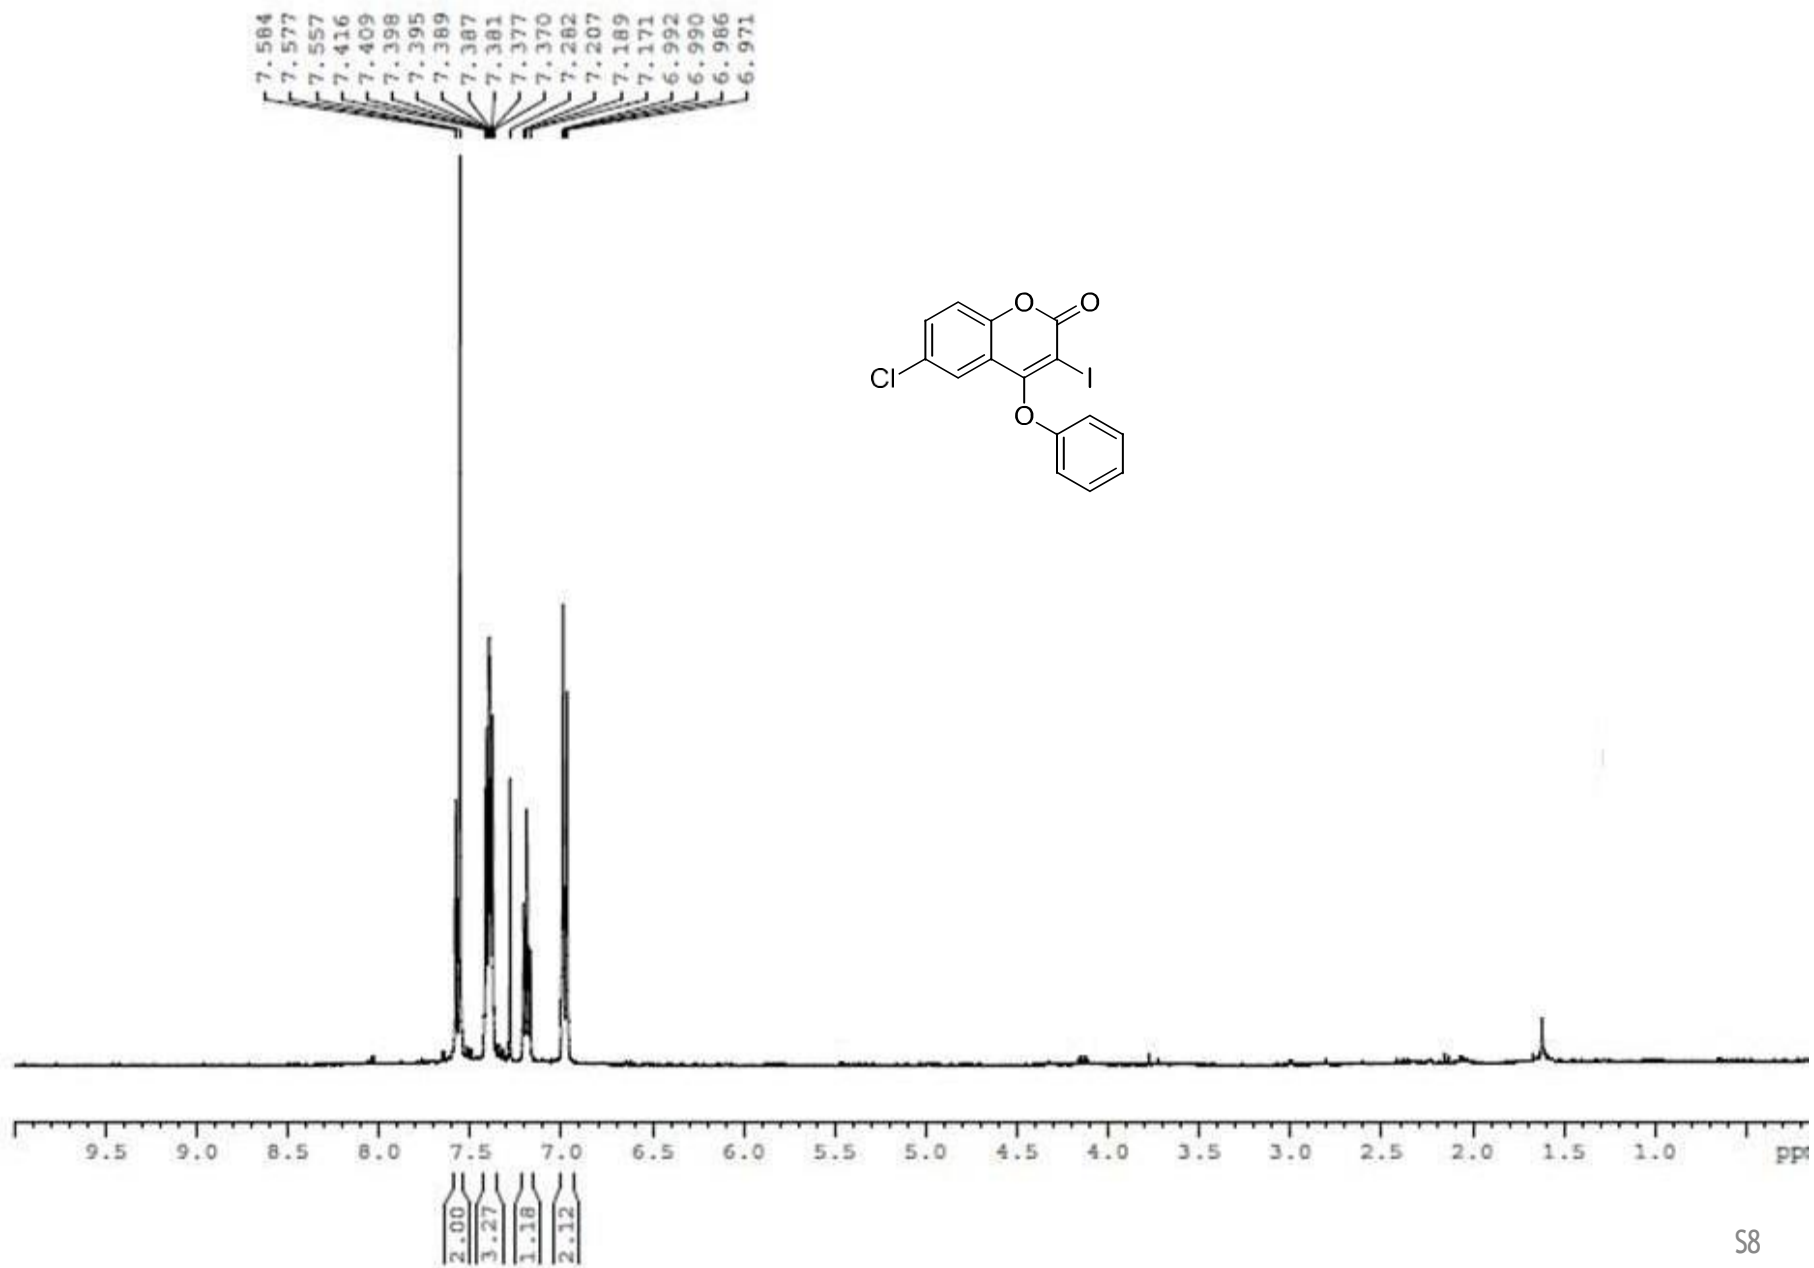



<sup>13</sup>C of 6-chloro-3-iodo-4-phenoxy-2H-chromen-2-one (3ad)

NP-IM-977 13C

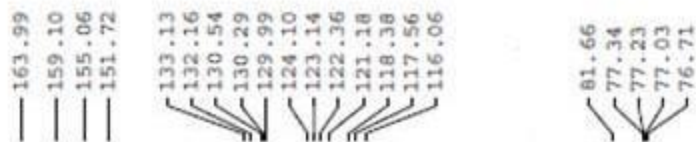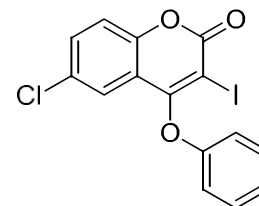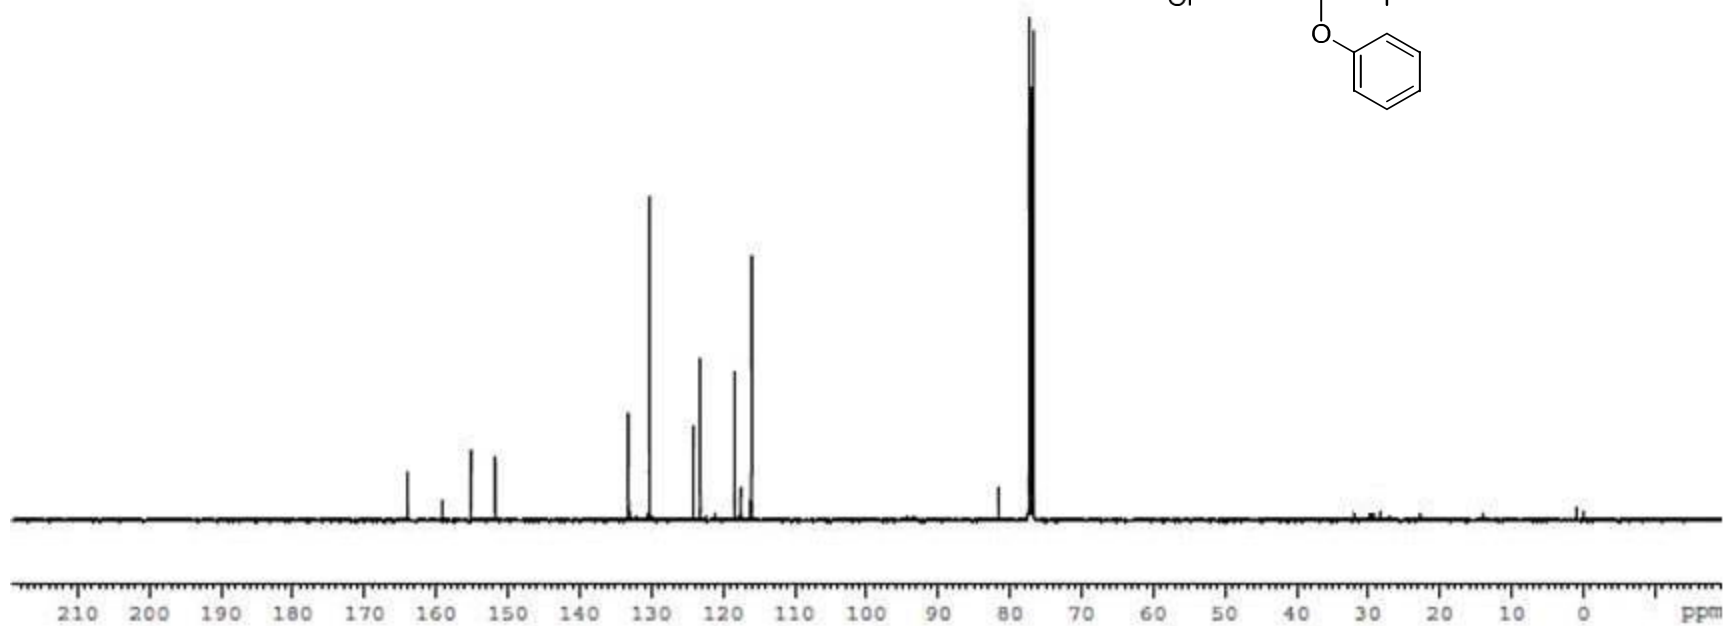

# <sup>1</sup>H of 3-iodo-7-methoxy-4-phenoxy-2H-chromen-2-one (3ae)

<sup>1</sup>H of NP-IM-1298

18.1.2017

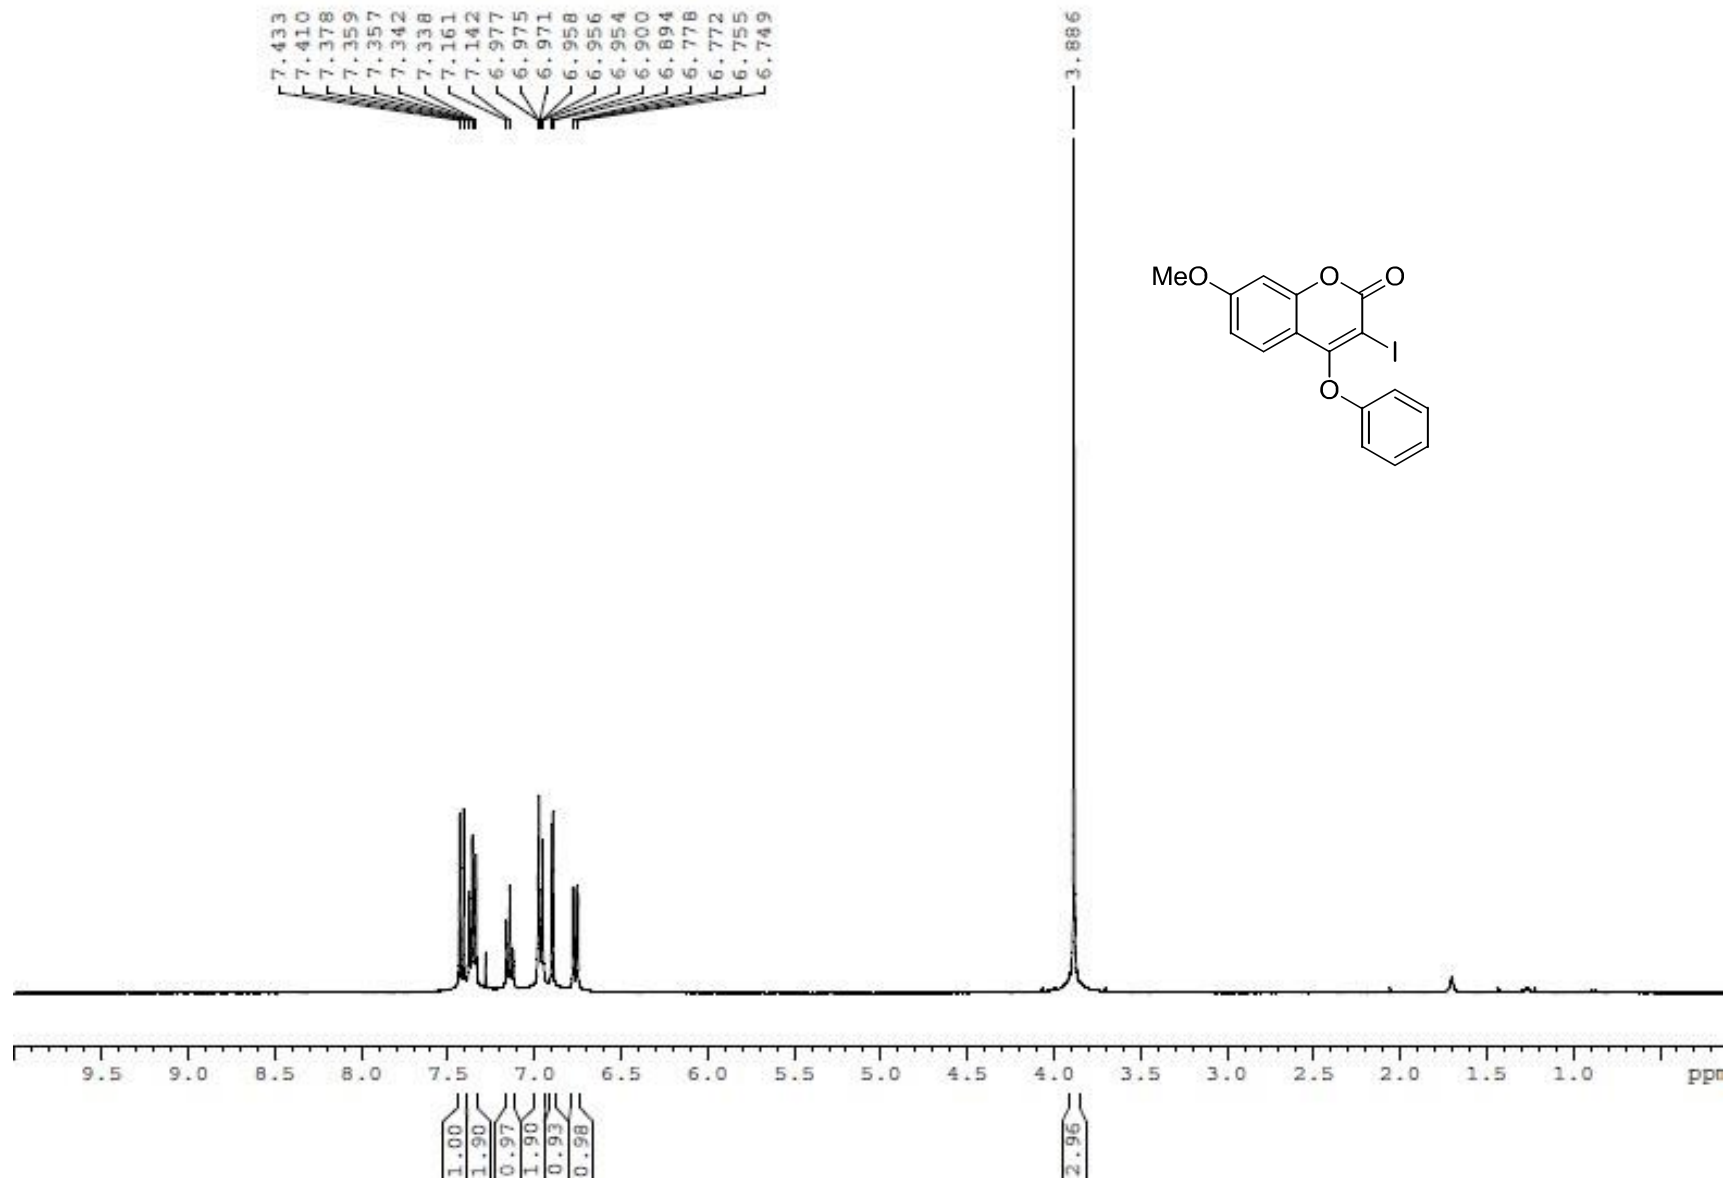

# <sup>13</sup>C of 3-iodo-7-methoxy-4-phenoxy-2H-chromen-2-one (3ae)

<sup>13</sup>C of NP-IM-1298

18.1.2017

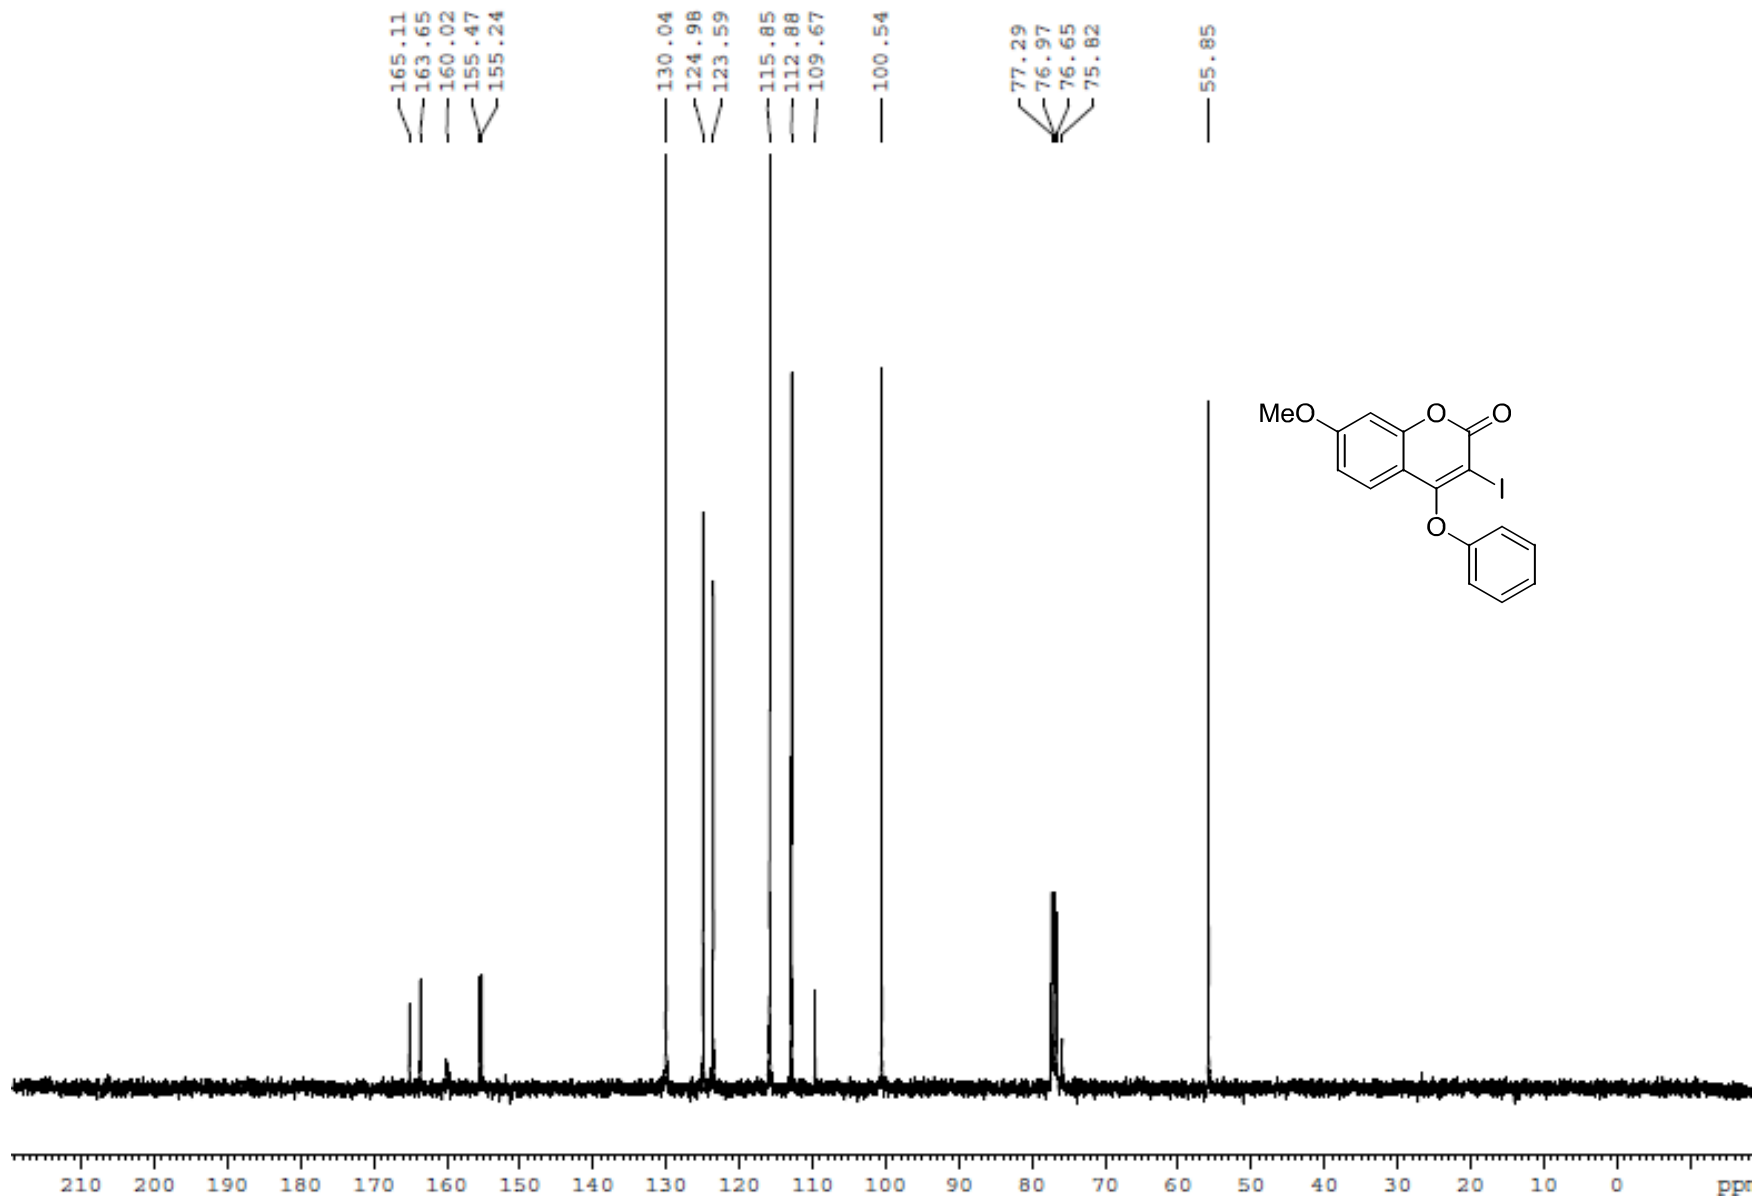

# <sup>1</sup>H of 3-iodo-6-methoxy-4-phenoxy-2H-chromen-2-one (3af)

<sup>1</sup>H of NP-Im-1254

24.1.2017

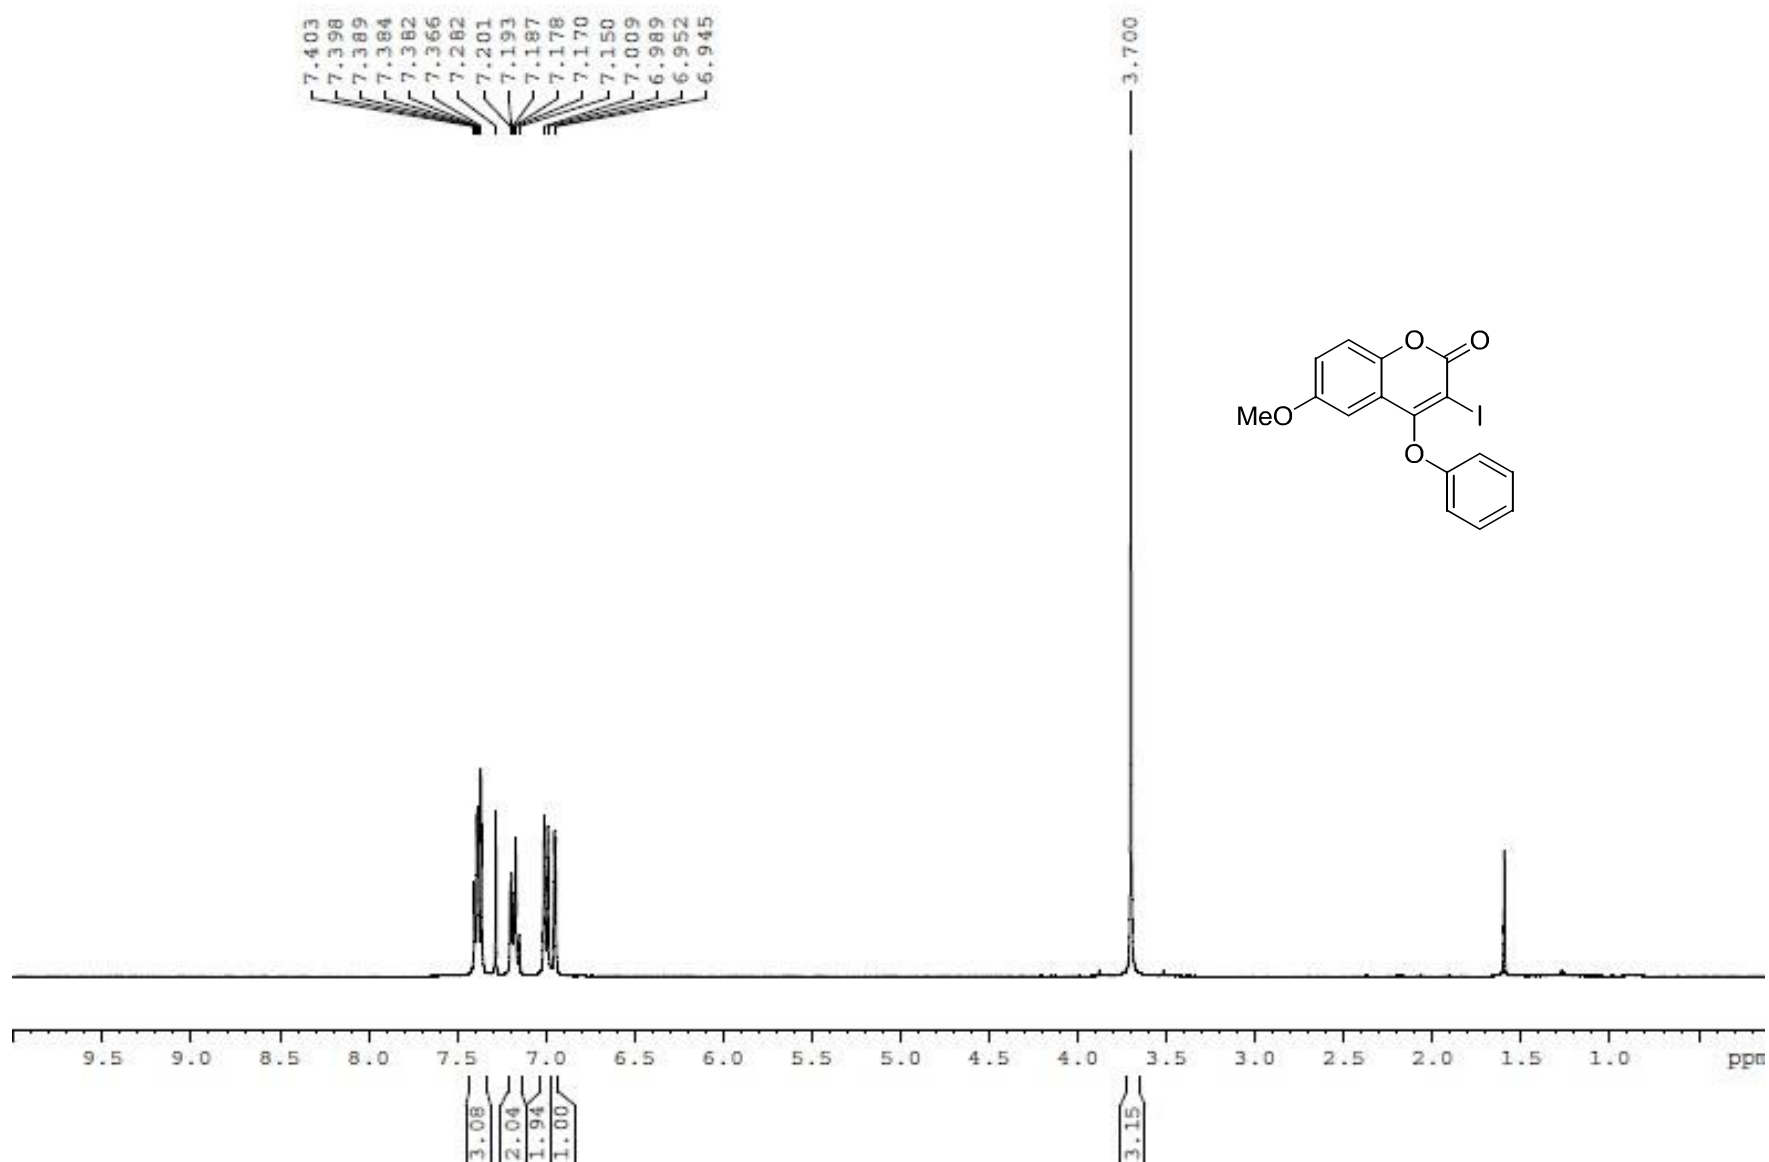

# 13C of 3-iodo-6-methoxy-4-phenoxy-2H-chromen-2-one (3af)

13C of NP-IM-1254

31.1.2017

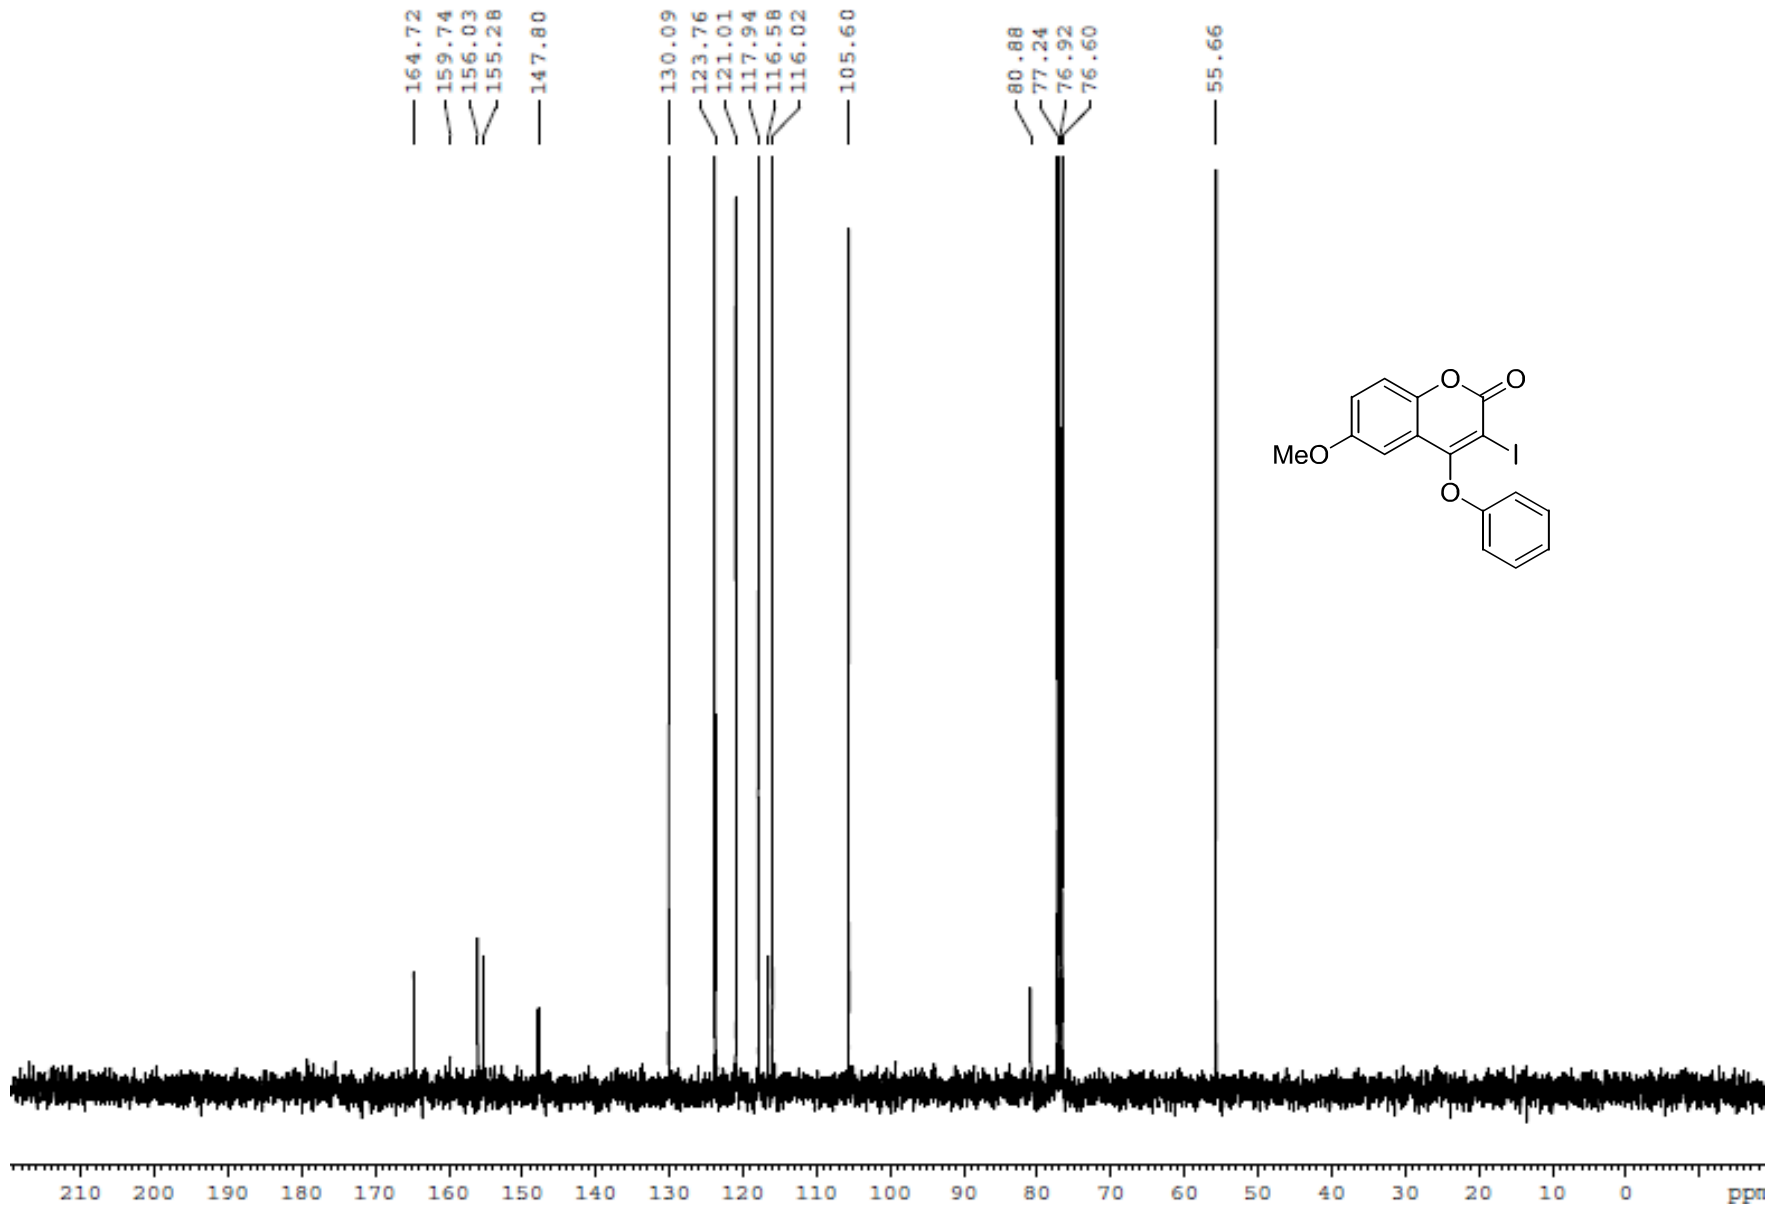

# <sup>1</sup>H of 7-(benzyloxy)-3-iodo-4-phenoxy-2H-chromen-2-one (3ag)

<sup>1</sup>H of NP-Im-1261 (A)

24.1.2017

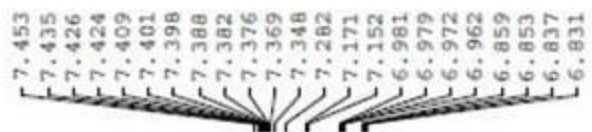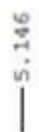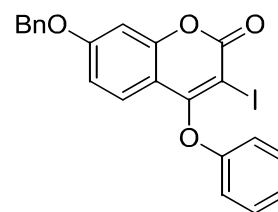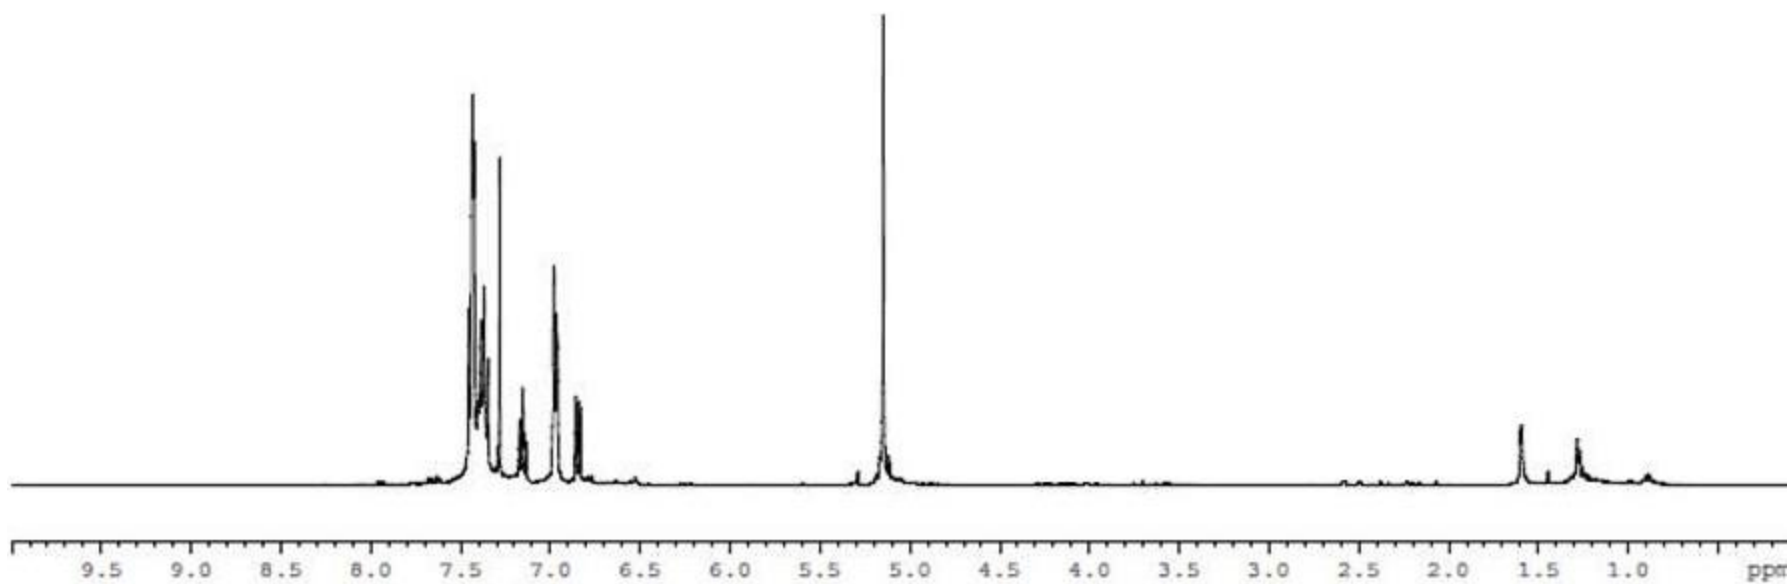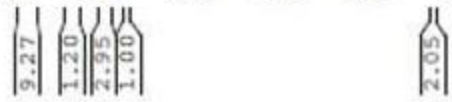

<sup>13</sup>C of 7-(benzyloxy)-3-iodo-4-phenoxy-2H-chromen-2-one (3ag)

<sup>13</sup>C of NP-IM-1261(A)

31.1.2017

165.08  
162.68  
159.99  
155.46  
155.15

135.32  
130.03  
128.70  
128.41  
127.42  
124.99  
123.58  
115.87  
113.52

101.58

77.22  
76.90  
76.59  
75.93  
70.58

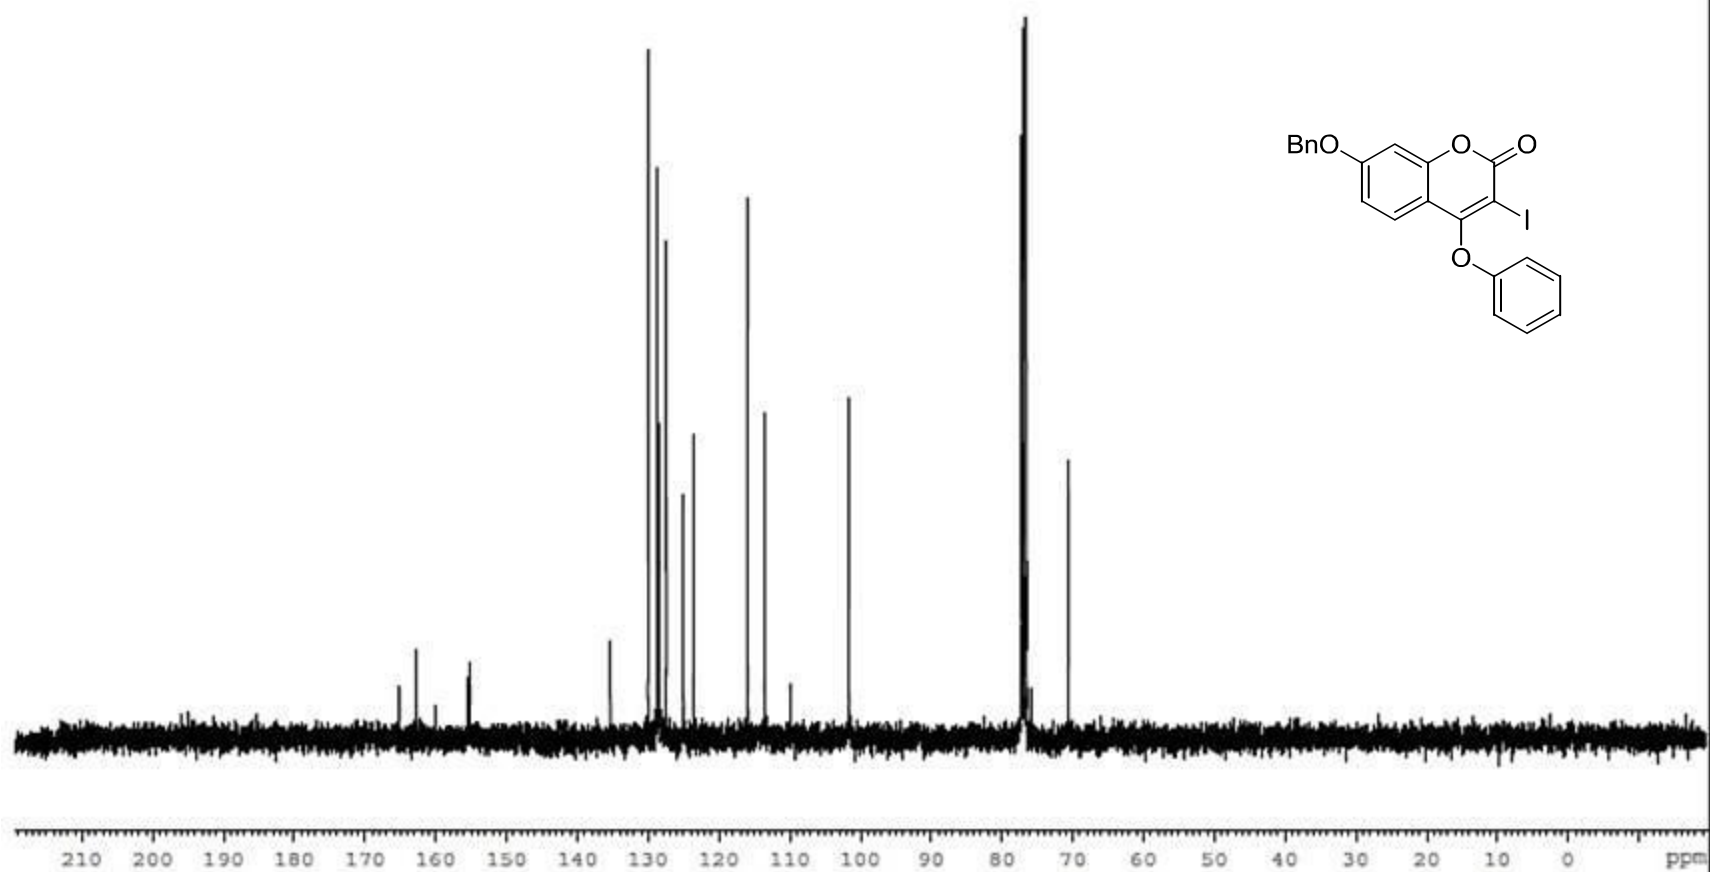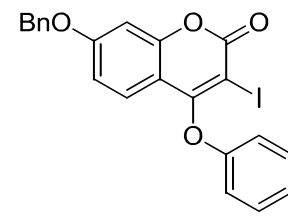

# <sup>1</sup>H of 6-(benzyloxy)-3-iodo-4-phenoxy-2H-chromen-2-one (3ah)

<sup>1</sup>H of NP-Im-1262

24.1.2017

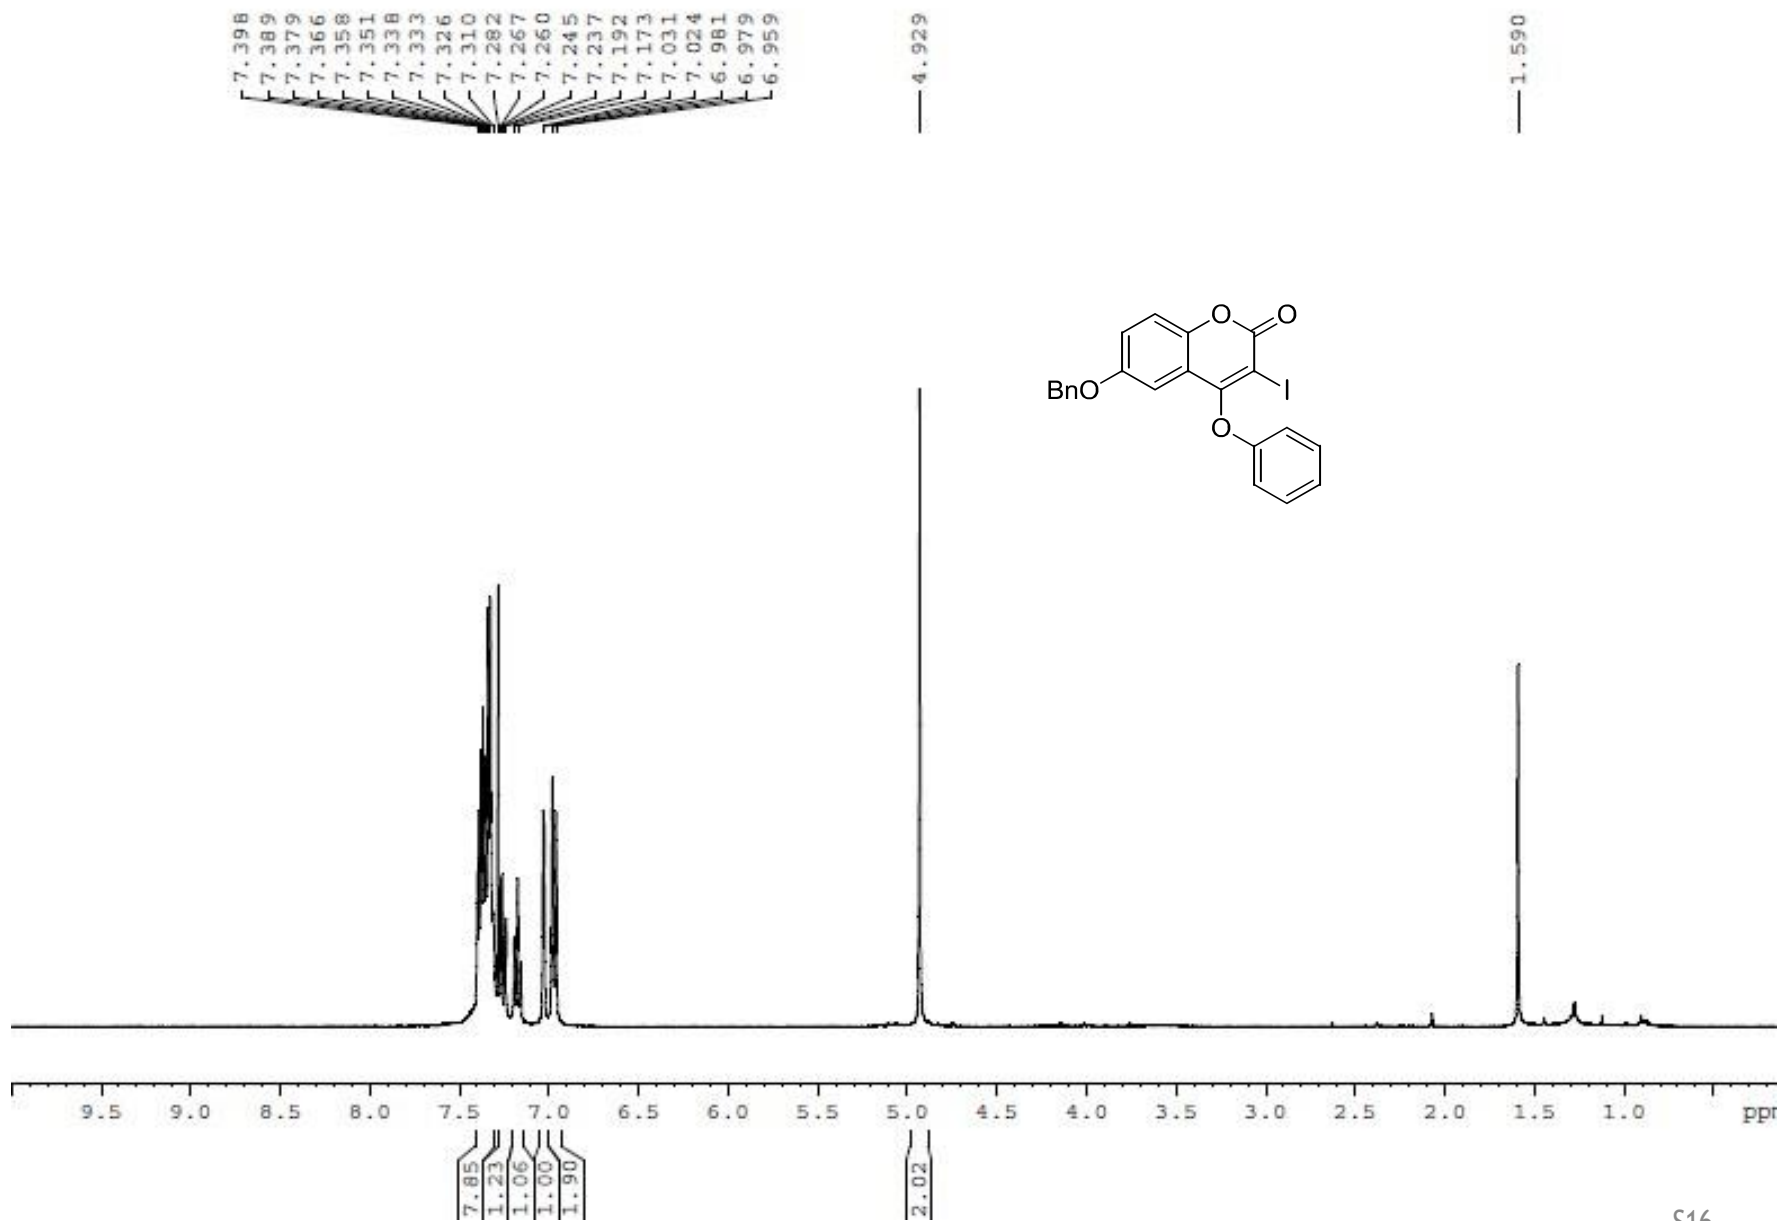



# <sup>13</sup>C of 6-(benzyloxy)-3-iodo-4-phenoxy-2H-chromen-2-one (3ah)

<sup>13</sup>C of NP-IM-1262

31.1.2017

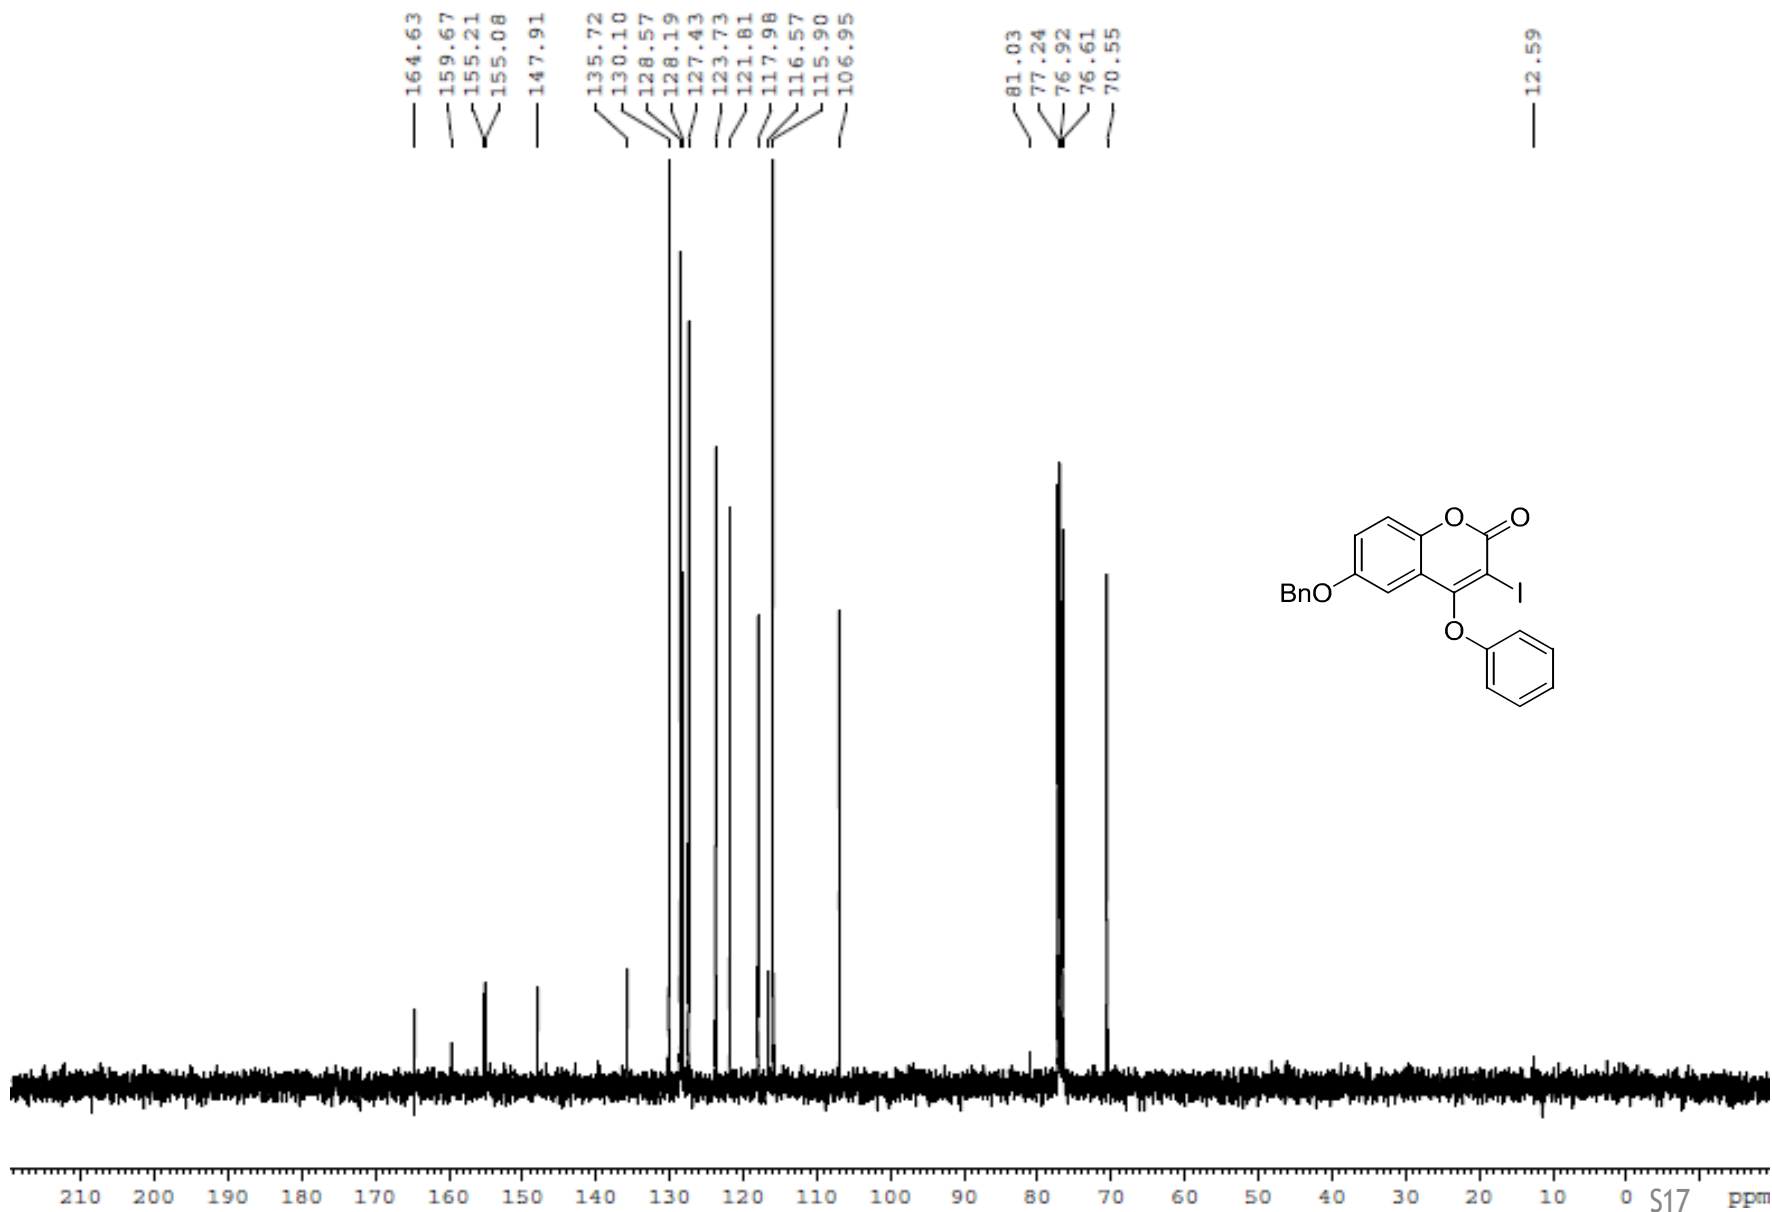

# <sup>1</sup>H of 3-iodo-4-phenoxy-2H-benzo[h]chromen-2-one (3ai)

<sup>1</sup>H of NP-IM-1156

02.12.2016

8.647  
8.633  
8.623  
7.880  
7.874  
7.871  
7.860  
7.857  
7.728  
7.716  
7.712  
7.703  
7.693  
7.689  
7.676  
7.608  
7.586  
7.510  
7.488  
7.399  
7.394  
7.380  
7.378  
7.363  
7.359  
7.353  
7.282  
7.186  
7.167  
7.149  
7.027  
7.025  
7.005  
6.997  
5.321

1.617

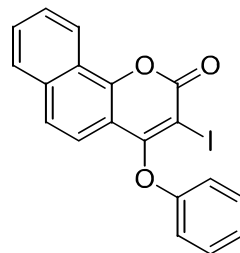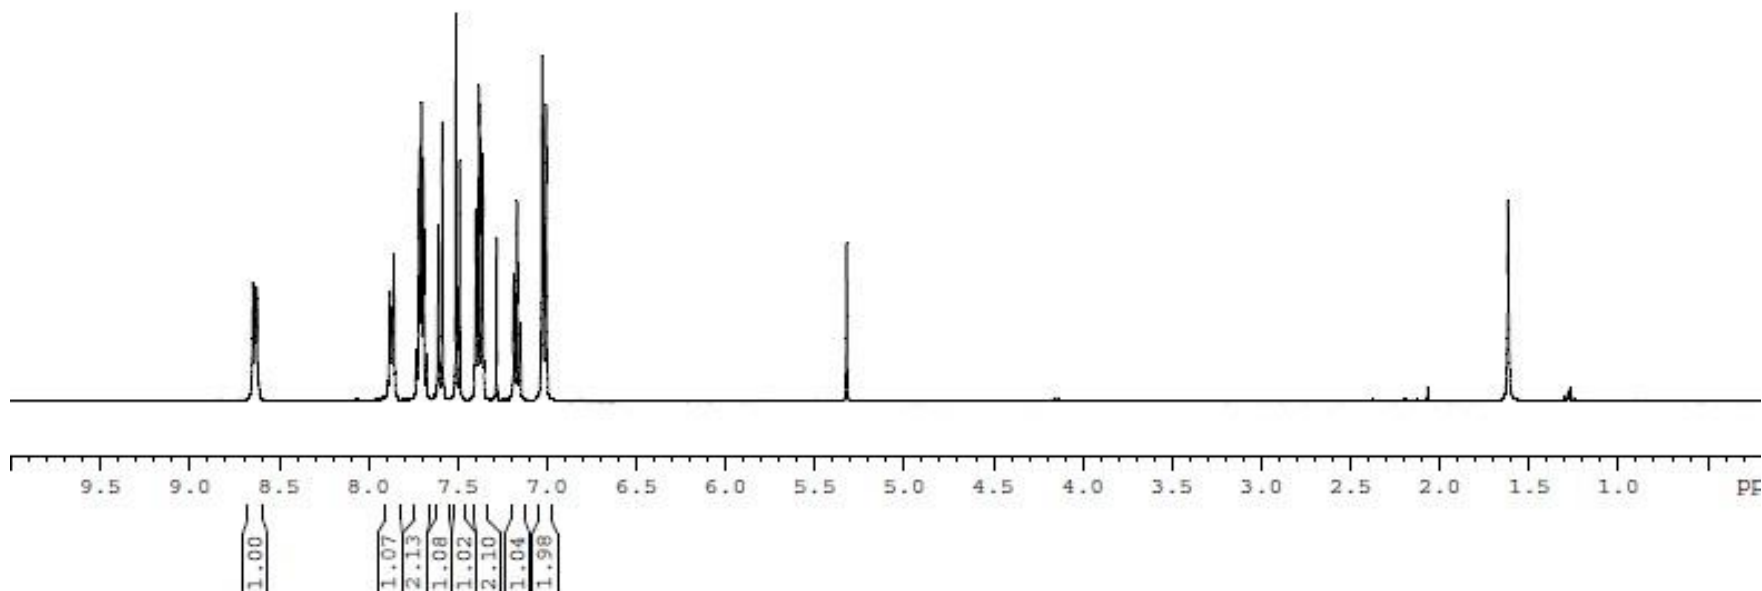

# <sup>13</sup>C of 3-iodo-4-phenoxy-2H-benzo[h]chromen-2-one (3ai)

<sup>13</sup>C of NP-IM-1156

05.12.2016

165.79  
159.84  
155.60  
151.36  
135.28  
130.23  
129.53  
127.95  
127.65  
124.75  
123.78  
122.70  
122.60  
119.08  
115.98  
112.01  
79.42  
77.37  
77.05  
76.73

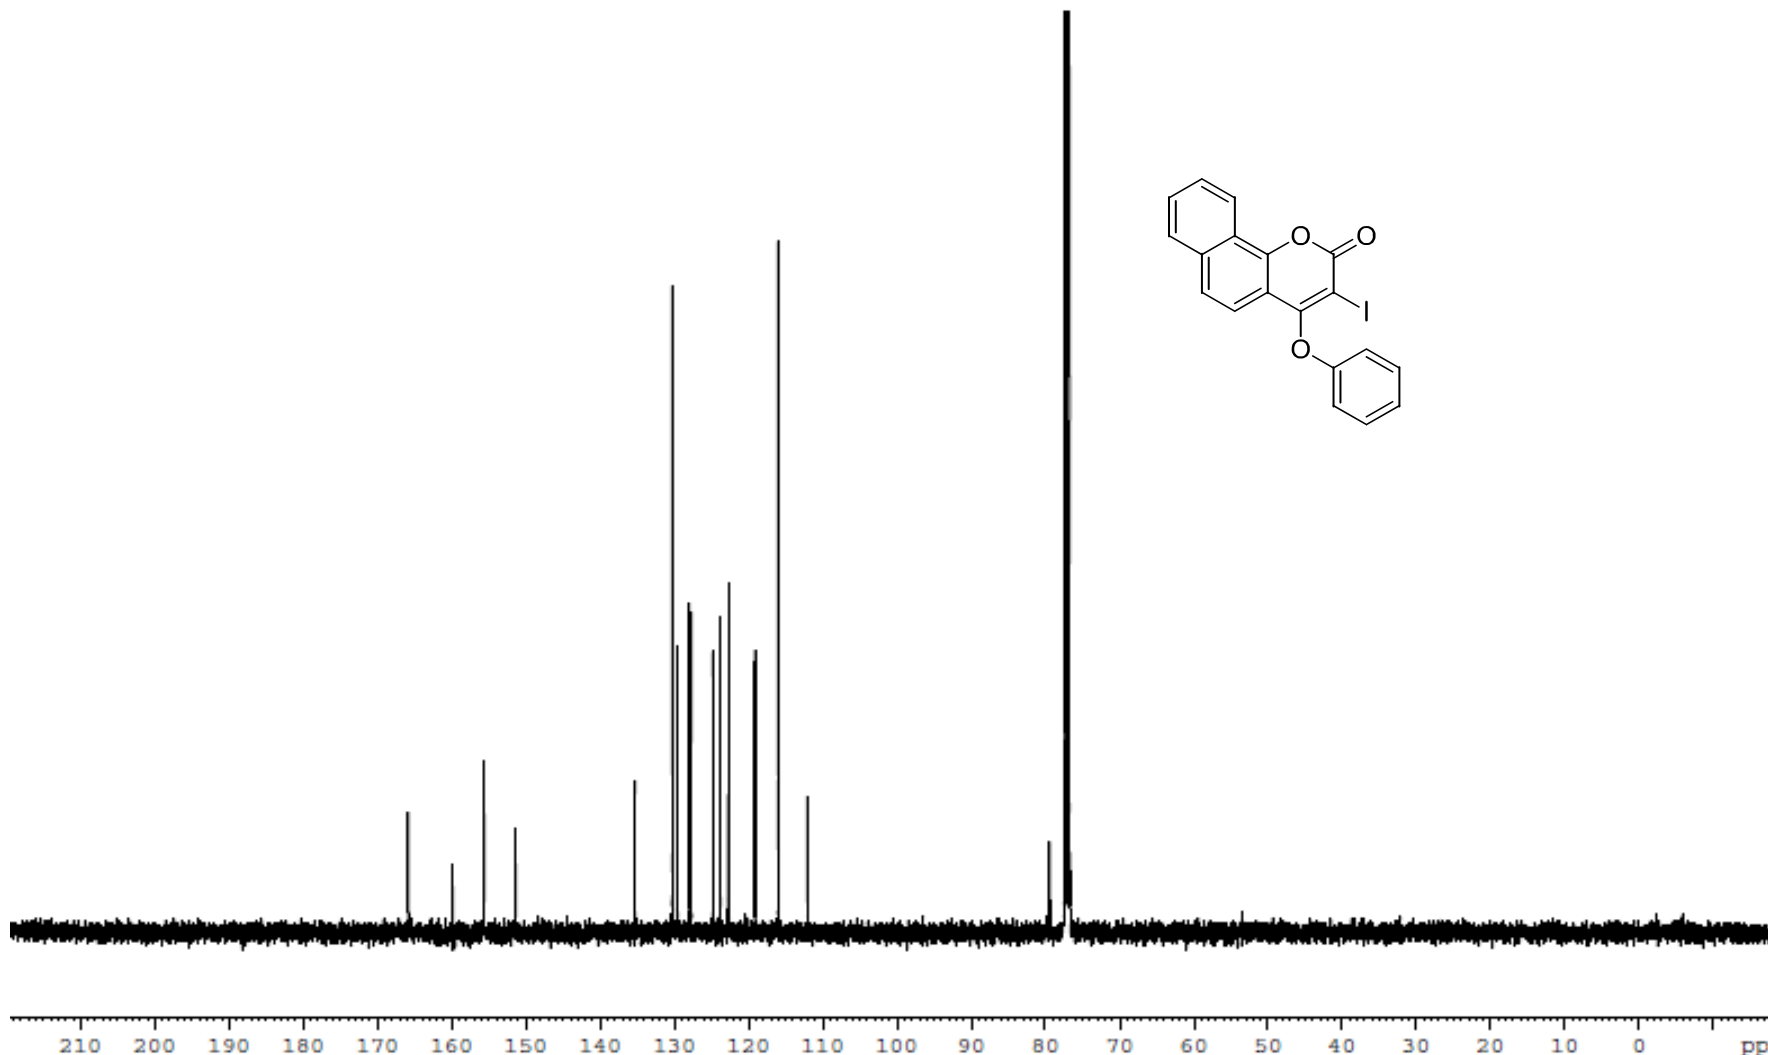

# <sup>1</sup>H of 2-iodo-1-phenoxy-3H-benzo[*f*]chromen-3-one (3aj)

<sup>1</sup>H of NP-IM-1013

15.6.2016

8.852  
8.831  
8.126  
8.104  
7.911  
7.892  
7.887  
7.594  
7.585  
7.580  
7.571  
7.567  
7.563  
7.548  
7.543  
7.528  
7.525  
7.511  
7.508  
7.367  
7.363  
7.349  
7.347  
7.327  
7.321  
7.282  
7.143  
7.124  
7.106  
7.003  
6.984

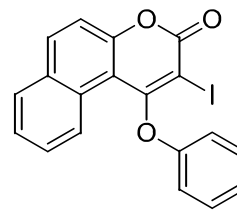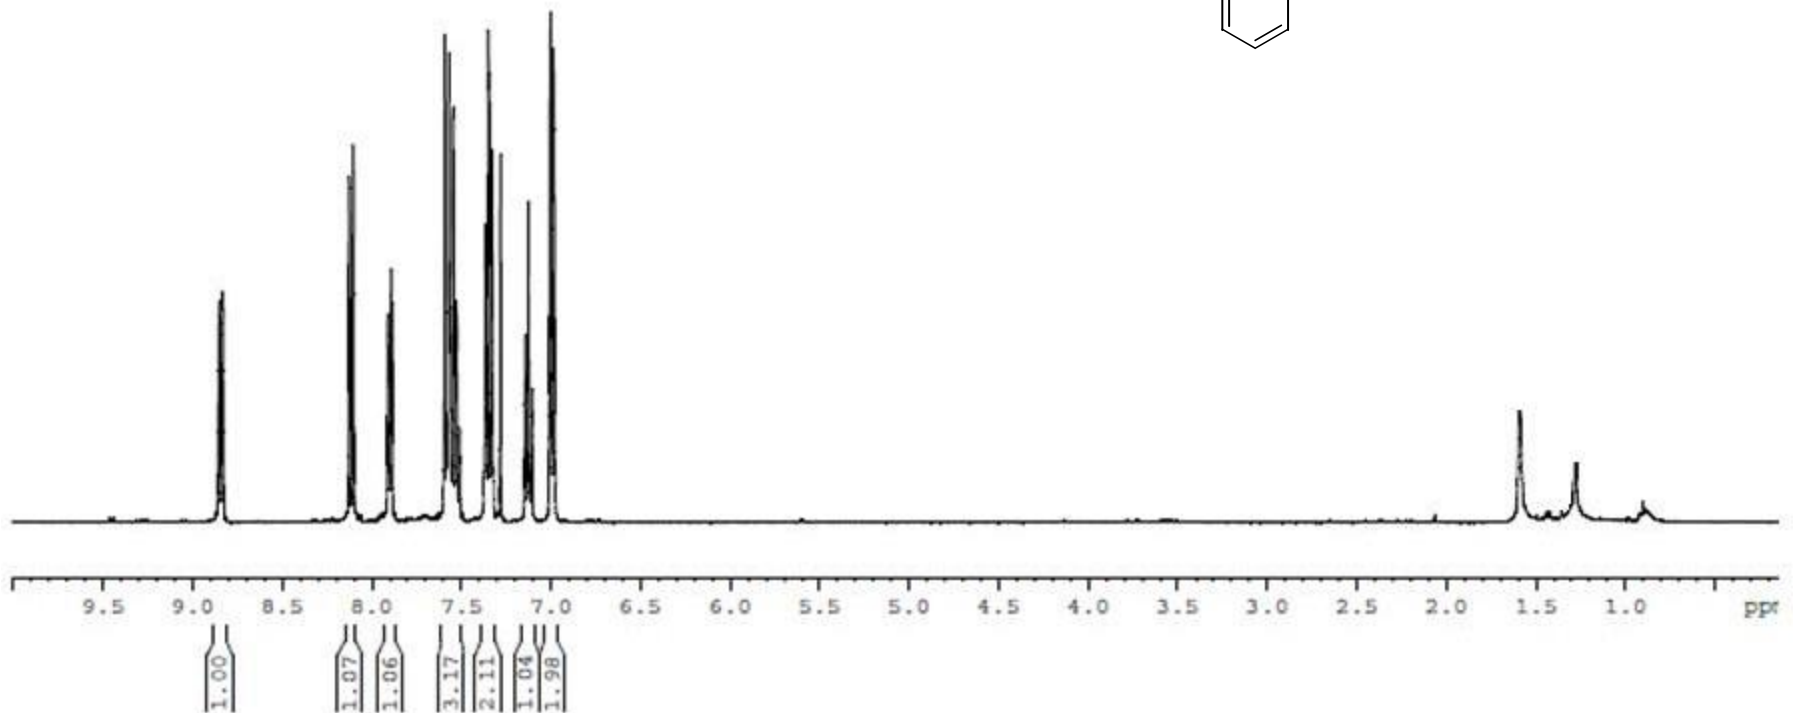

# <sup>13</sup>C of 2-iodo-1-phenoxy-3H-benzo[*f*]chromen-3-one (3aj)

<sup>13</sup>C of NP-IM-1013

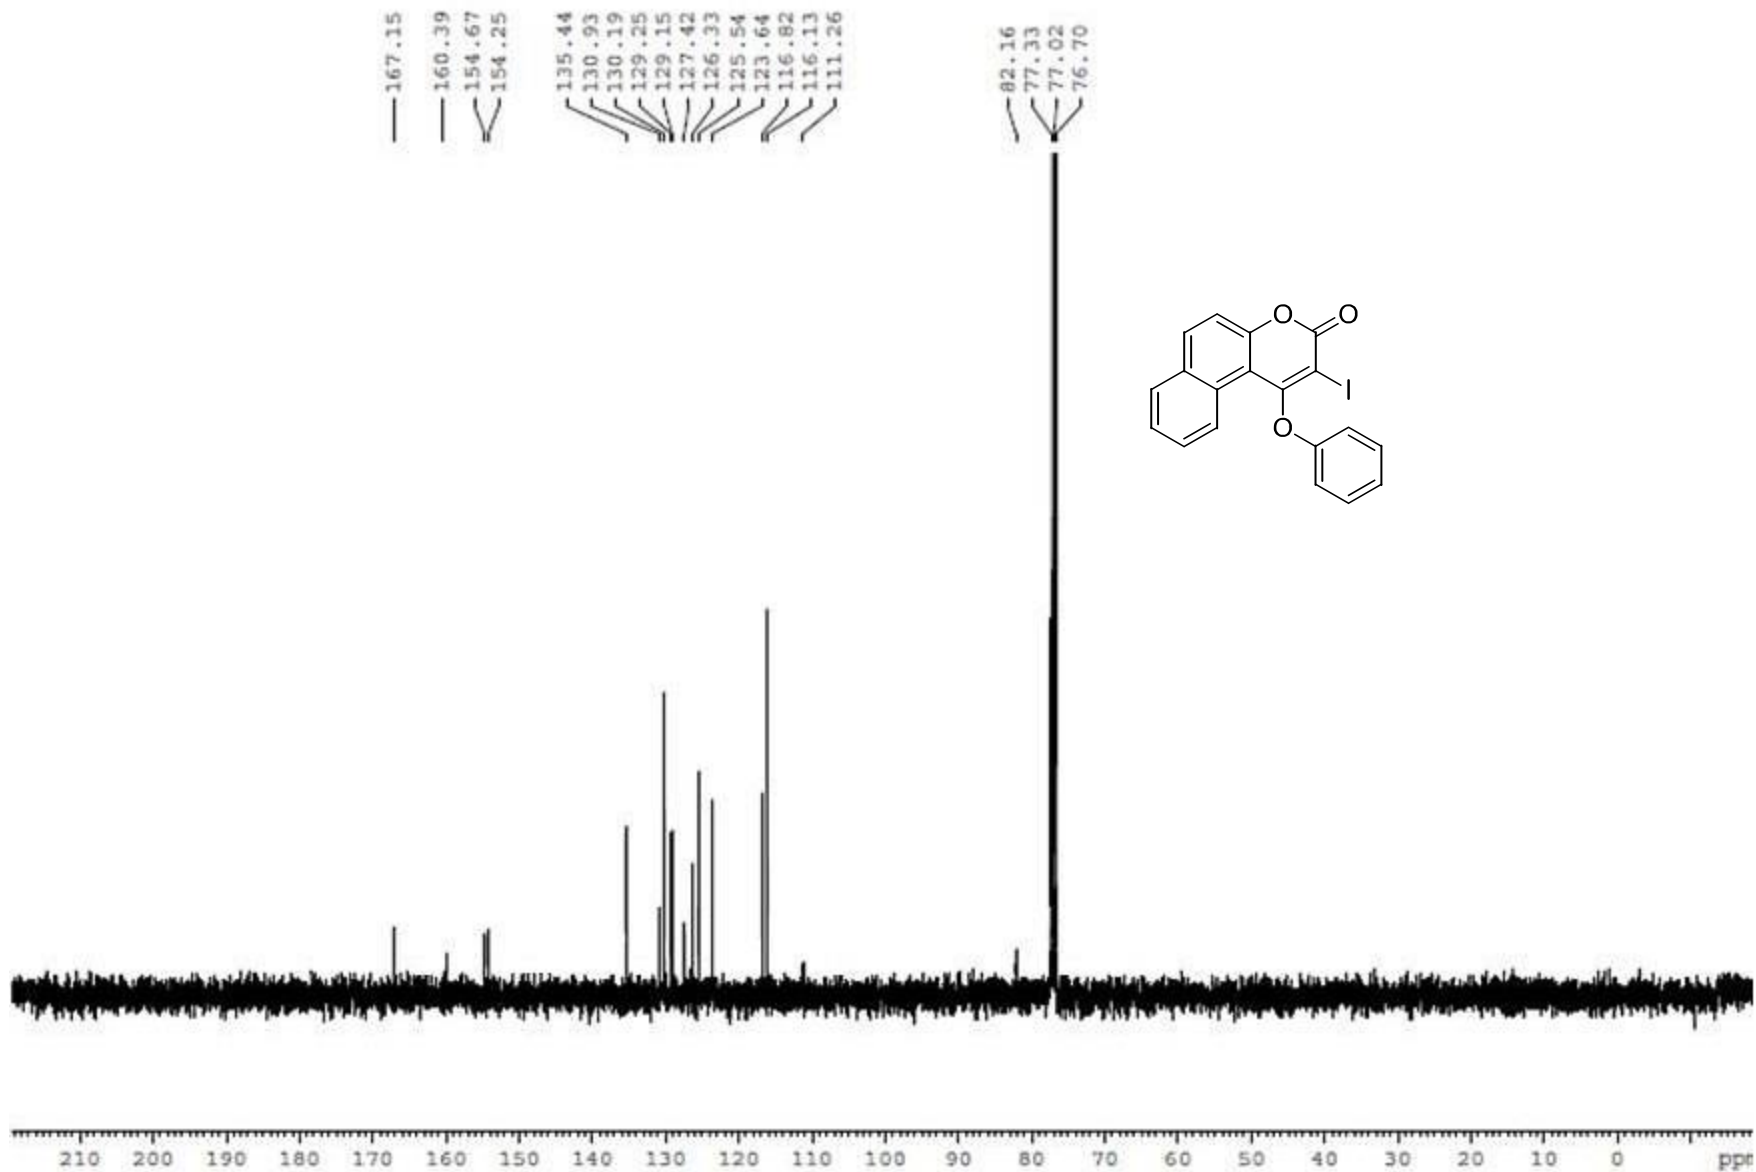

# <sup>1</sup>H of 3-iodo-6-nitro-4-phenoxy-2H-chromen-2-one (3ak)

<sup>1</sup>H of NP-IM-3AL 25.8.2017

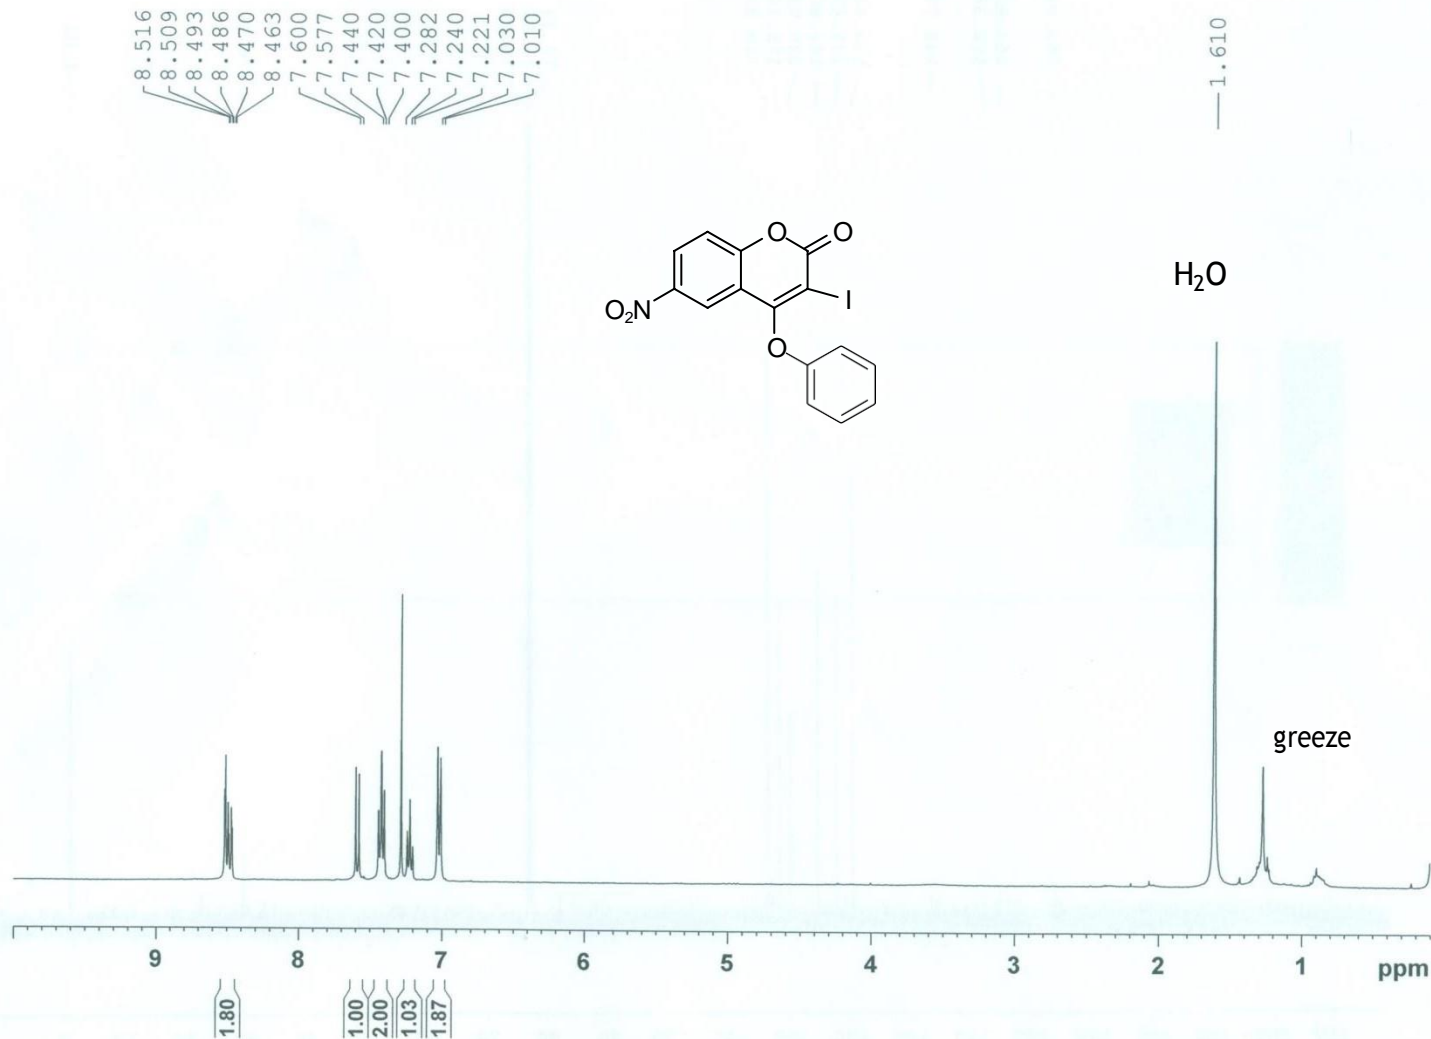

# <sup>1</sup>H of 3-iodo-6-nitro-4-phenoxy-2H-chromen-2-one (3ak)

13C of NP-IM-3AL 25.8.2017

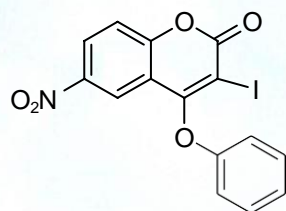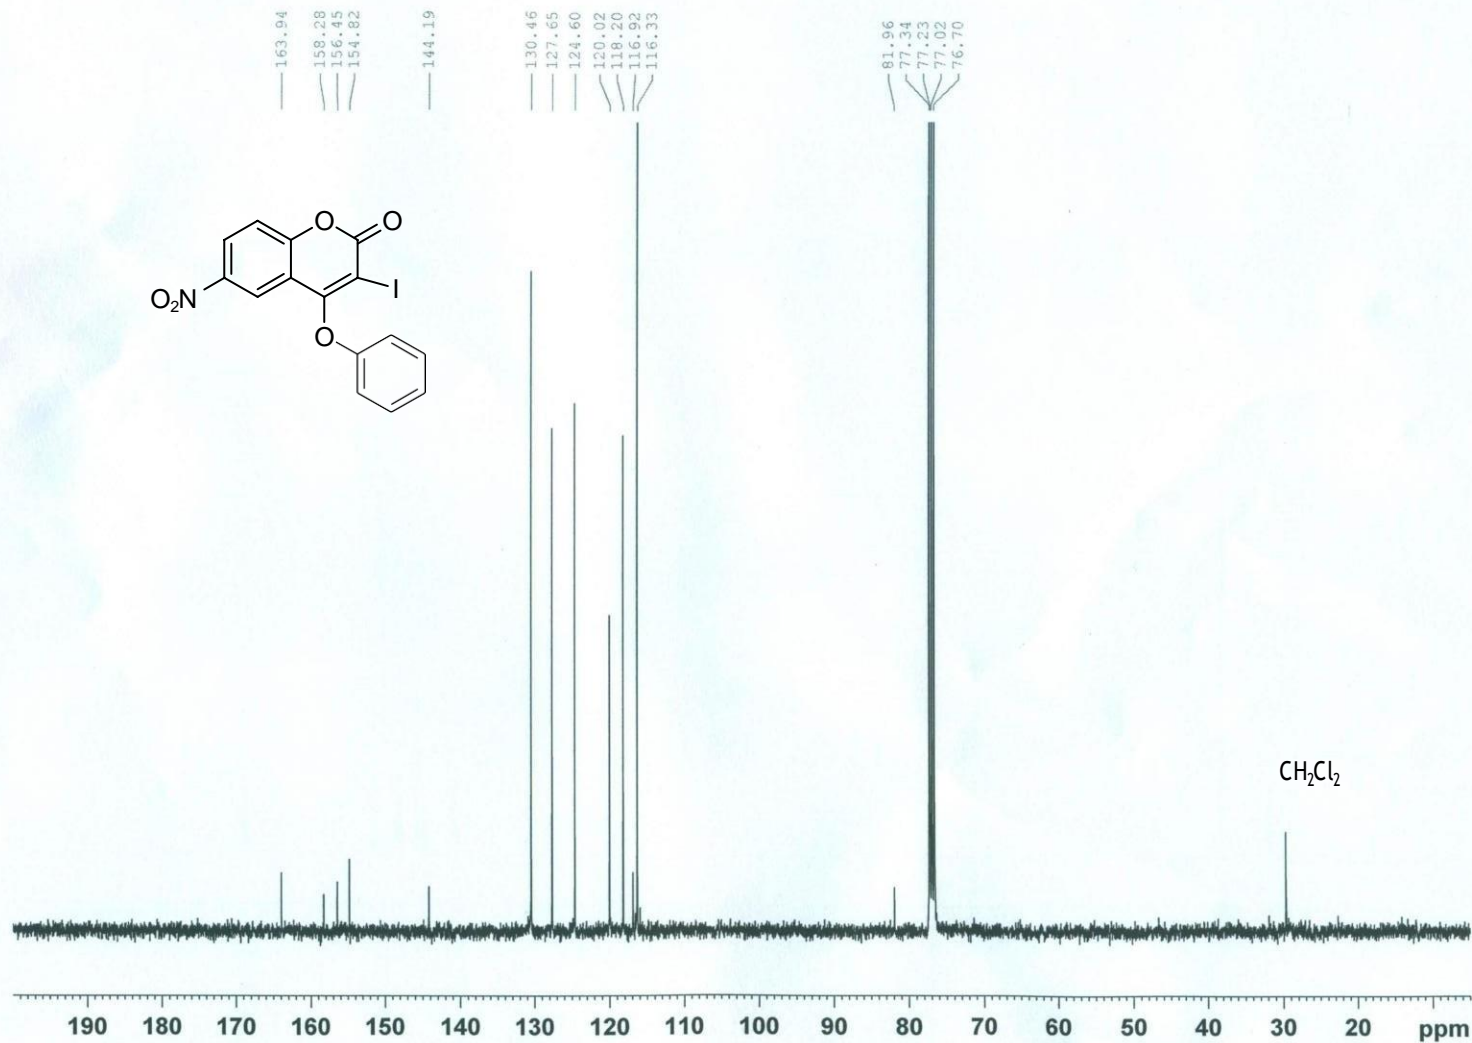

# <sup>1</sup>H of 3-iodo-8-methyl-6-nitro-4-phenoxy-2H-chromen-2-one (3al)

<sup>1</sup>H of NP-IM-3AM

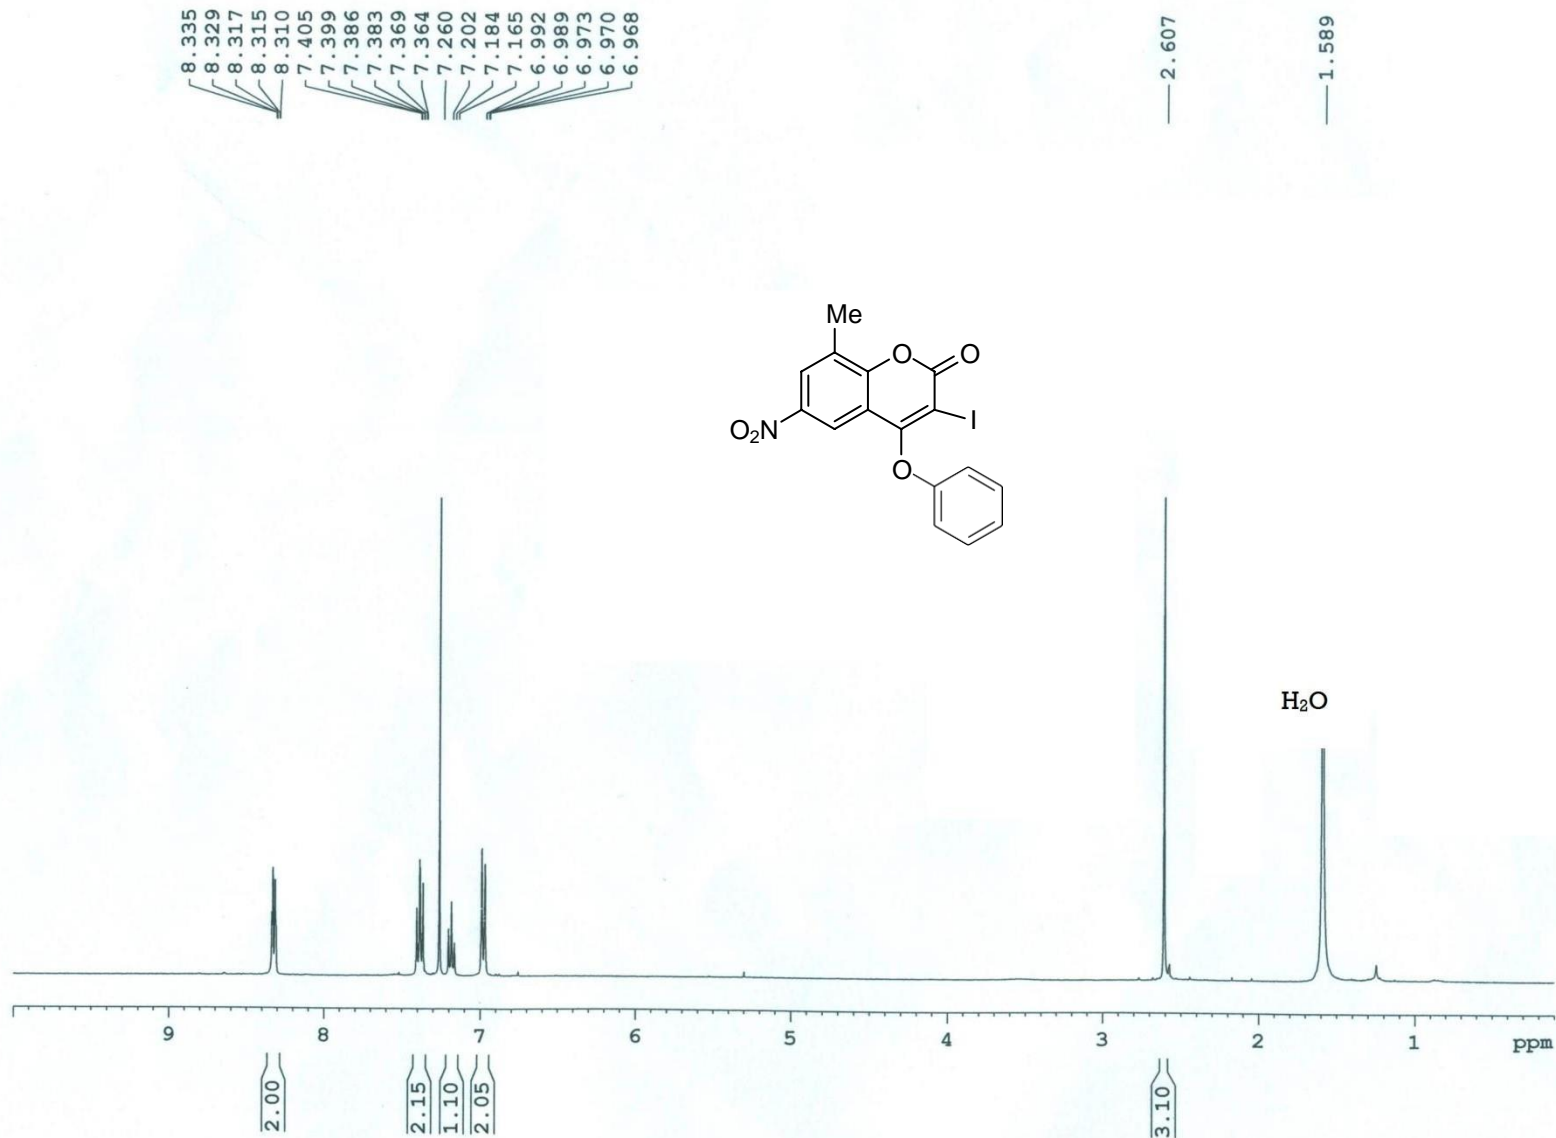



# <sup>13</sup>C of 3-iodo-8-methyl-6-nitro-4-phenoxy-2H-chromen-2-one (3al)

<sup>13</sup>C of NP-IM-O-C-N 04.01.2017

— 164.36  
— 158.38  
— 154.96  
  
— 143.59  
  
130.42  
128.81  
128.35  
124.44  
117.58  
116.61  
116.25  
  
81.79  
77.40  
77.08  
76.76  
  
— 29.72  
  
— 16.08

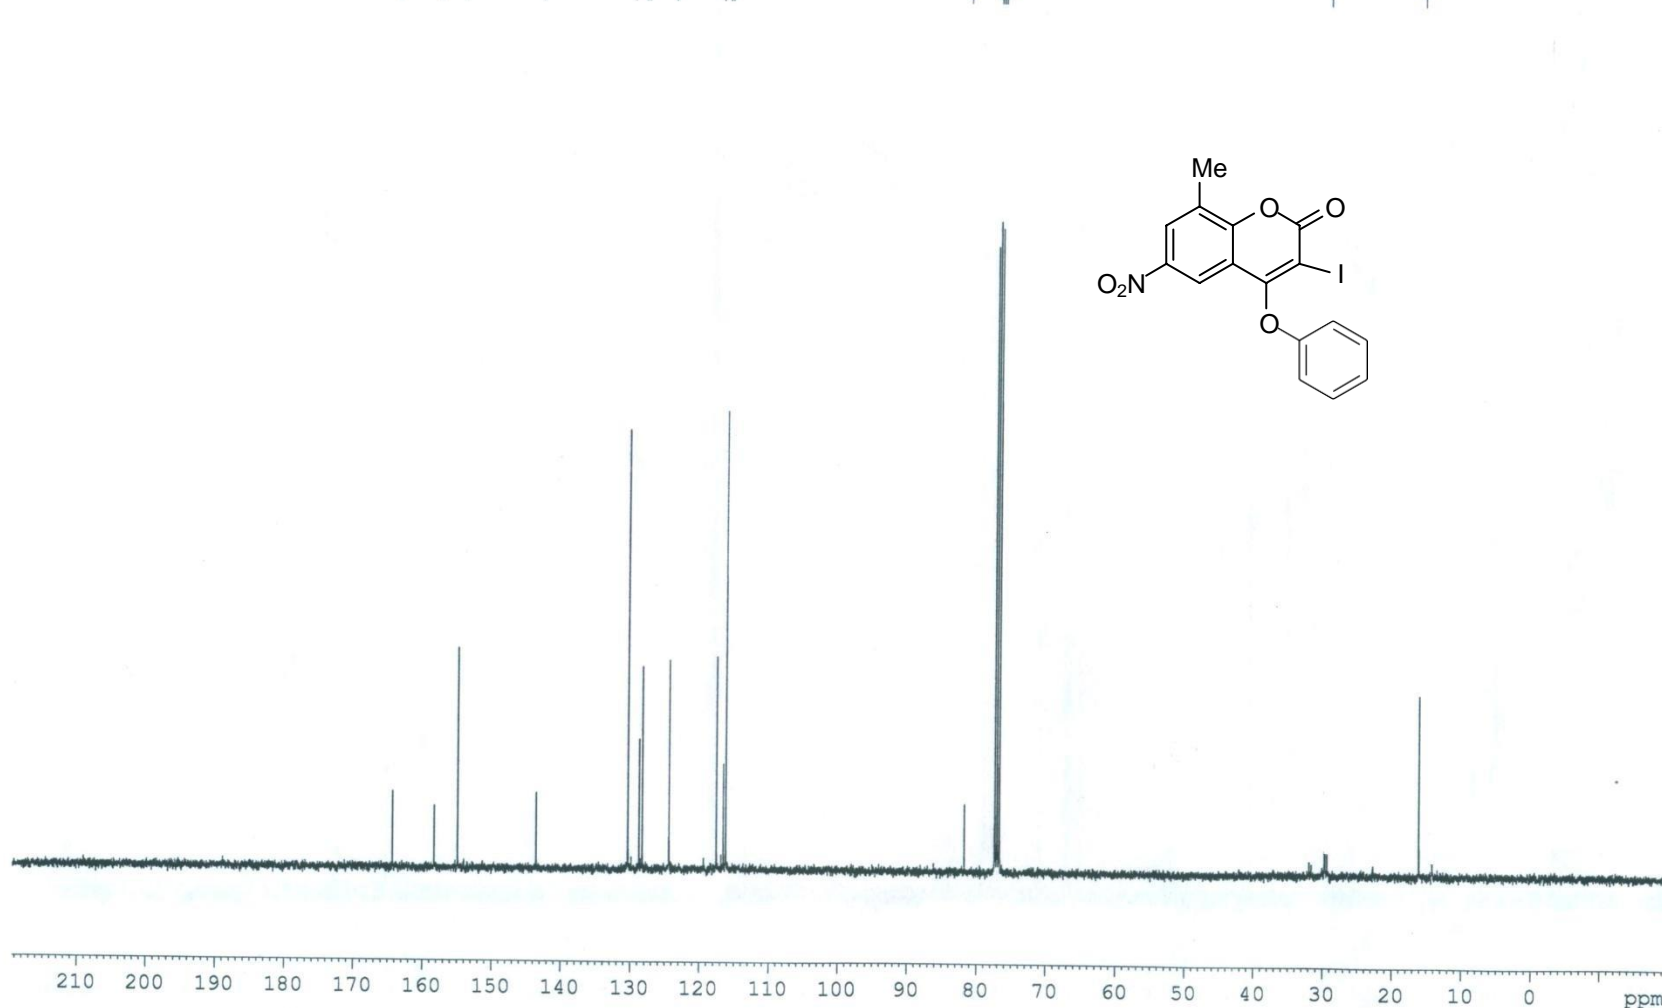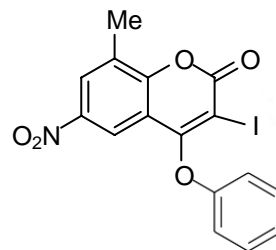

# <sup>1</sup>H NMR 6,8-dichloro-3-iodo-4-phenoxy-2H-chromen-2-one (3am)

<sup>1</sup>H of NP-IM-dichloro-O-Ar

3.2.2017

7.668  
7.662  
7.490  
7.484  
7.421  
7.416  
7.402  
7.381  
7.282  
7.216  
7.198  
7.179  
6.981  
6.979  
6.959

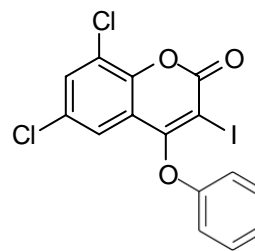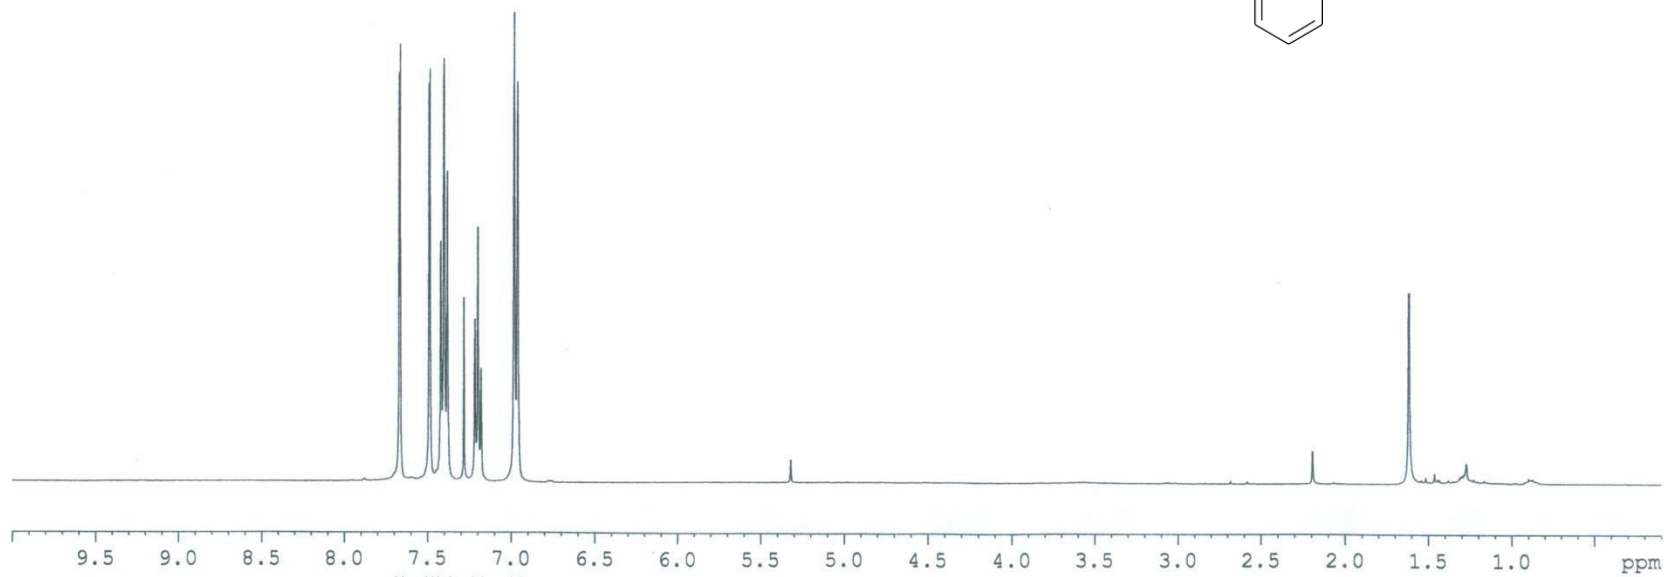

1.00  
1.01  
2.30  
1.12  
2.16

# <sup>13</sup>C NMR of 6,8-dichloro-3-iodo-4-phenoxy-2H-chromen-2-one (3am)

NP-IM-dicholoro -o-Ar13c

3.2.2017

163.60  
157.92  
154.92  
147.84  
133.09  
130.36  
130.14  
124.27  
123.03  
121.70  
118.54  
116.03  
82.41  
77.36  
77.04  
76.72

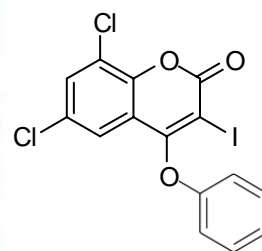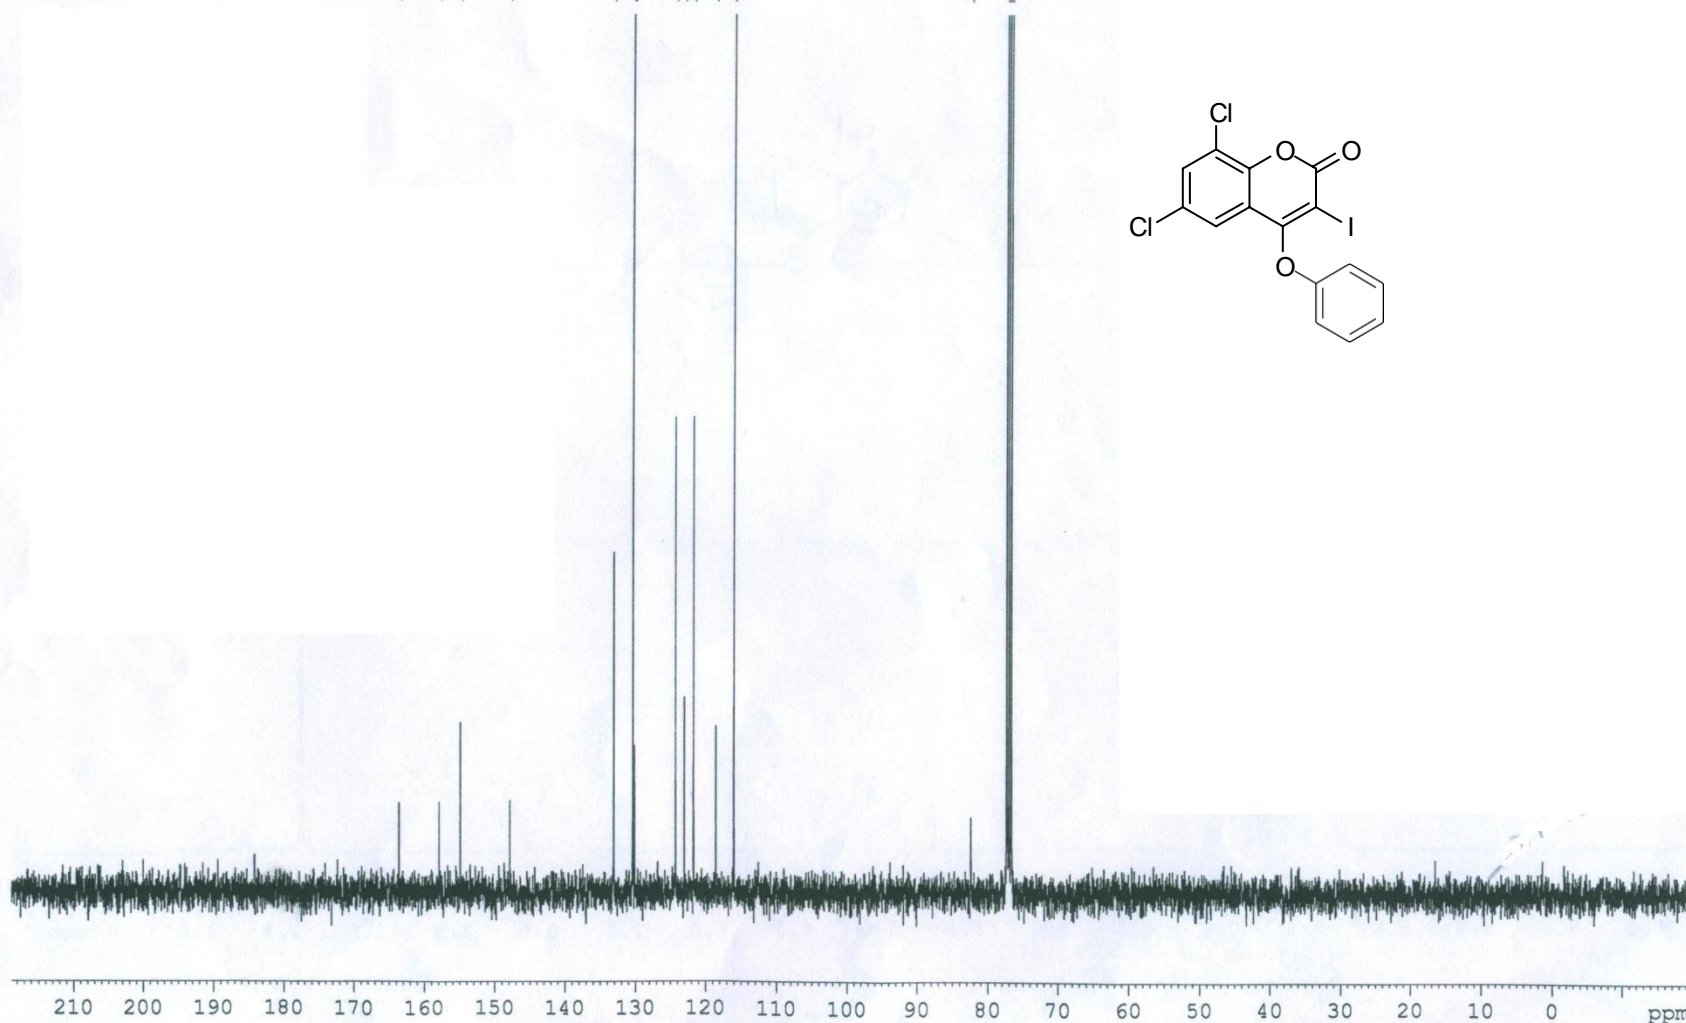

# <sup>1</sup>H of 4-(p-toloxoy)-3-iodo-2H-chromen-2-one (3ba)

<sup>1</sup>H of NP-IM-1296

27.2.2017

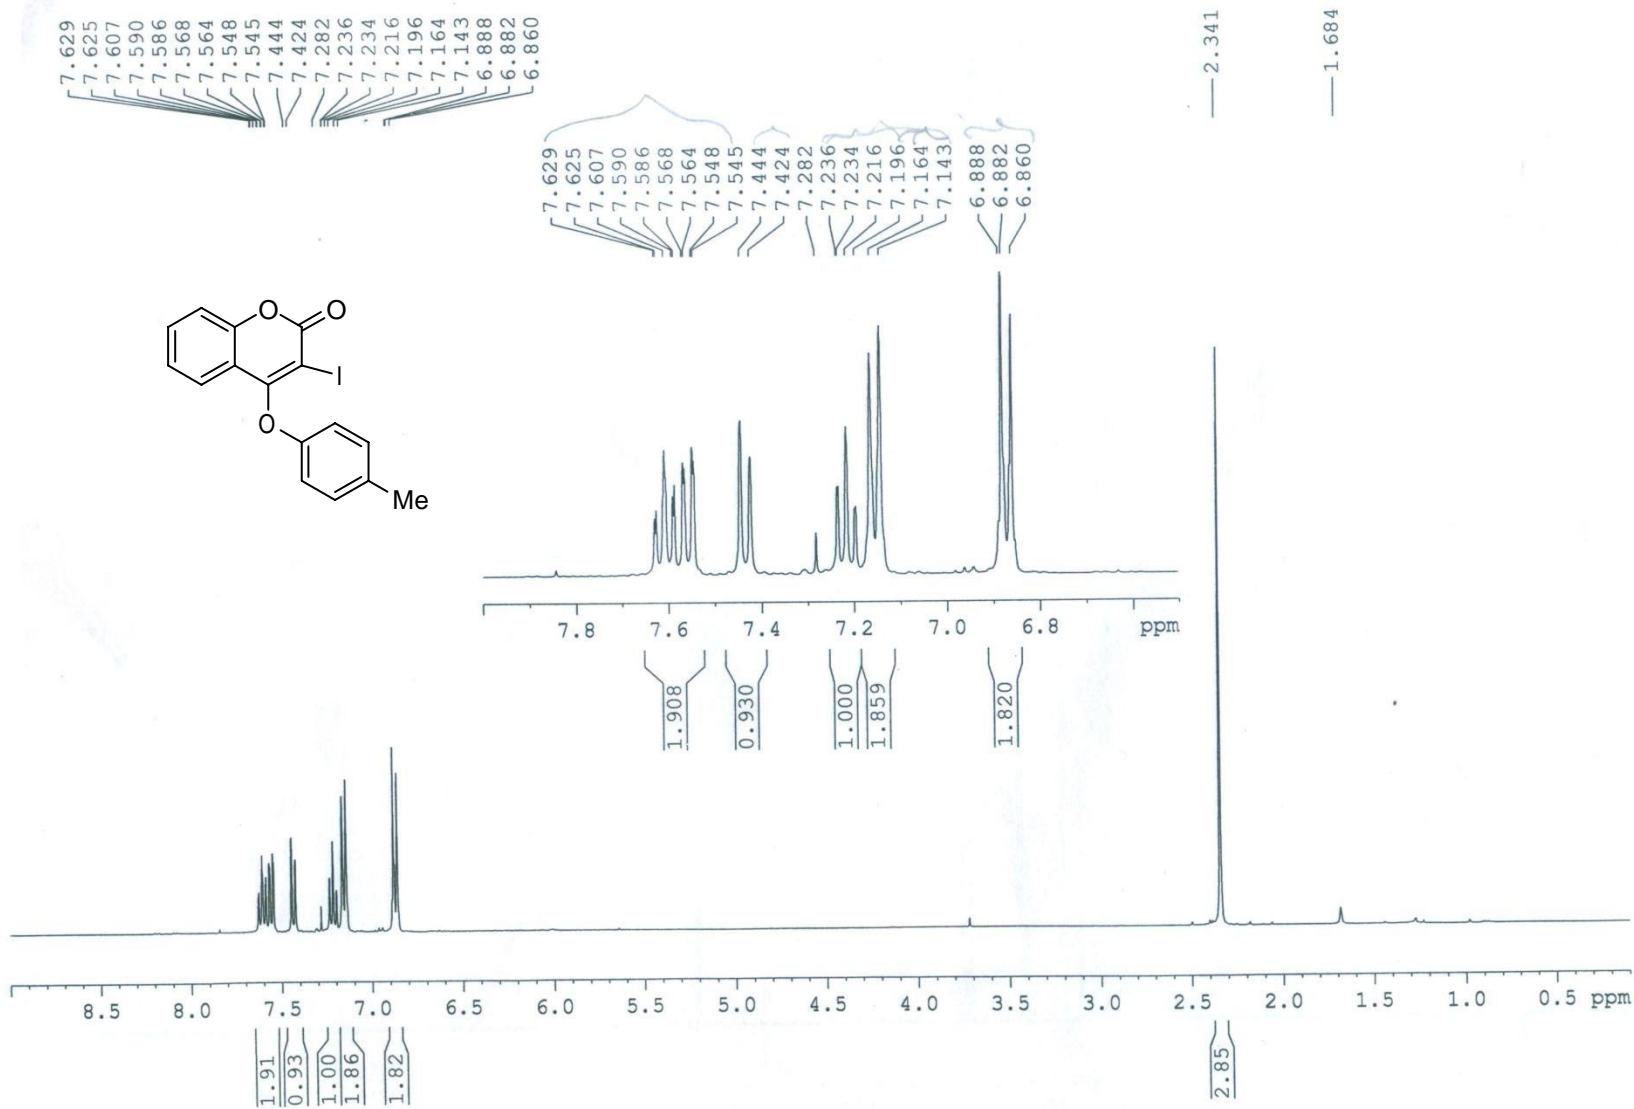

# <sup>13</sup>C of 4-(p-tolyloxy)-3-iodo-2H-chromen-2-one (3ba)

<sup>13</sup>C of NP-IM-1296

27.2.2017

— 165.11  
— 159.54  
— 153.37  
— 153.30

— 133.26  
— 132.90  
— 130.48  
— 124.50  
— 123.86  
— 116.77  
— 116.25  
— 115.66

— 80.19  
— 77.27  
— 76.95  
— 76.63

— 20.54

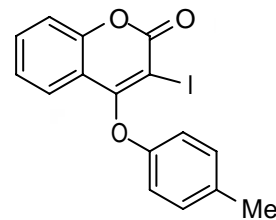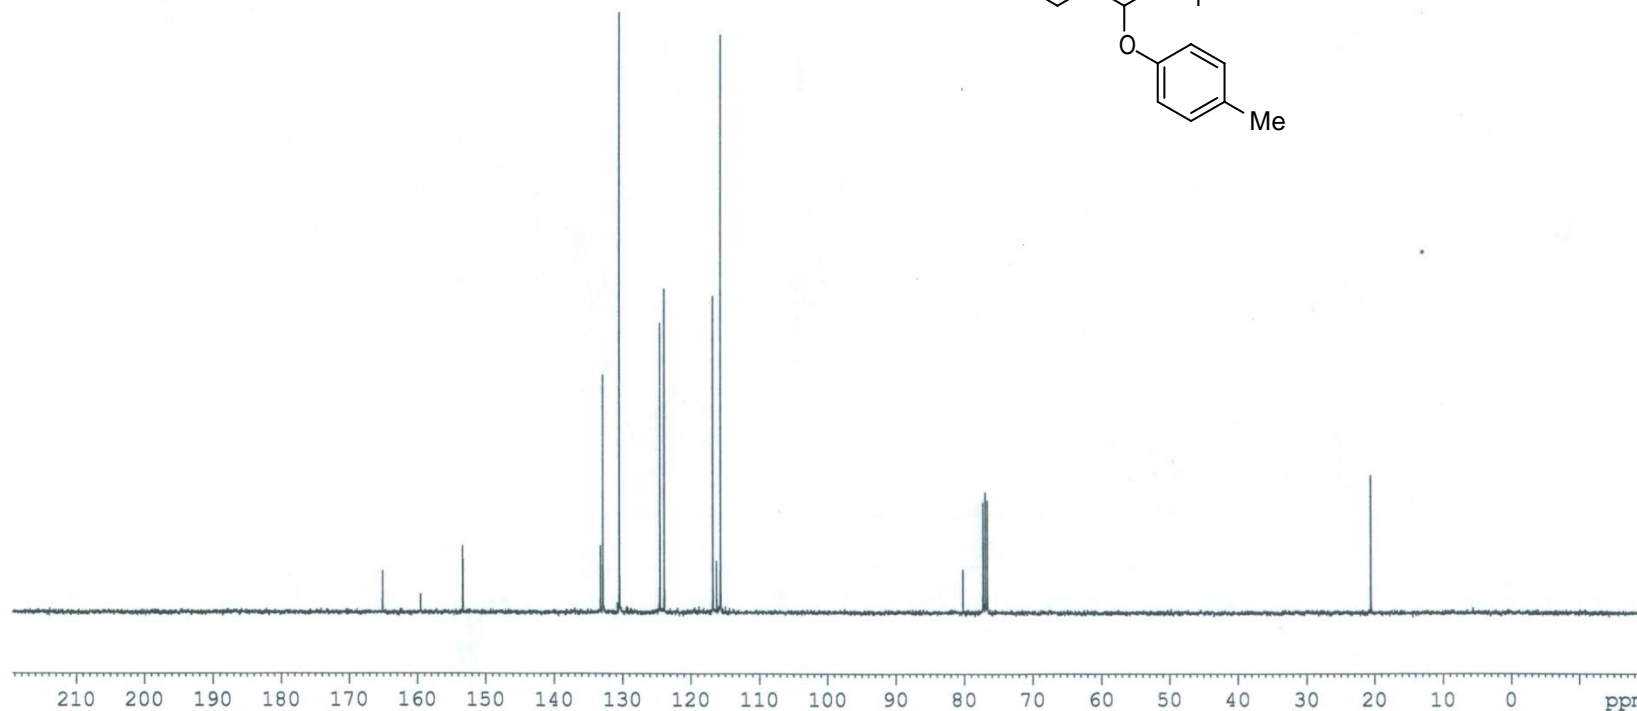

# <sup>1</sup>H of 4-(4-chlorophenoxy)-3-iodo-2H-chromen-2-one (3ca)

<sup>1</sup>H of NP-IM-3CA

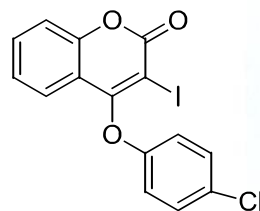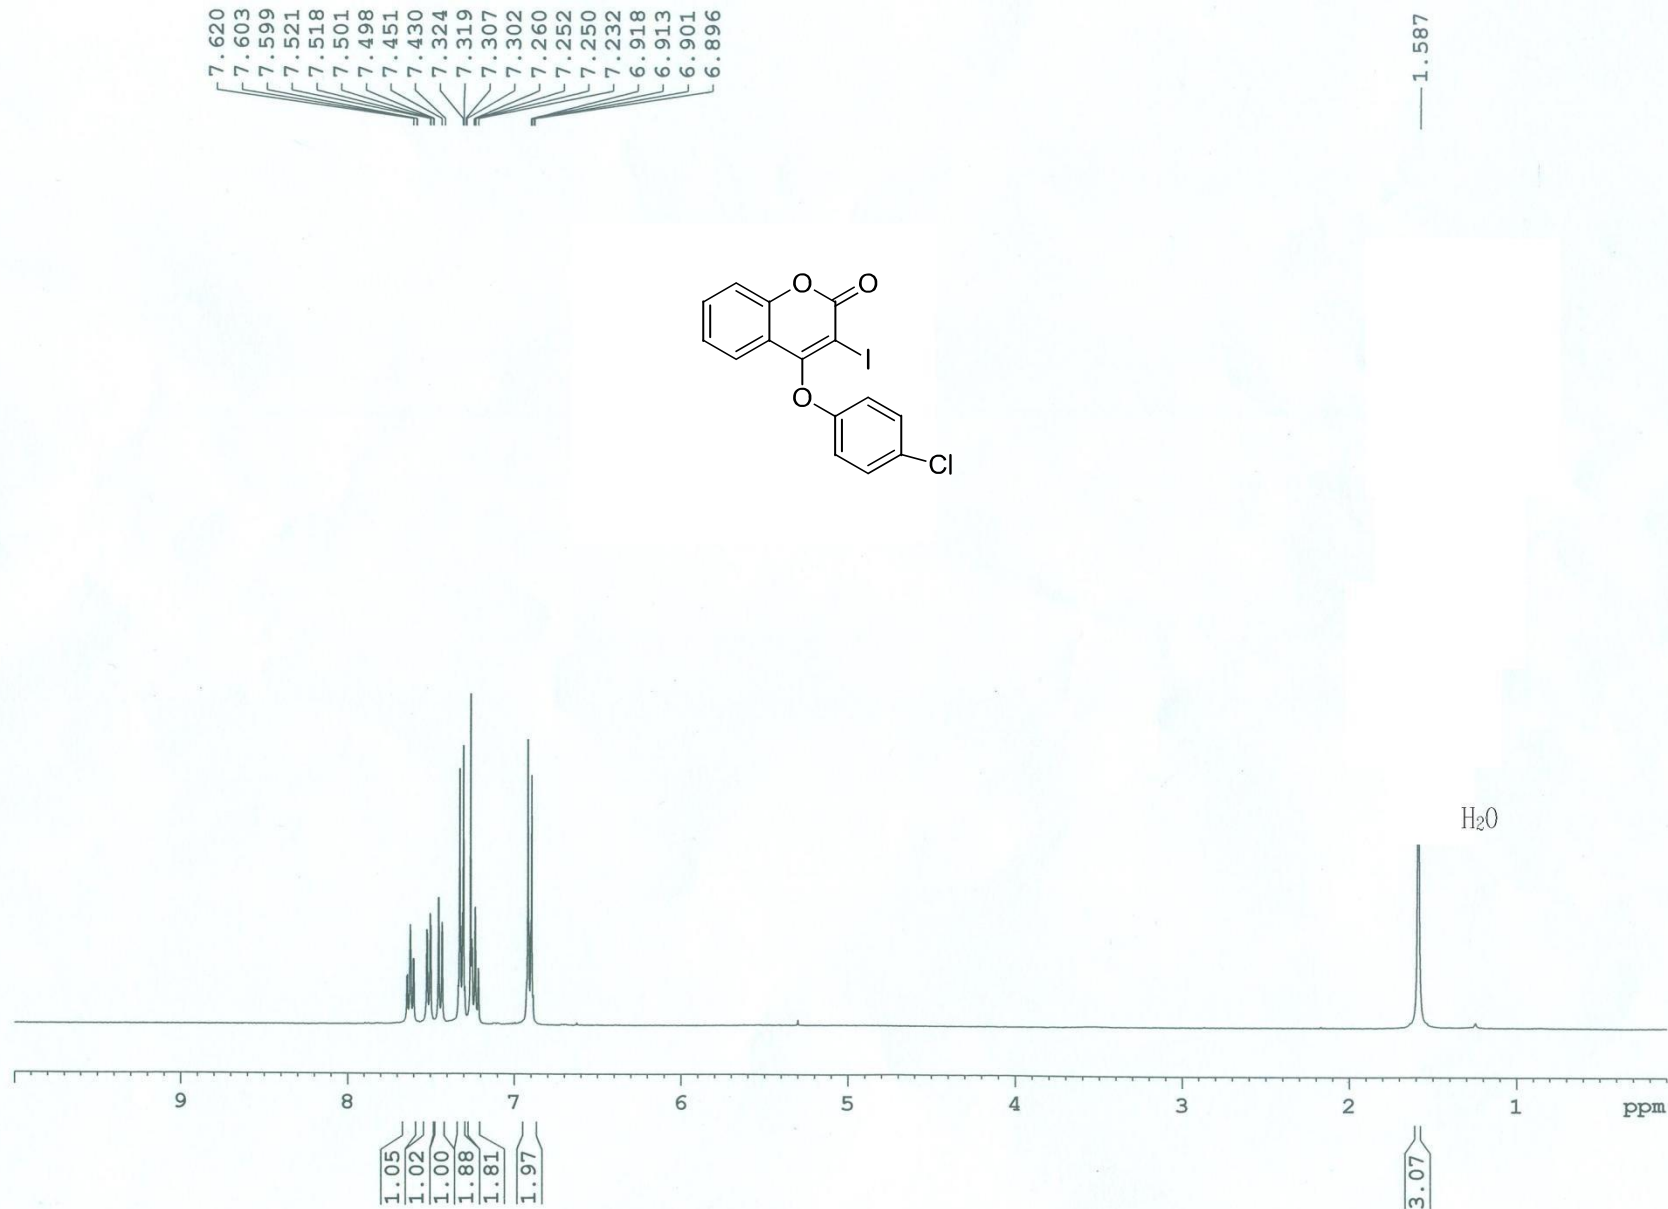

# <sup>13</sup>C of 4-(4-chlorophenoxy)-3-iodo-2H-chromen-2-one (3ca)

<sup>13</sup>C of NP-IM-1316

22.3.2017

164.57  
159.27  
153.80  
153.24  
133.25  
130.07  
128.85  
124.73  
123.56  
117.21  
116.89  
115.89  
115.32

80.65  
77.38  
77.06  
76.75

29.59

0.95

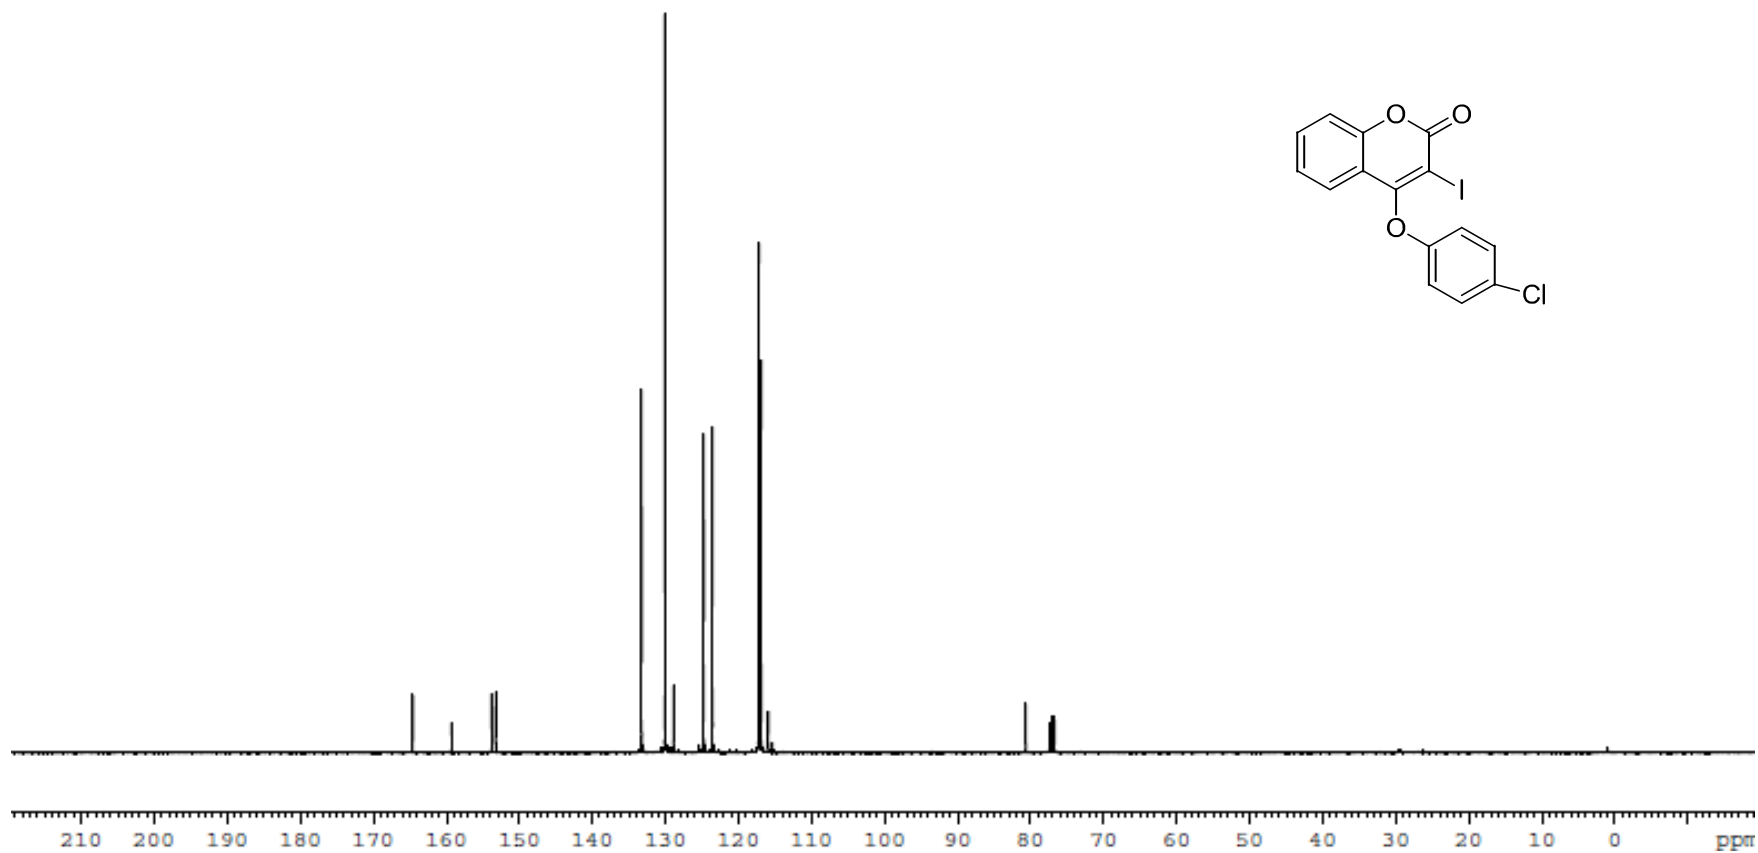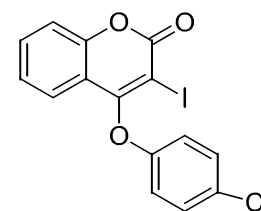

# <sup>1</sup>H of 3-iodo-4-(3-methoxyphenoxy)-2H-chromen-2-one (3da)

<sup>1</sup>H of NP-IM-3EA

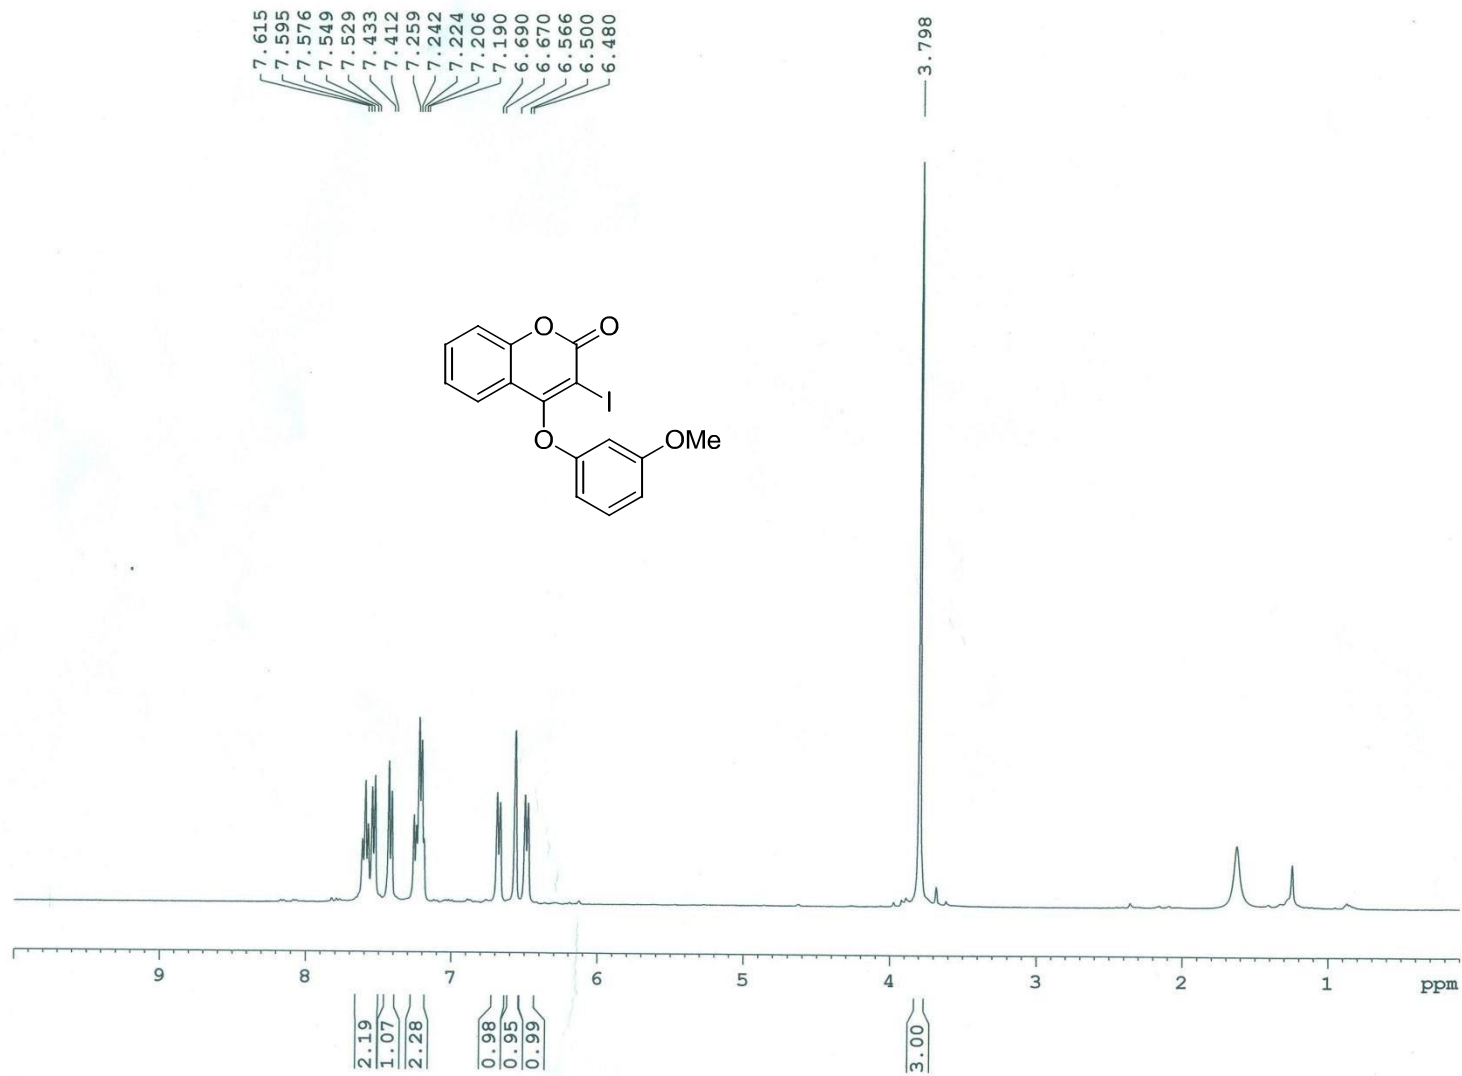



# <sup>13</sup>C of 3-iodo-4-(3-methoxyphenoxy)-2H-chromen-2-one (3da)

<sup>13</sup>C of NP-IM-1299 27.2.2017

164.82  
161.14  
159.44  
156.32  
153.26

132.99  
130.48  
124.58  
123.77  
116.77  
116.12  
109.07  
107.87  
102.61

80.52  
77.31  
76.99  
76.67

55.43

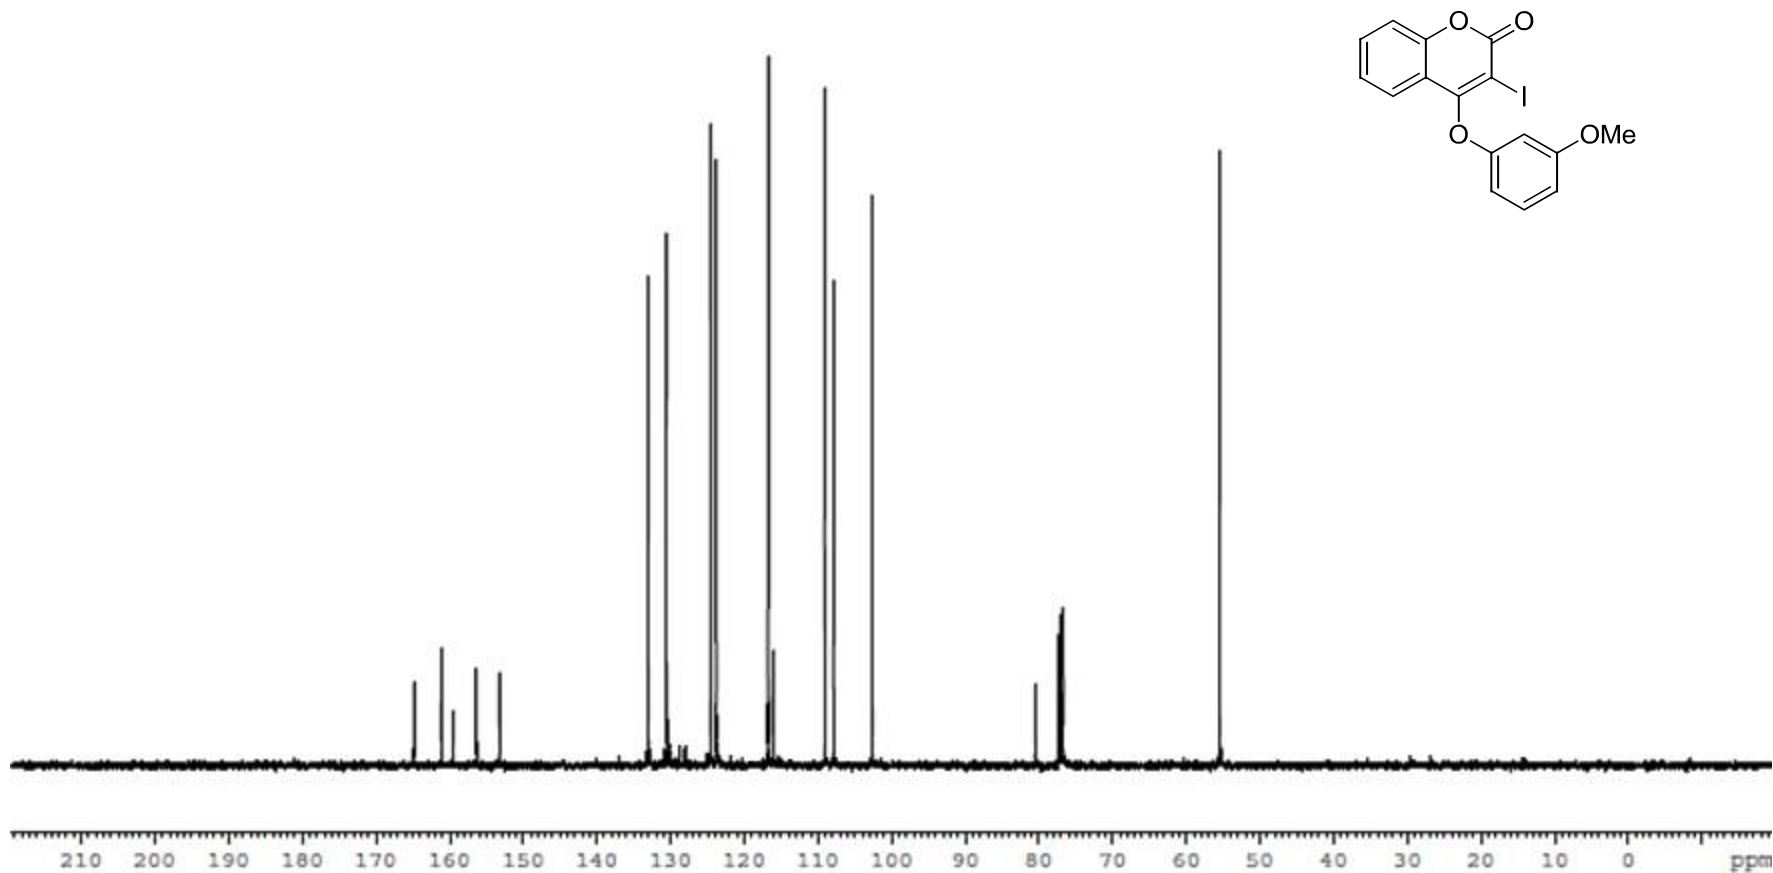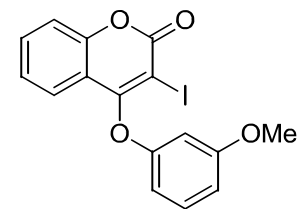

# <sup>1</sup>H of 4-(3-(benzyloxy)phenoxy)-3-iodo-2H-chromen-2-one (3ea)

<sup>1</sup>H of NP-IM-3FA

7.614  
7.596  
7.577  
7.535  
7.515  
7.433  
7.411  
7.402  
7.383  
7.367  
7.348  
7.333  
7.327  
7.317  
7.260  
7.241  
7.221  
7.202  
7.183  
6.773  
6.769  
6.753  
6.749  
6.590  
6.563  
6.543

5.035

1.609

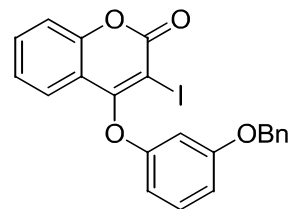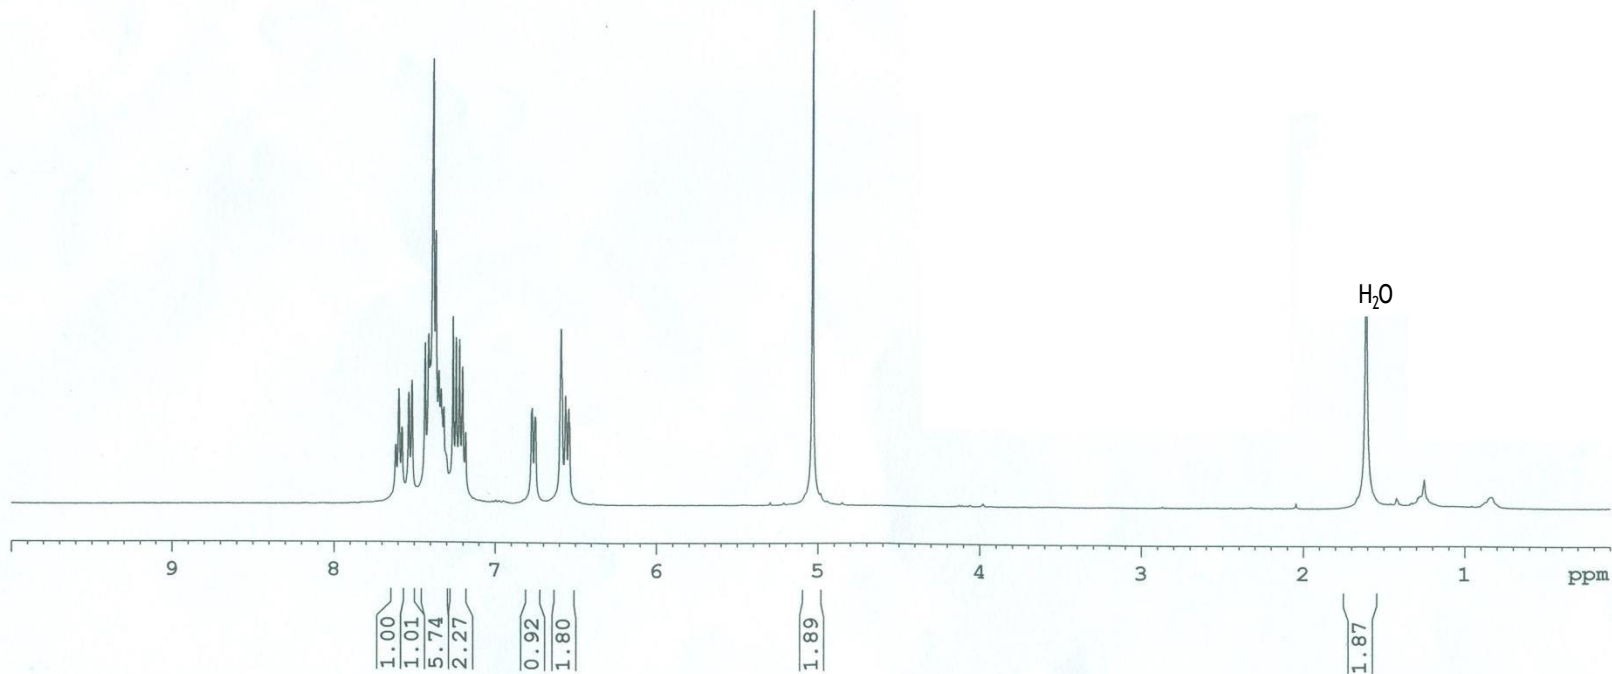

# <sup>13</sup>C of 4-(3-(benzyloxy)phenoxy)-3-iodo-2H-chromen-2-one (3ea)

<sup>13</sup>C of NP-IM-1300 27.2.2017

164.85  
160.21  
159.49  
156.33  
153.26  
136.20  
133.03  
130.60  
128.57  
128.10  
127.46  
124.62  
123.79  
116.80  
116.12  
109.92  
108.36  
103.43  
80.67  
77.33  
77.01  
76.69  
70.23

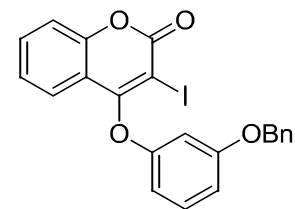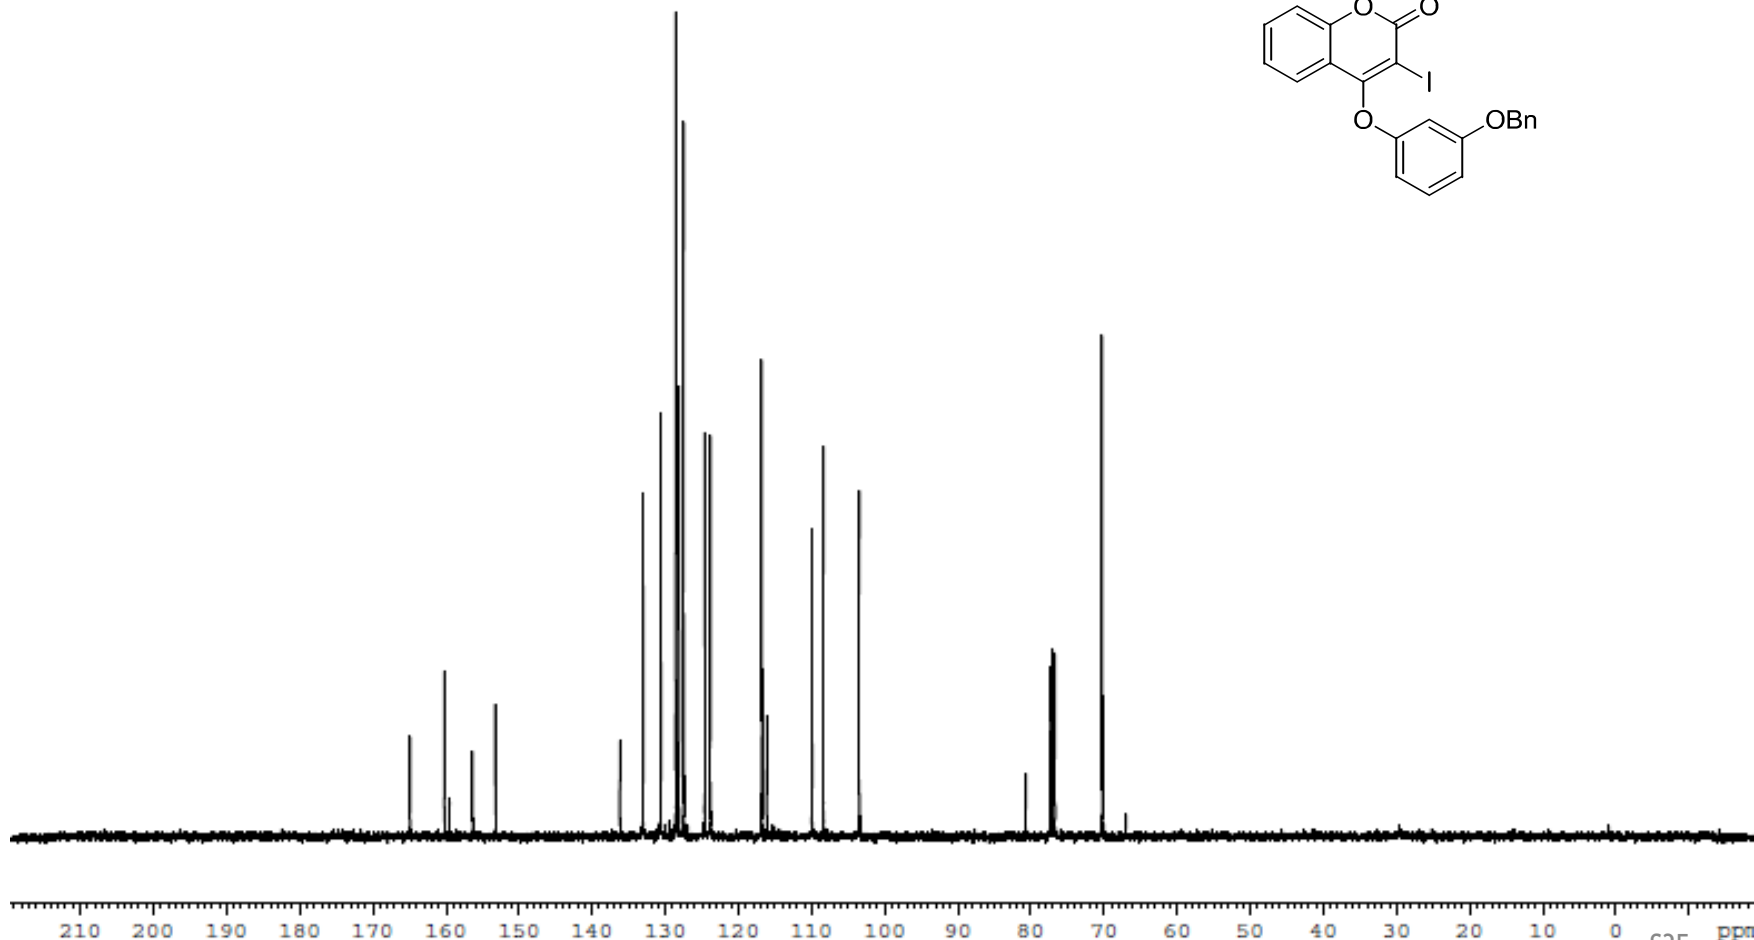

# <sup>1</sup>H of 3-iodo-4-(4-nitrophenoxy)-2H-chromen-2-one (3fa)

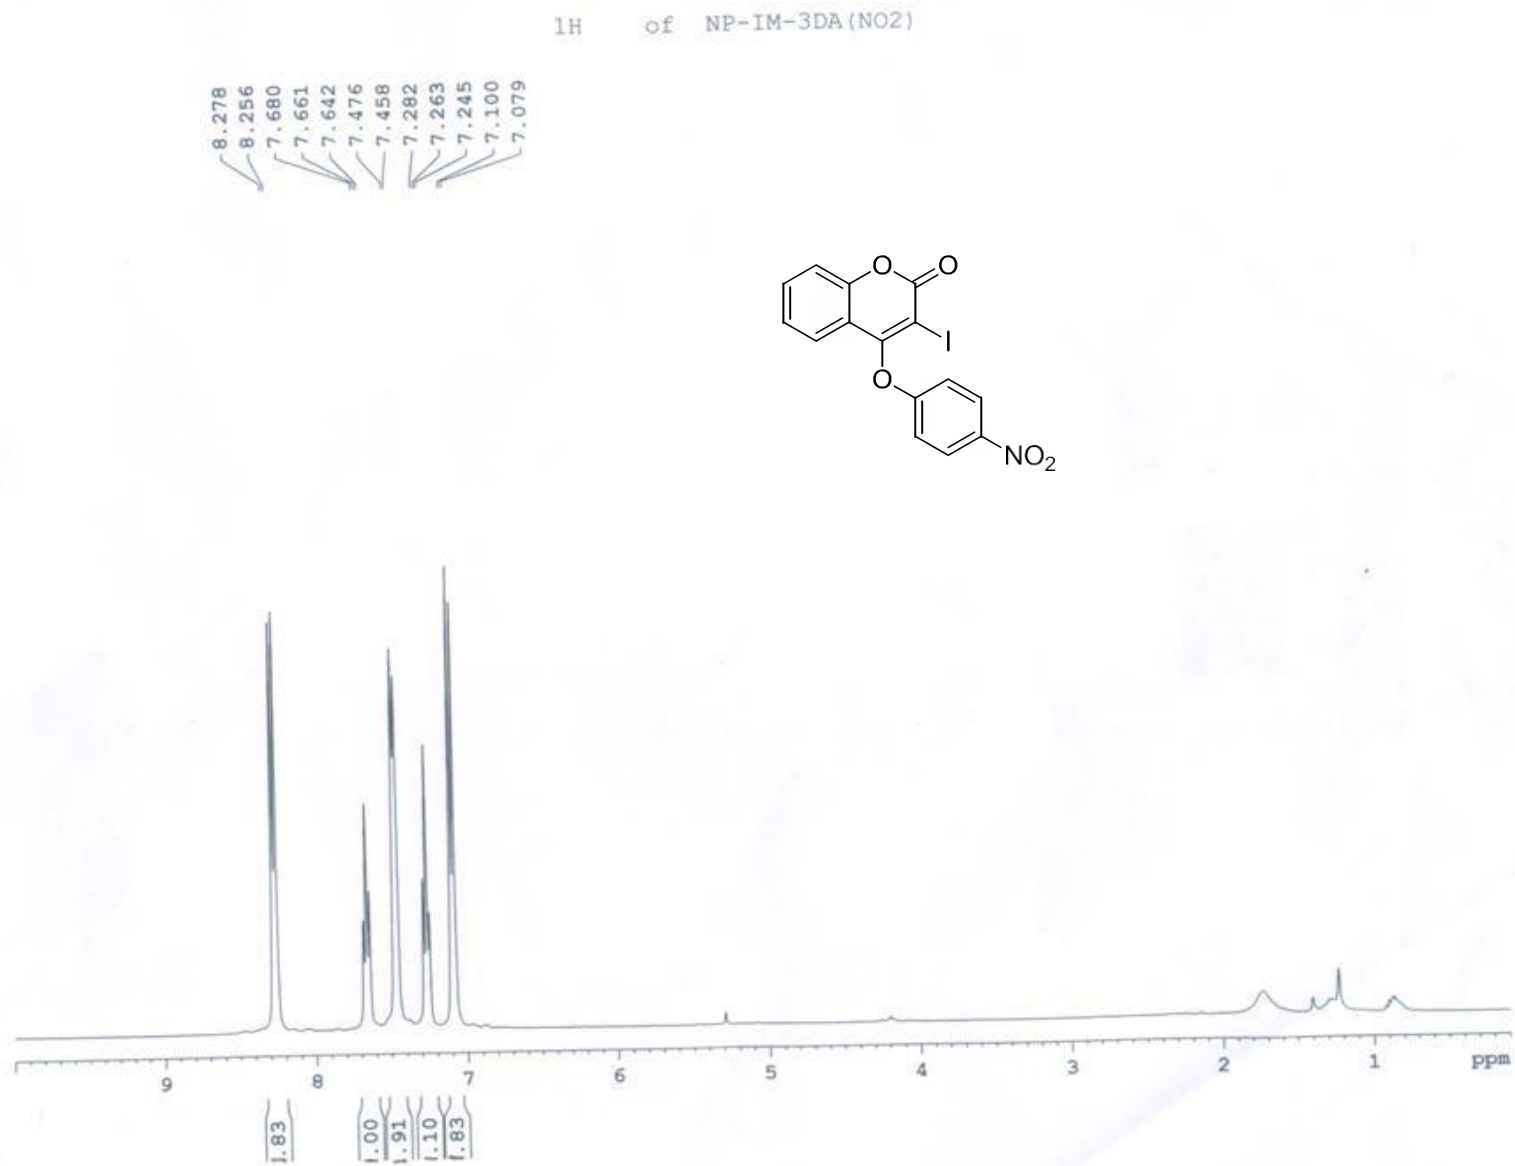

# <sup>13</sup>C of 3-iodo-4-(4-nitrophenoxy)-2H-chromen-2-one (3fa)

<sup>13</sup>C of NP-IM-1297 27.2.2017

163.84  
159.40  
158.91  
153.27  
143.69  
133.64  
126.33  
124.98  
123.11  
117.11  
116.18  
115.51  
81.28  
77.27  
76.95  
76.63

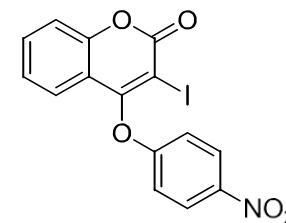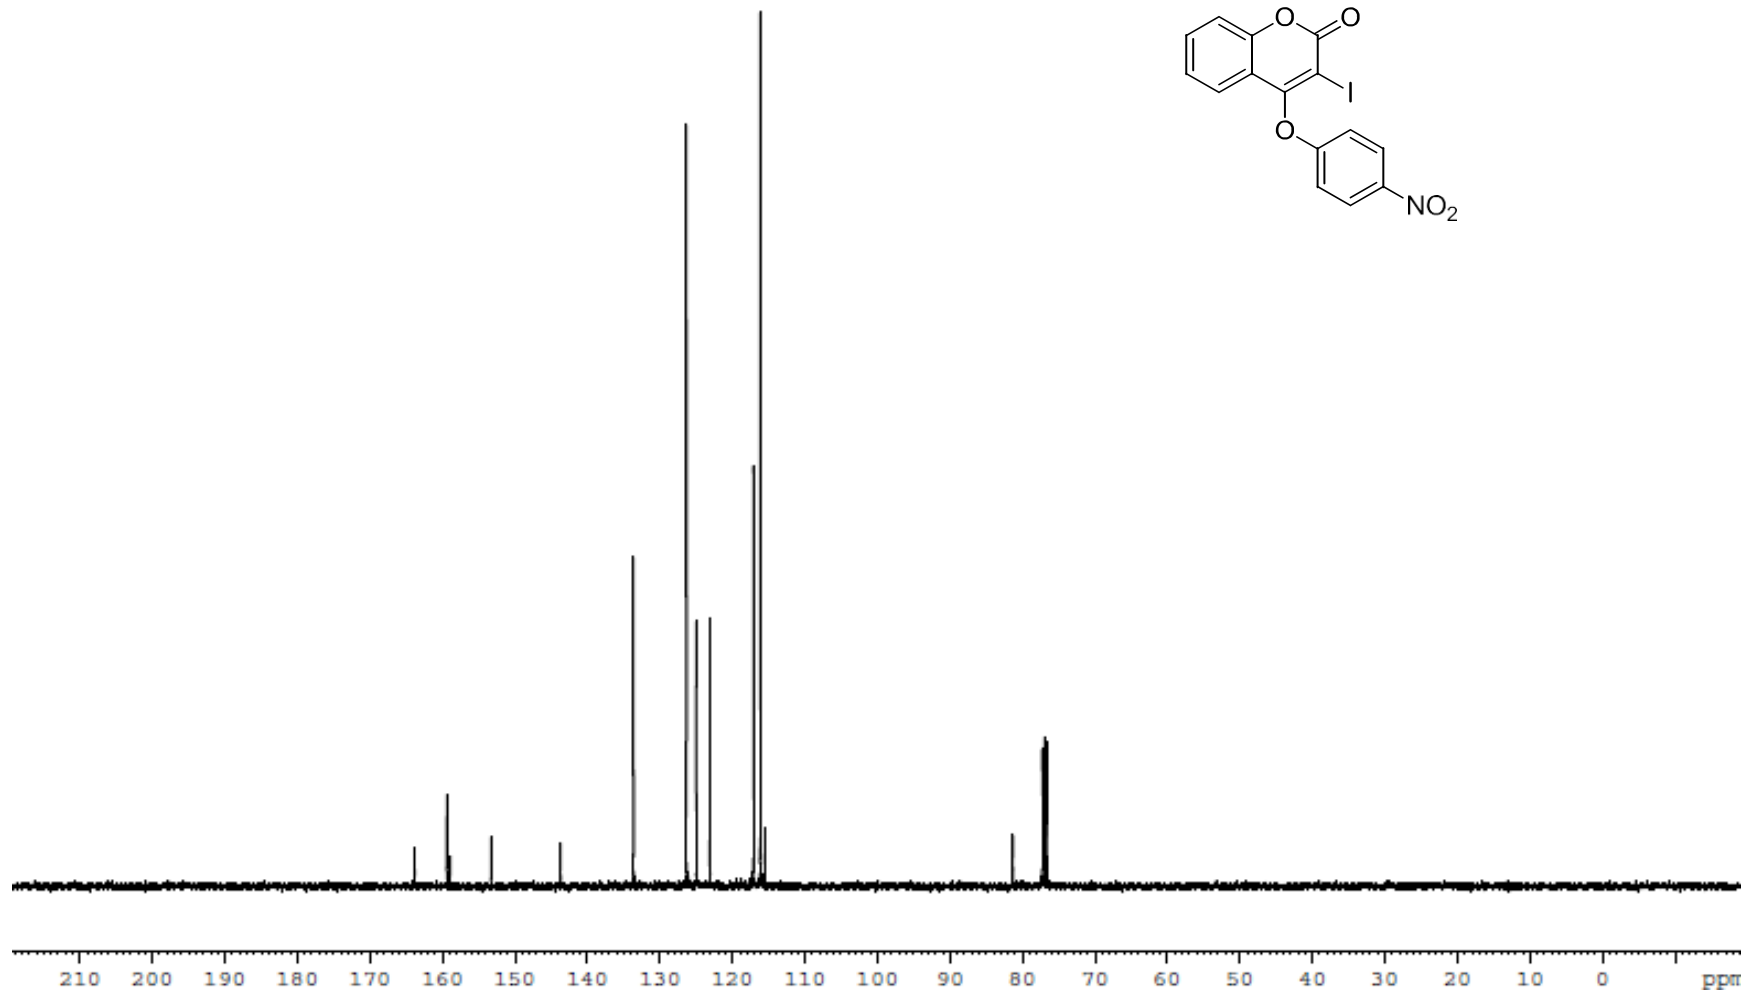

# <sup>1</sup>H of 6H-benzofuro[3,2-c]chromen-6-one (4aa)

<sup>1</sup>H of NP-IM-599 22.4.2015

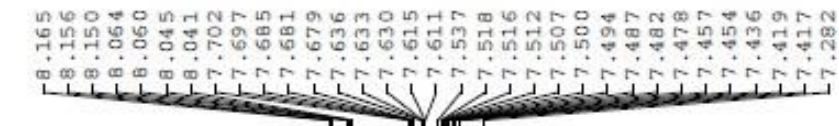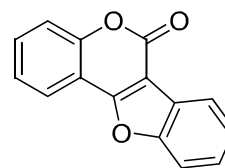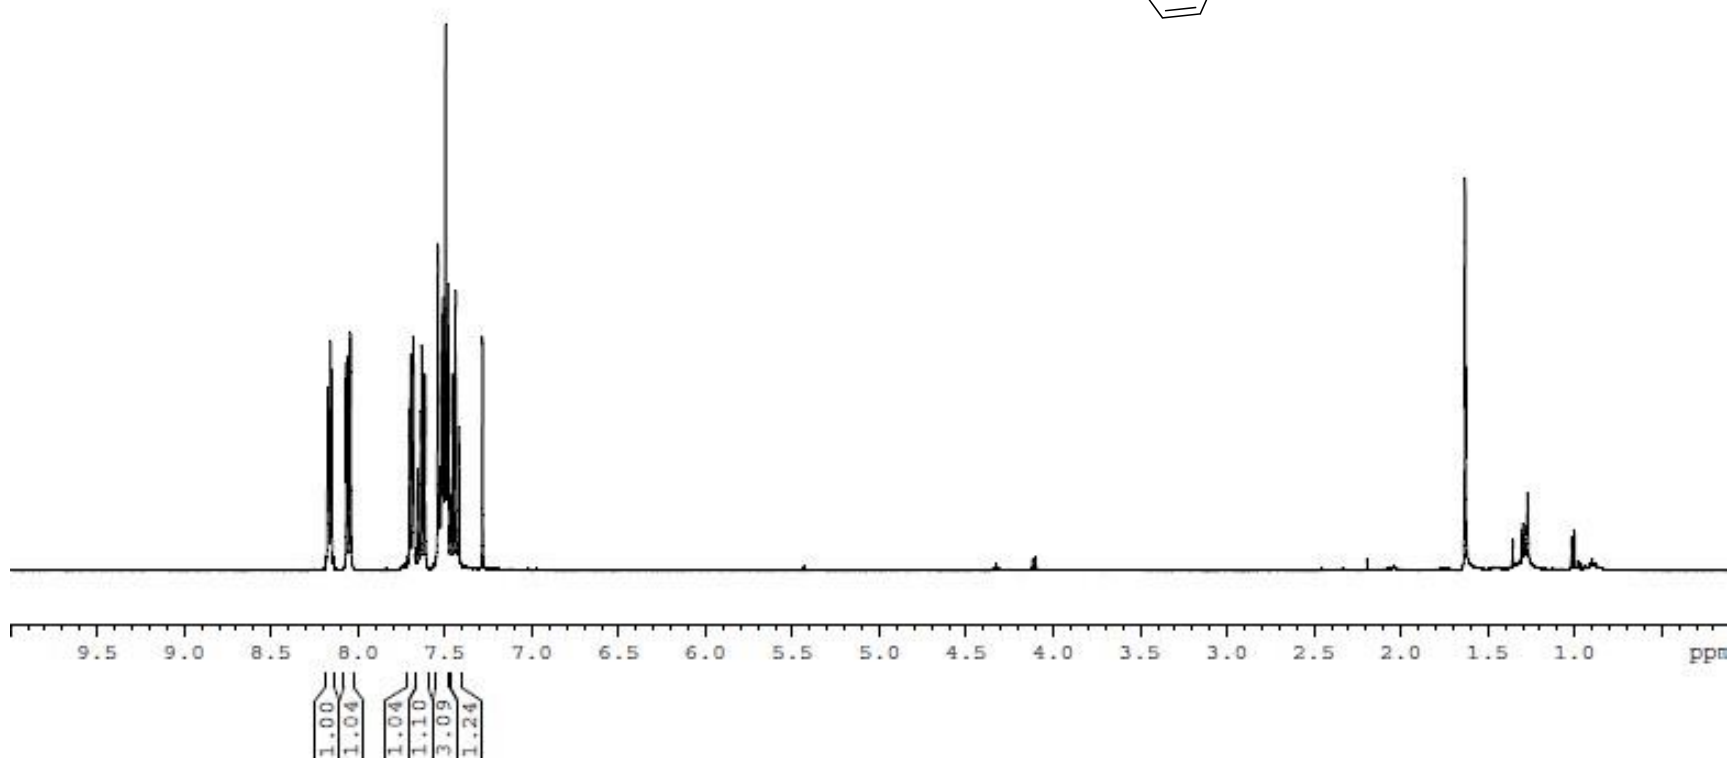

# <sup>13</sup>C of 6H-benzofuro[3,2-c]chromen-6-one (4aa)

<sup>13</sup>C of NP-IM-599

22.4.2015

159.94  
158.02  
155.46  
153.61

131.87  
126.71  
125.16  
124.59  
123.37  
121.81  
117.44  
112.58  
111.69  
105.83

77.28  
77.16  
76.96  
76.64

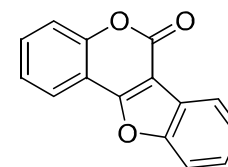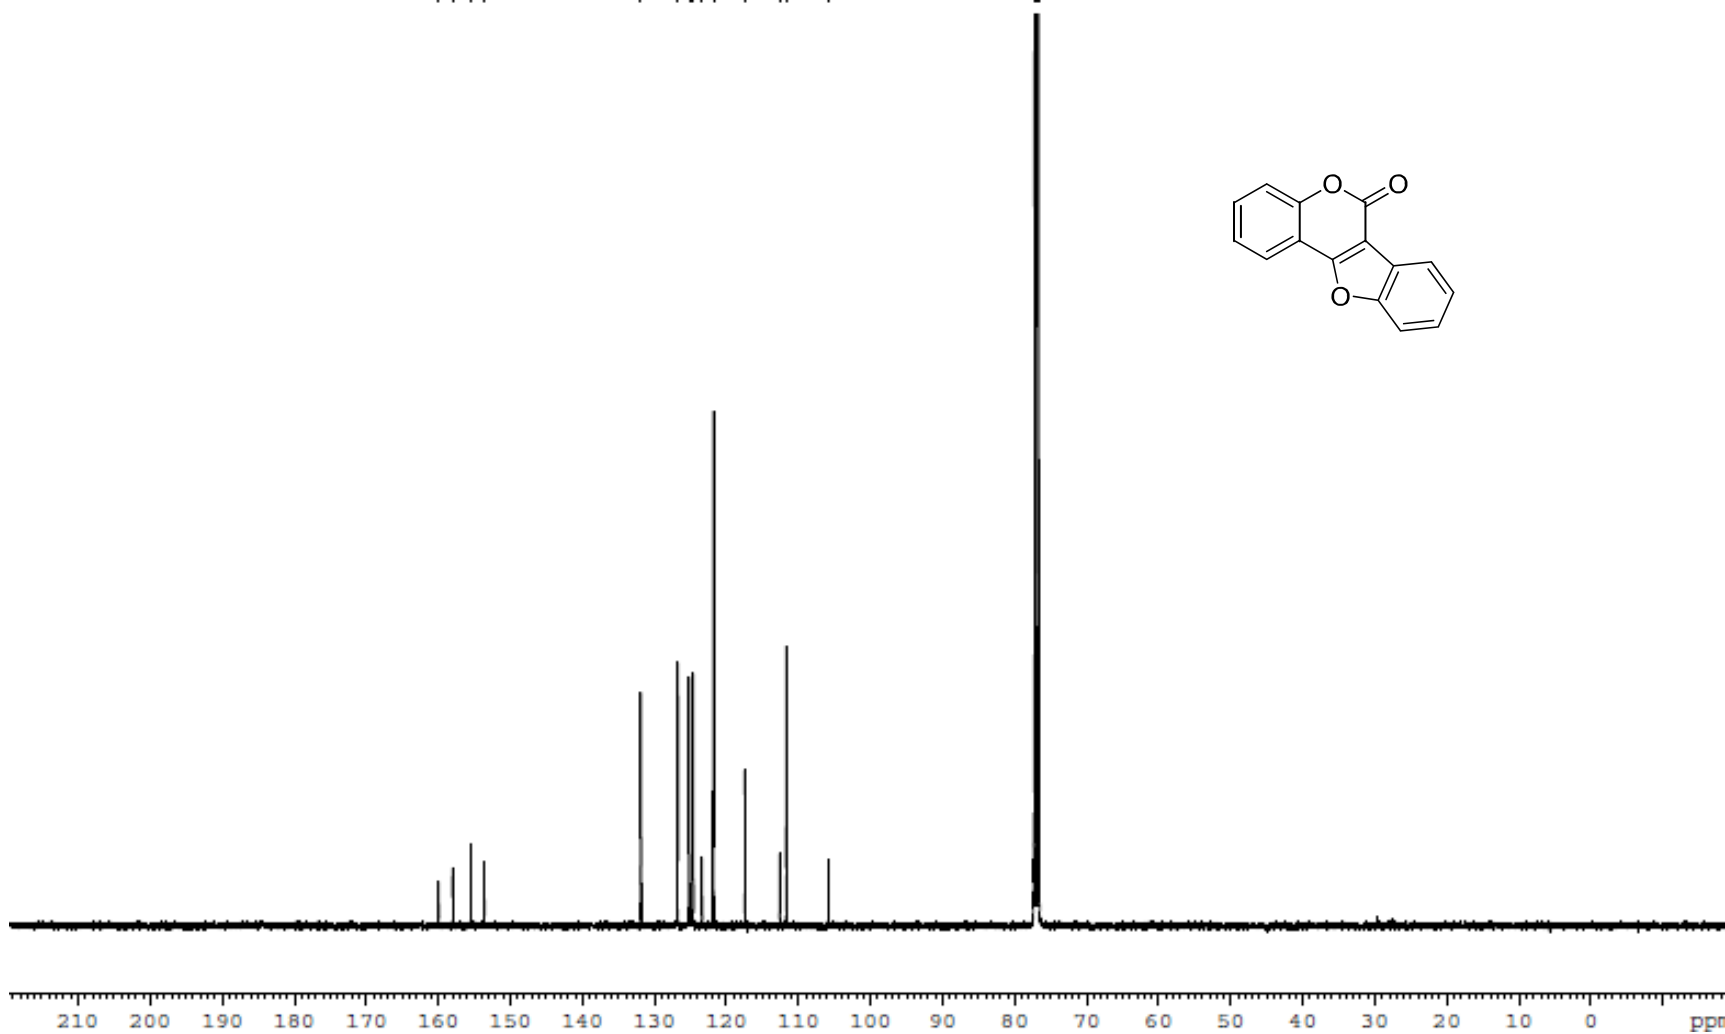

# <sup>1</sup>H of methyl-6H-benzofuro[3,2-c]chromen-6-one (4ab)

<sup>1</sup>H of NP-IM-1205 14.12.2016

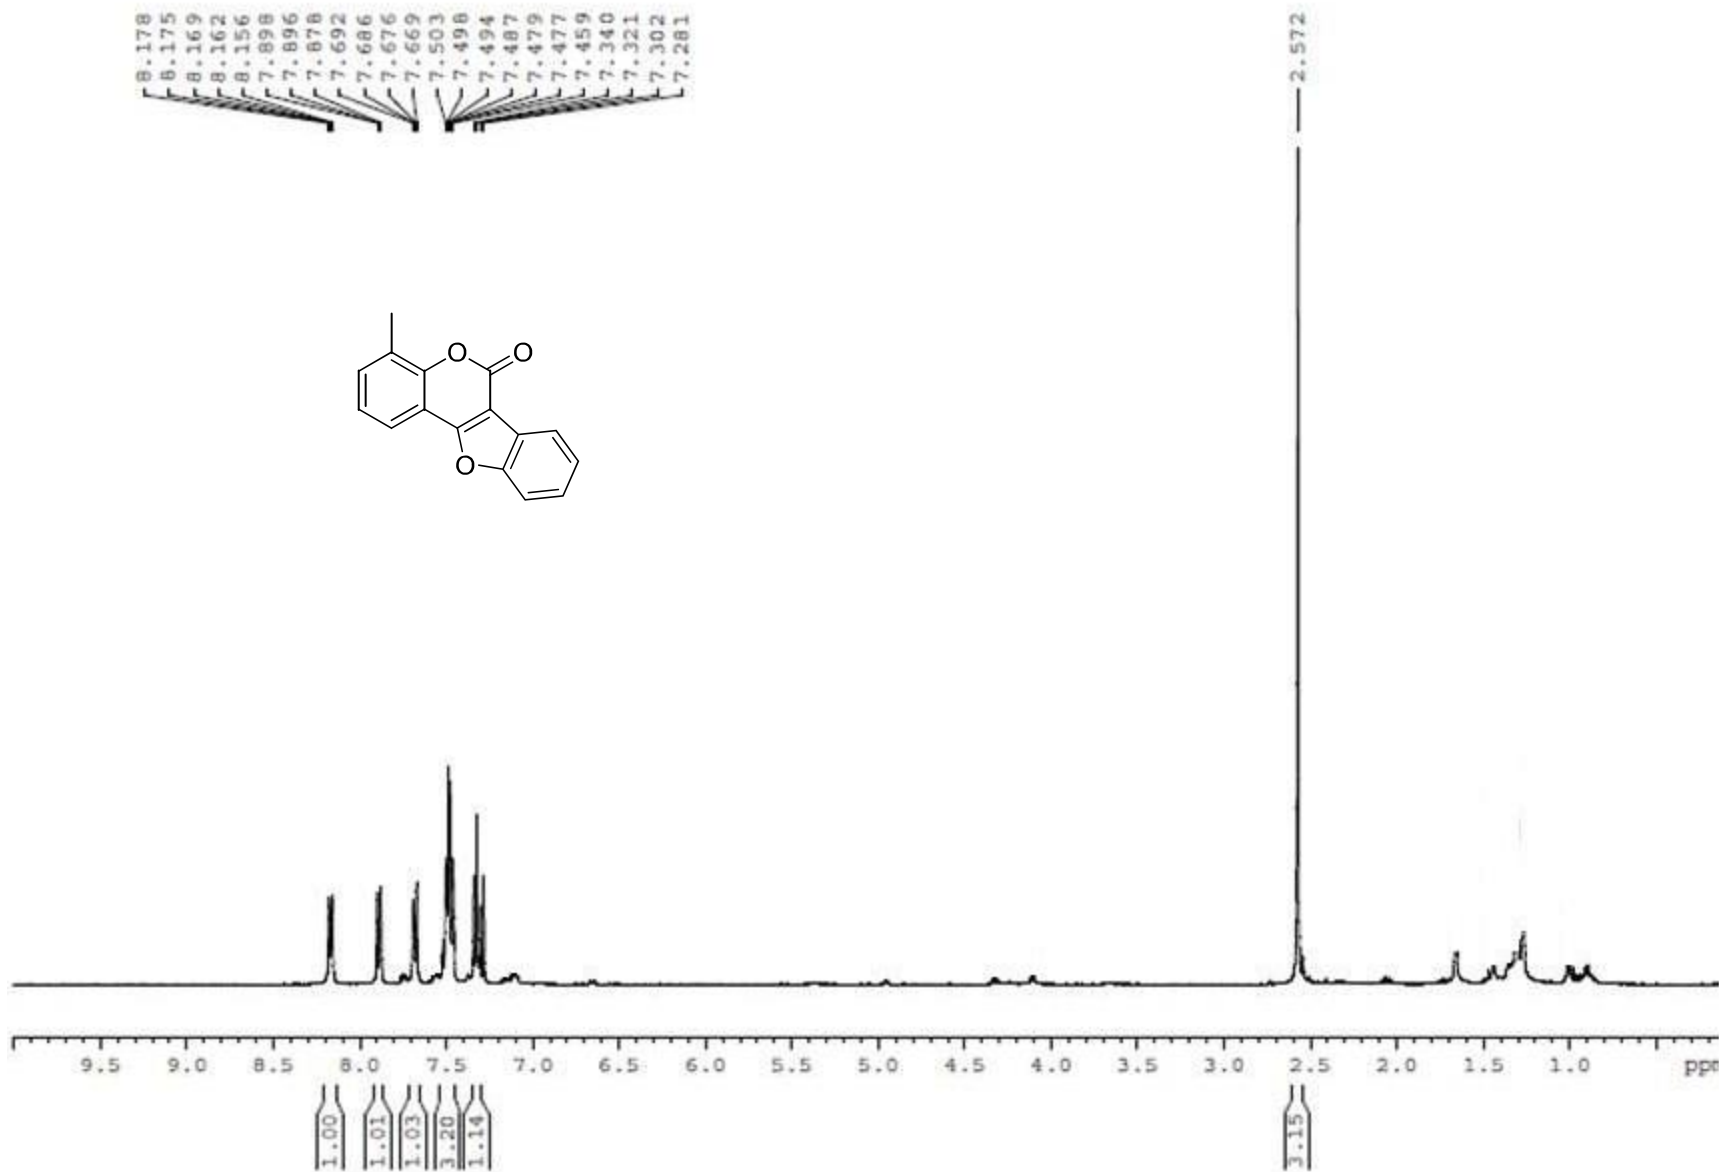



# <sup>13</sup>C of methyl-6H-benzofuro[3,2-c]chromen-6-one (4ab)

<sup>13</sup>C of NP-IM-1205

14.12.2016

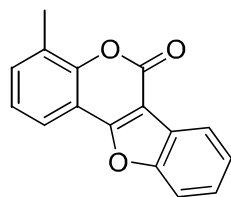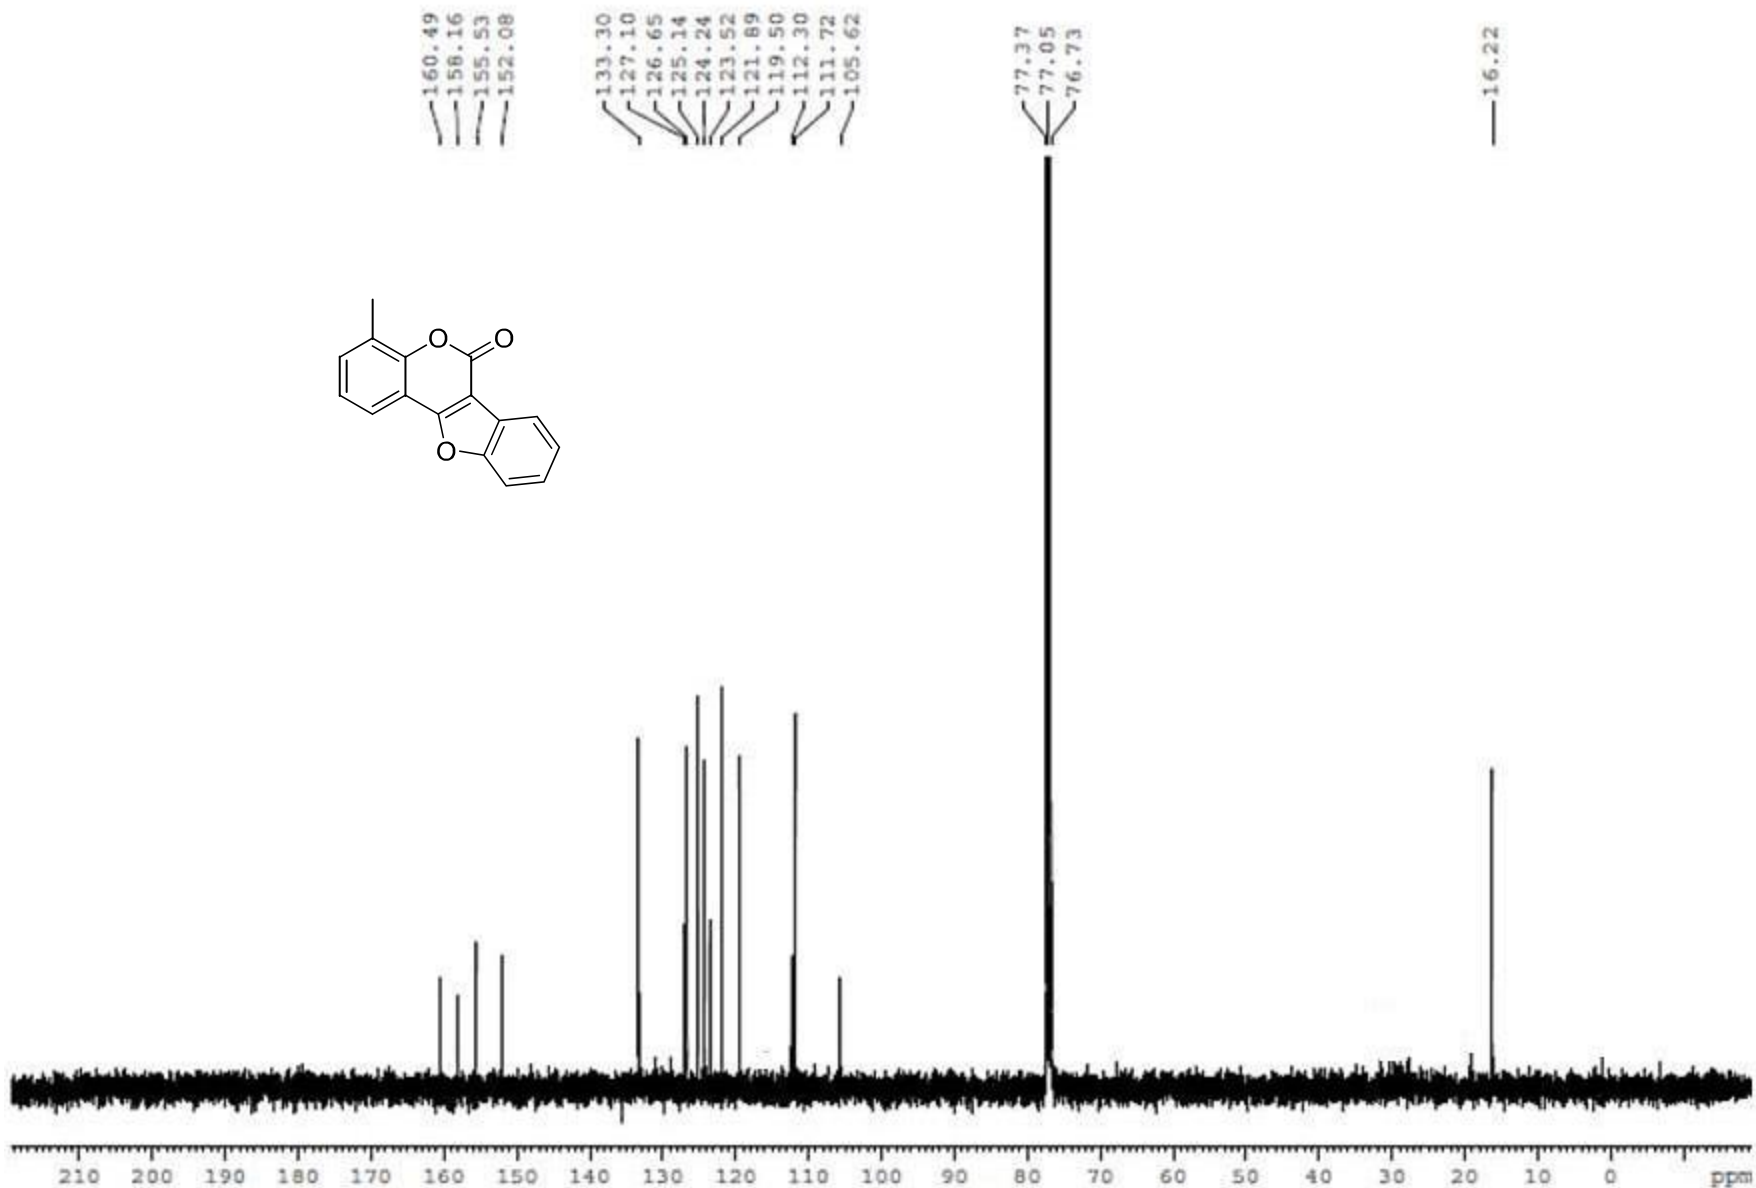

# <sup>1</sup>H of 2-methyl-6H-benzofuro[3,2-c]chromen-6-one (4ac)

<sup>1</sup>H of NP-IM-1206 14.12.2016

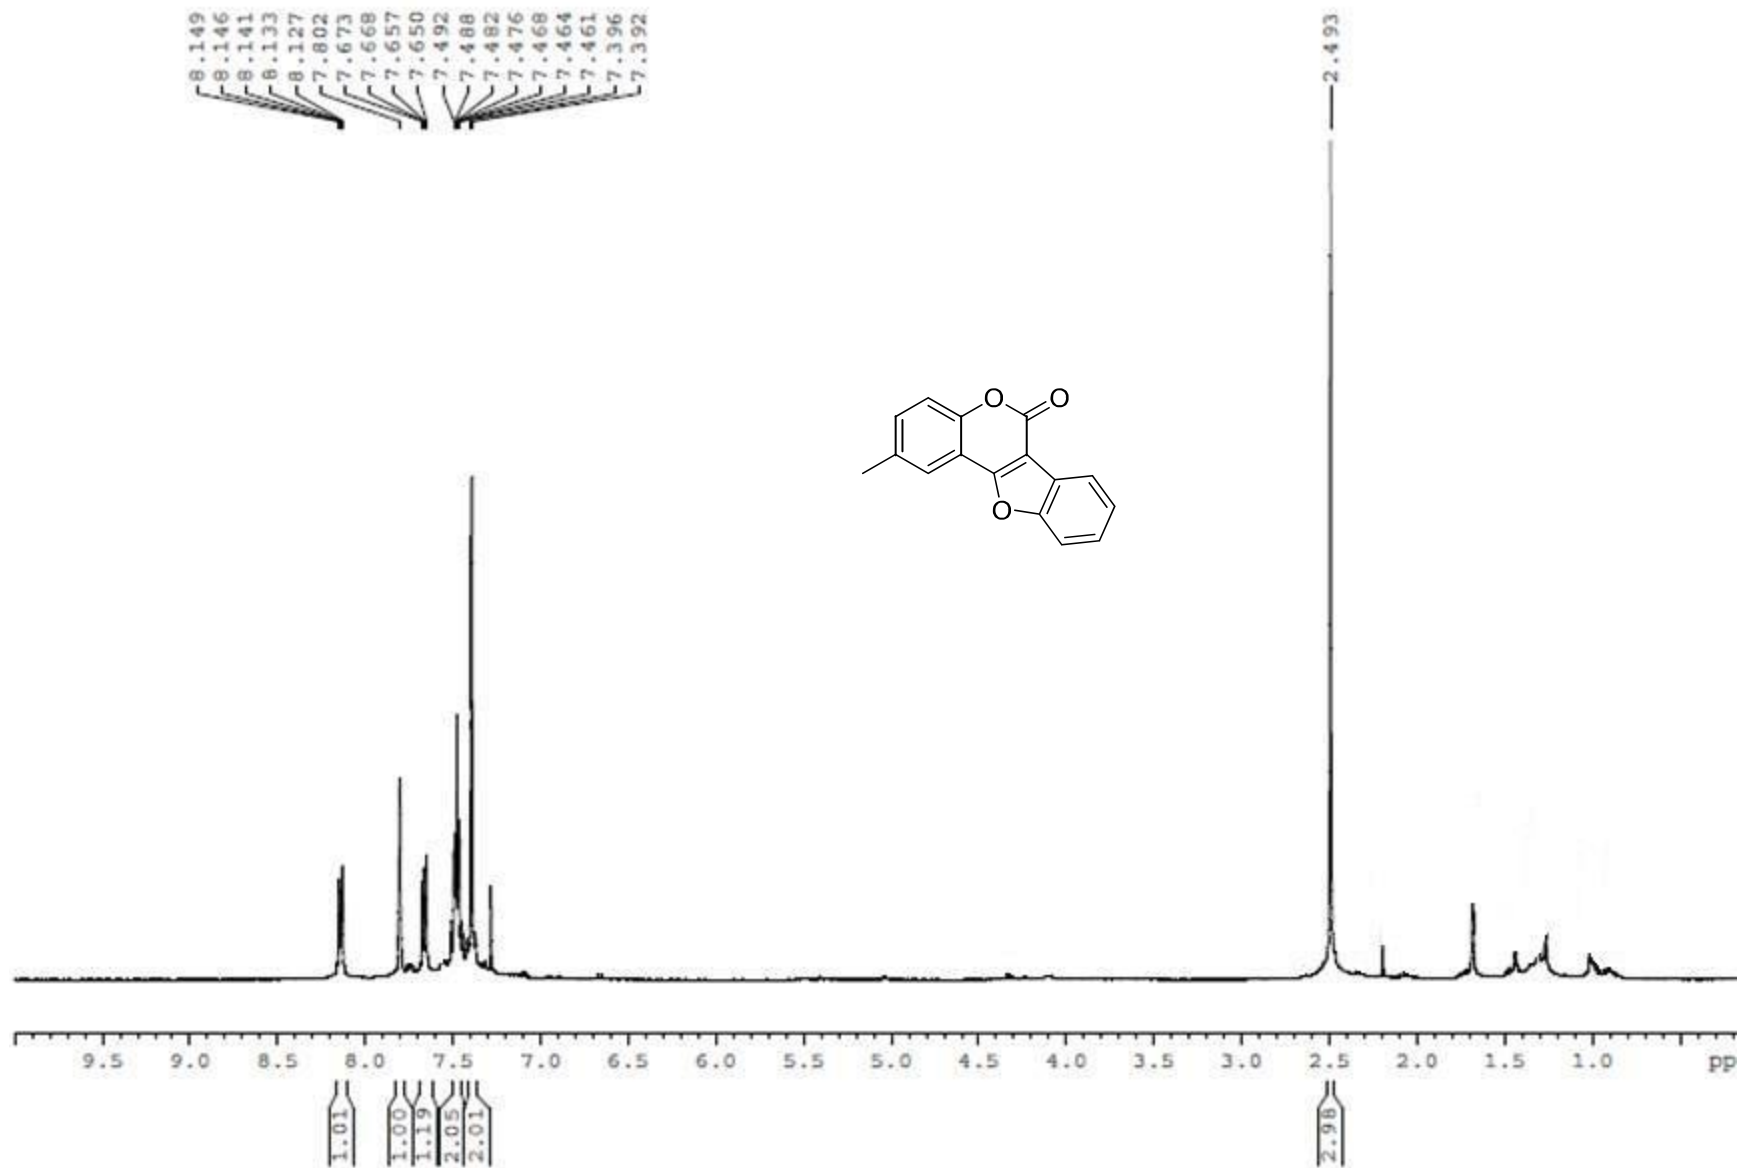

# <sup>13</sup>C of 2-methyl-6H-benzofuro[3,2-c]chromen-6-one (4ac)

<sup>13</sup>C of NP-IM-1206

14.12.2016

160.05  
158.32  
155.45  
151.86

134.58  
133.04  
126.66  
125.17  
123.51  
121.82  
121.51  
117.20  
112.24  
111.70  
105.73

77.37  
77.06  
76.74

20.99

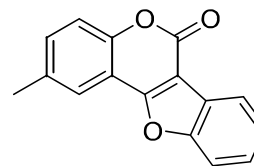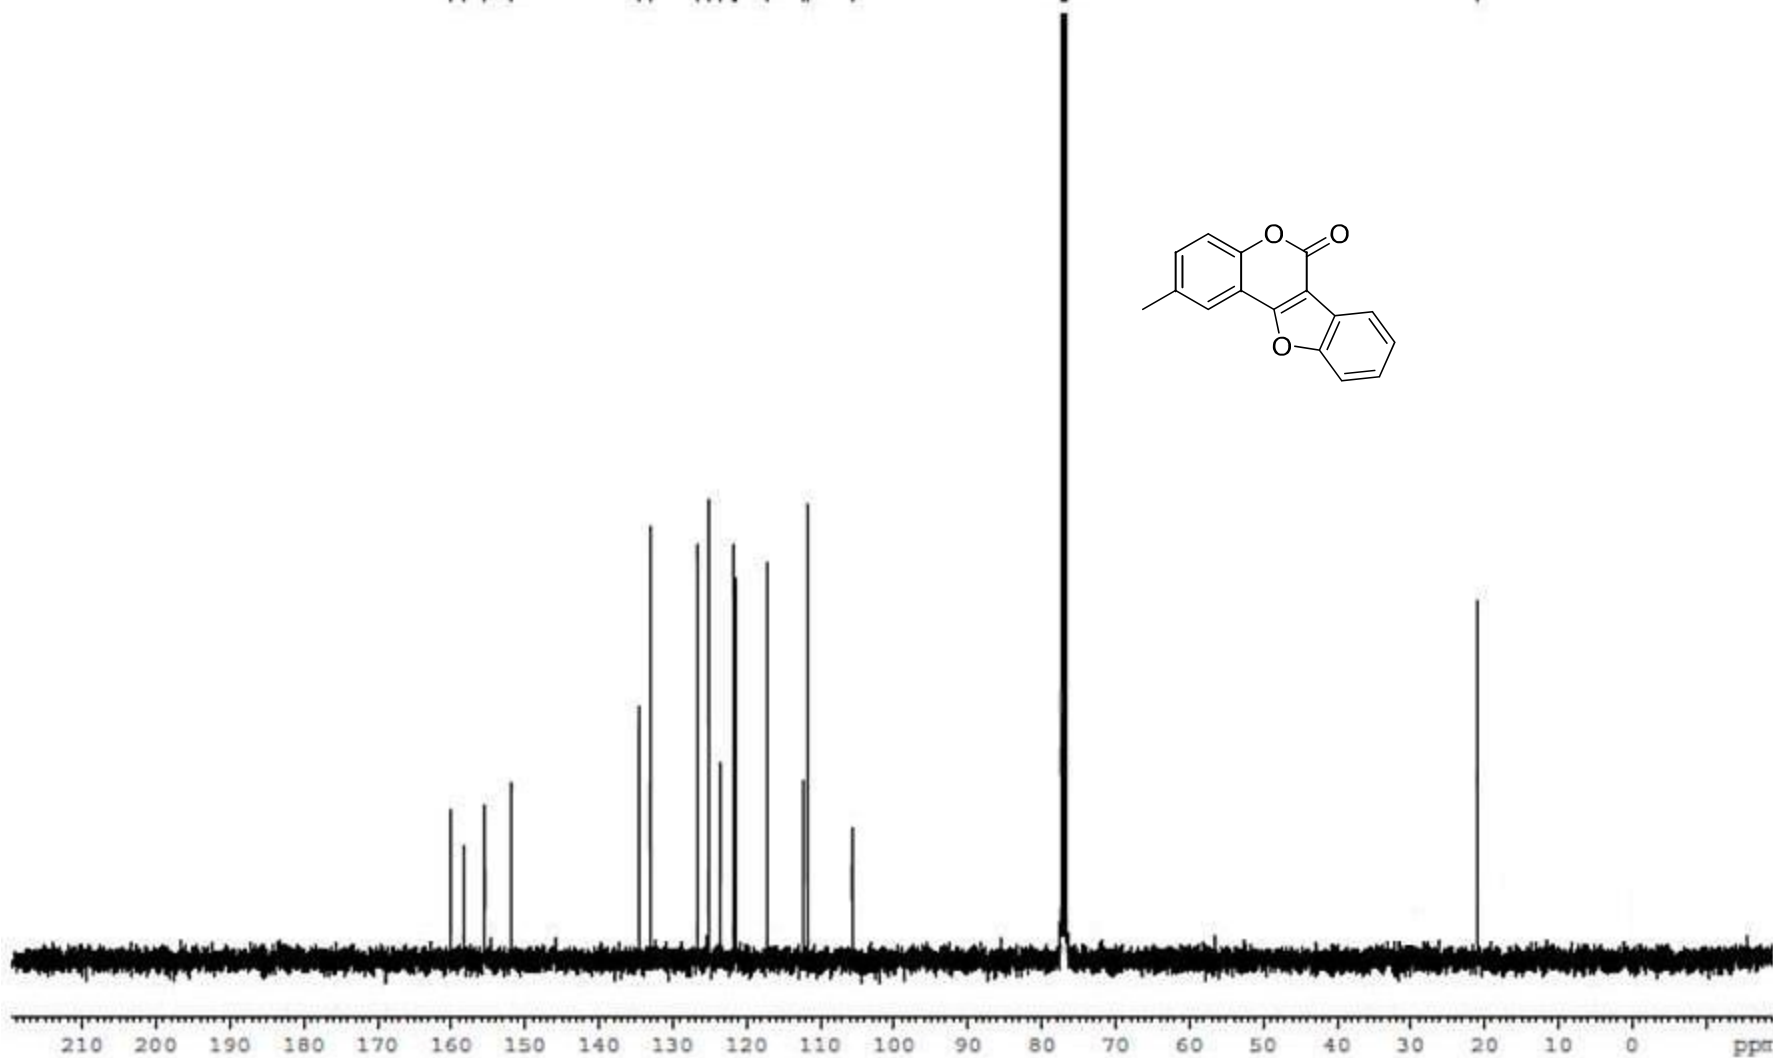

# <sup>1</sup>H of 2-chloro-6H-benzofuro[3,2-c]chromen-6-one (4ad)

<sup>1</sup>H of NP-IM-4AD

8.165  
8.147  
8.028  
7.701  
7.681  
7.573  
7.550  
7.528  
7.509  
7.491  
7.473  
7.451  
7.258

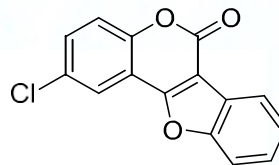

1.583  
H<sub>2</sub>O

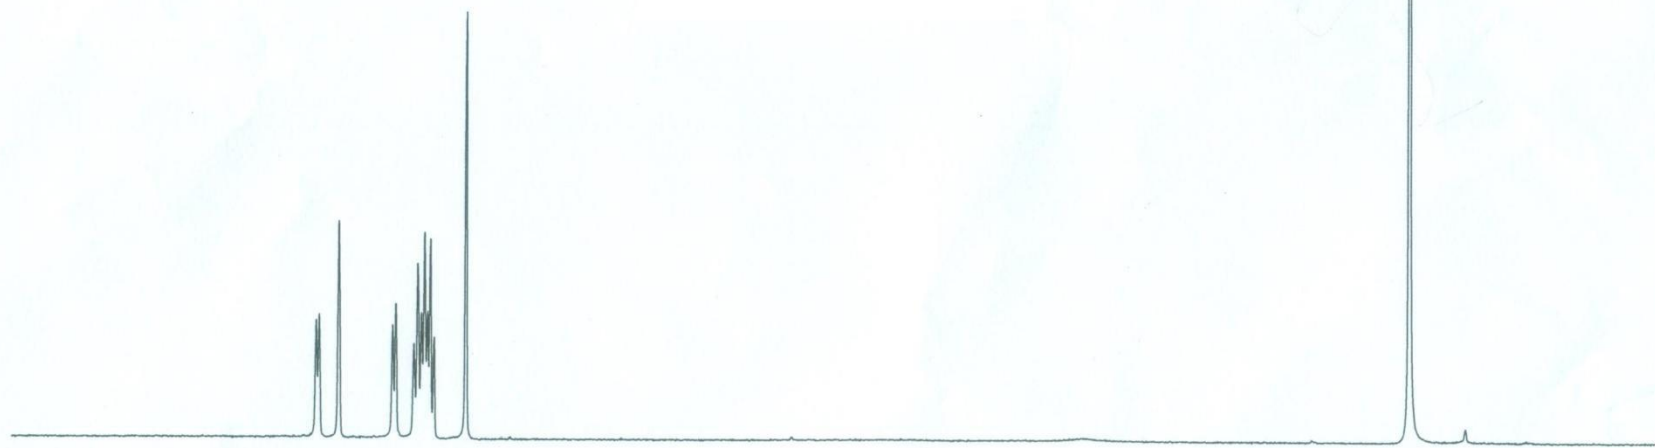

1.00  
0.95  
1.05  
4.06

6.32

<sup>13</sup>C of 2-chloro-6H-benzofuro[3,2-c]chromen-6-one (4ad)

<sup>13</sup>C of NP-IM-1207

15.12.2016

158.67  
157.52  
155.67  
151.95

131.90  
130.28  
127.27  
125.48  
123.18  
122.03  
121.38  
118.98  
113.74  
111.90

77.35  
77.03  
76.71

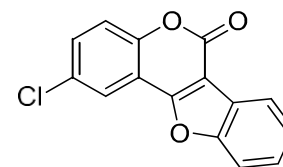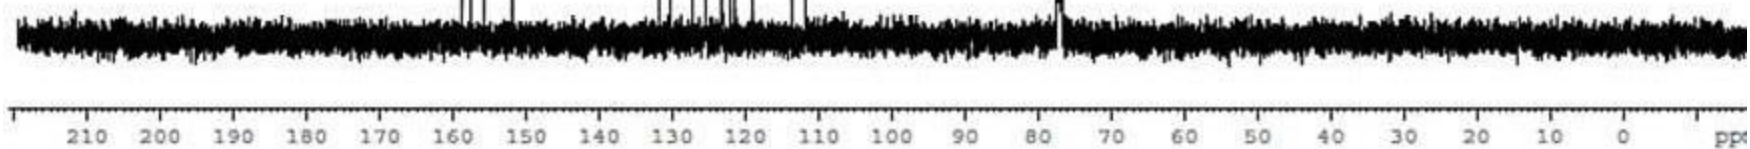

# <sup>1</sup>H of 3-methoxy-6H-benzofuro[3,2-c]chromen-6-one (4ae)

<sup>1</sup>H of NP-IM-4AE

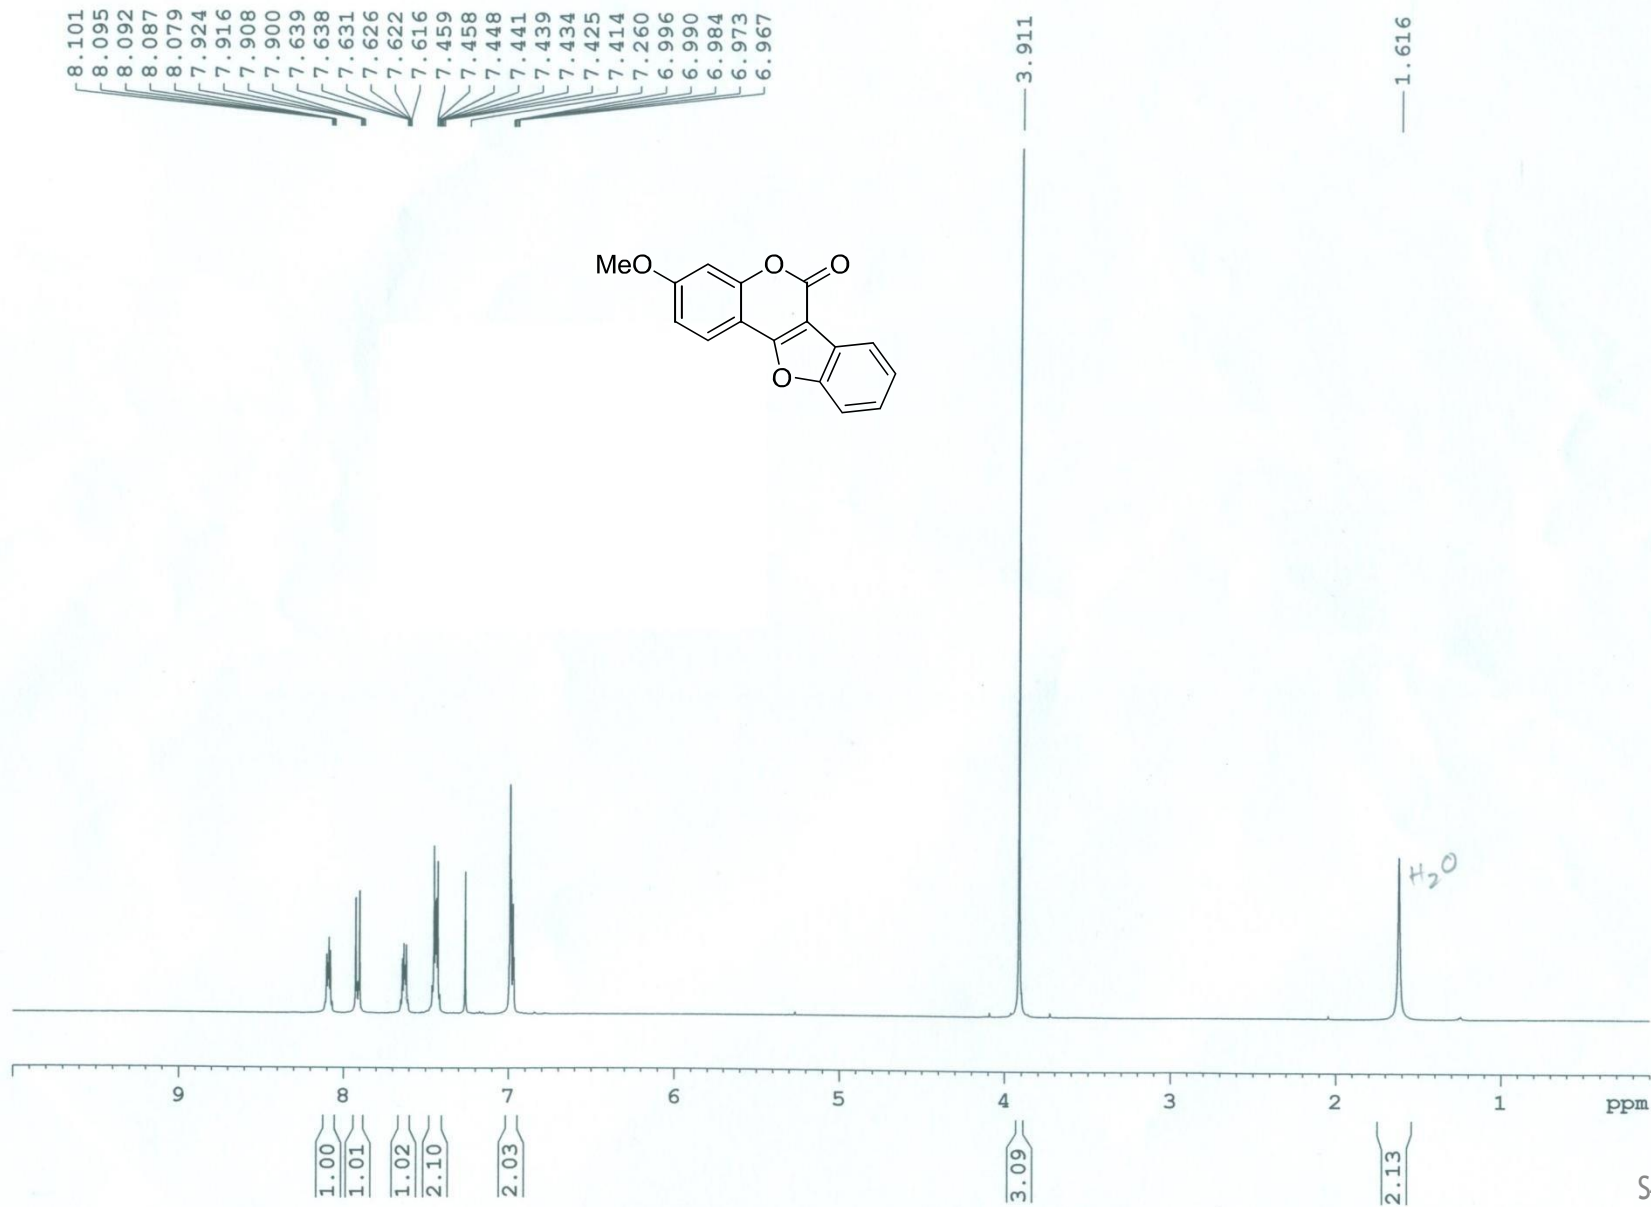

<sup>13</sup>C of 3-methoxy-6*H*-benzofuro[3,2-*c*]chromen-6-one (4ae)

<sup>13</sup>C of NP-IM-1274

31.1.2017

162.92  
158.25  
155.49  
155.12

130.24  
126.03  
124.96  
123.51  
122.75  
121.38  
121.23  
112.98  
111.42  
105.74  
101.31

77.24  
76.92  
76.60

55.73

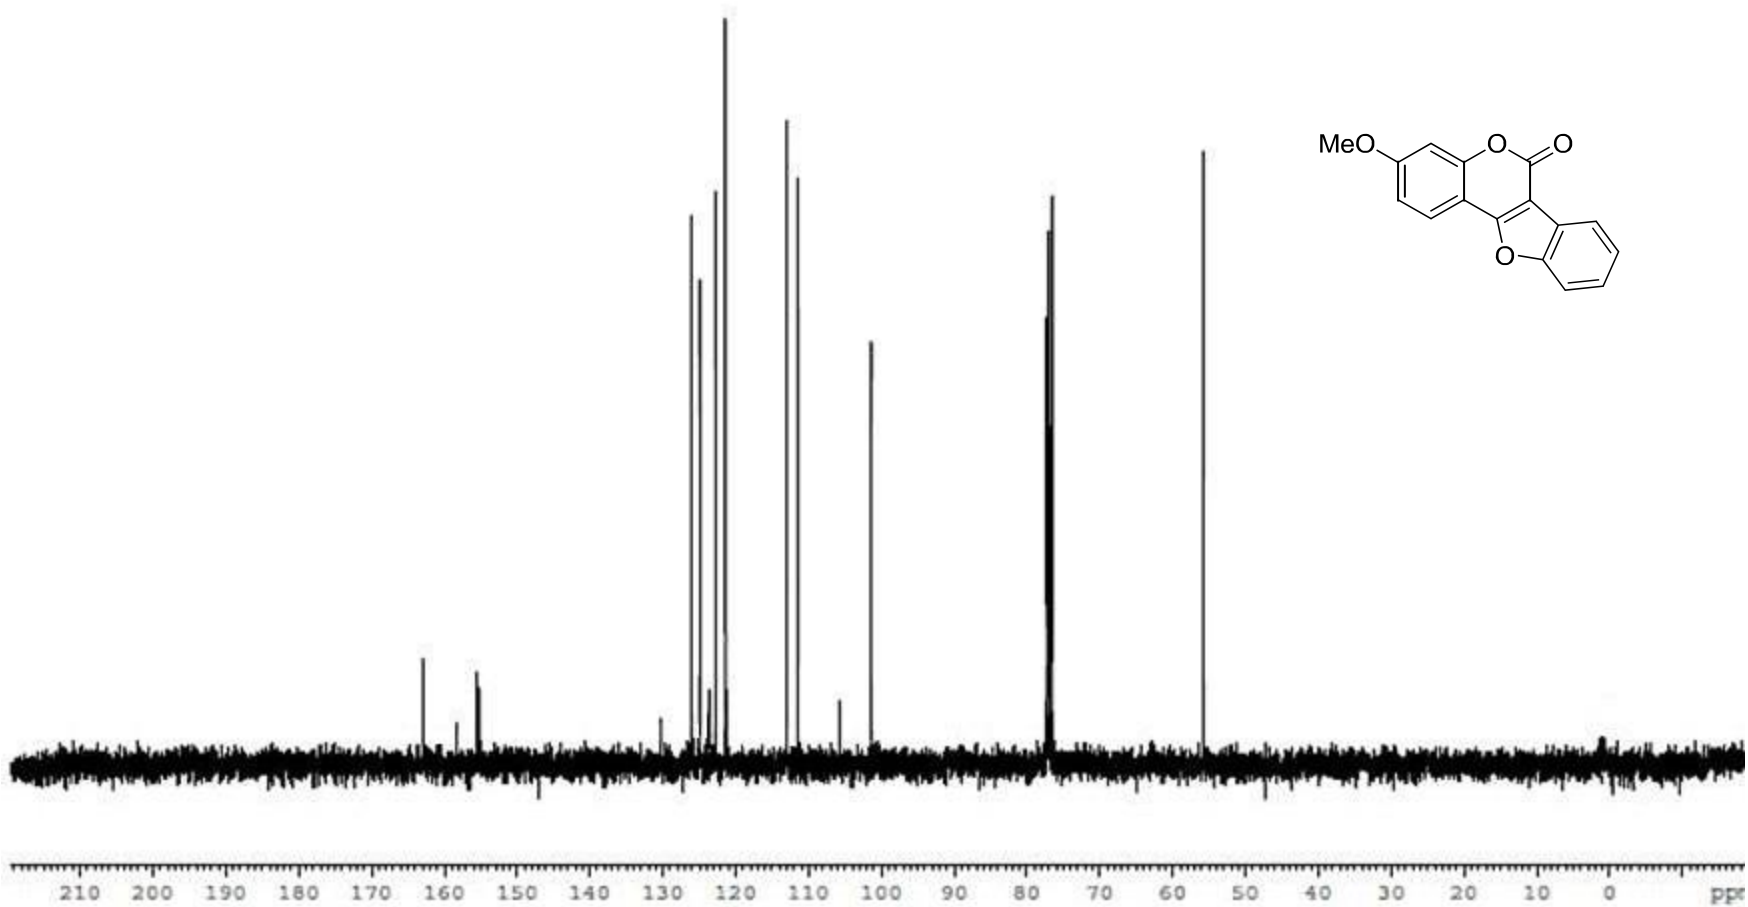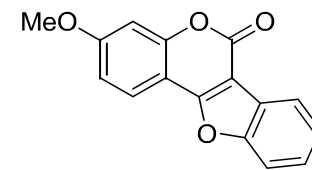

# <sup>1</sup>H of 2-methoxy-6*H*-benzofuro[3,2-*c*]chromen-6-one (4af)

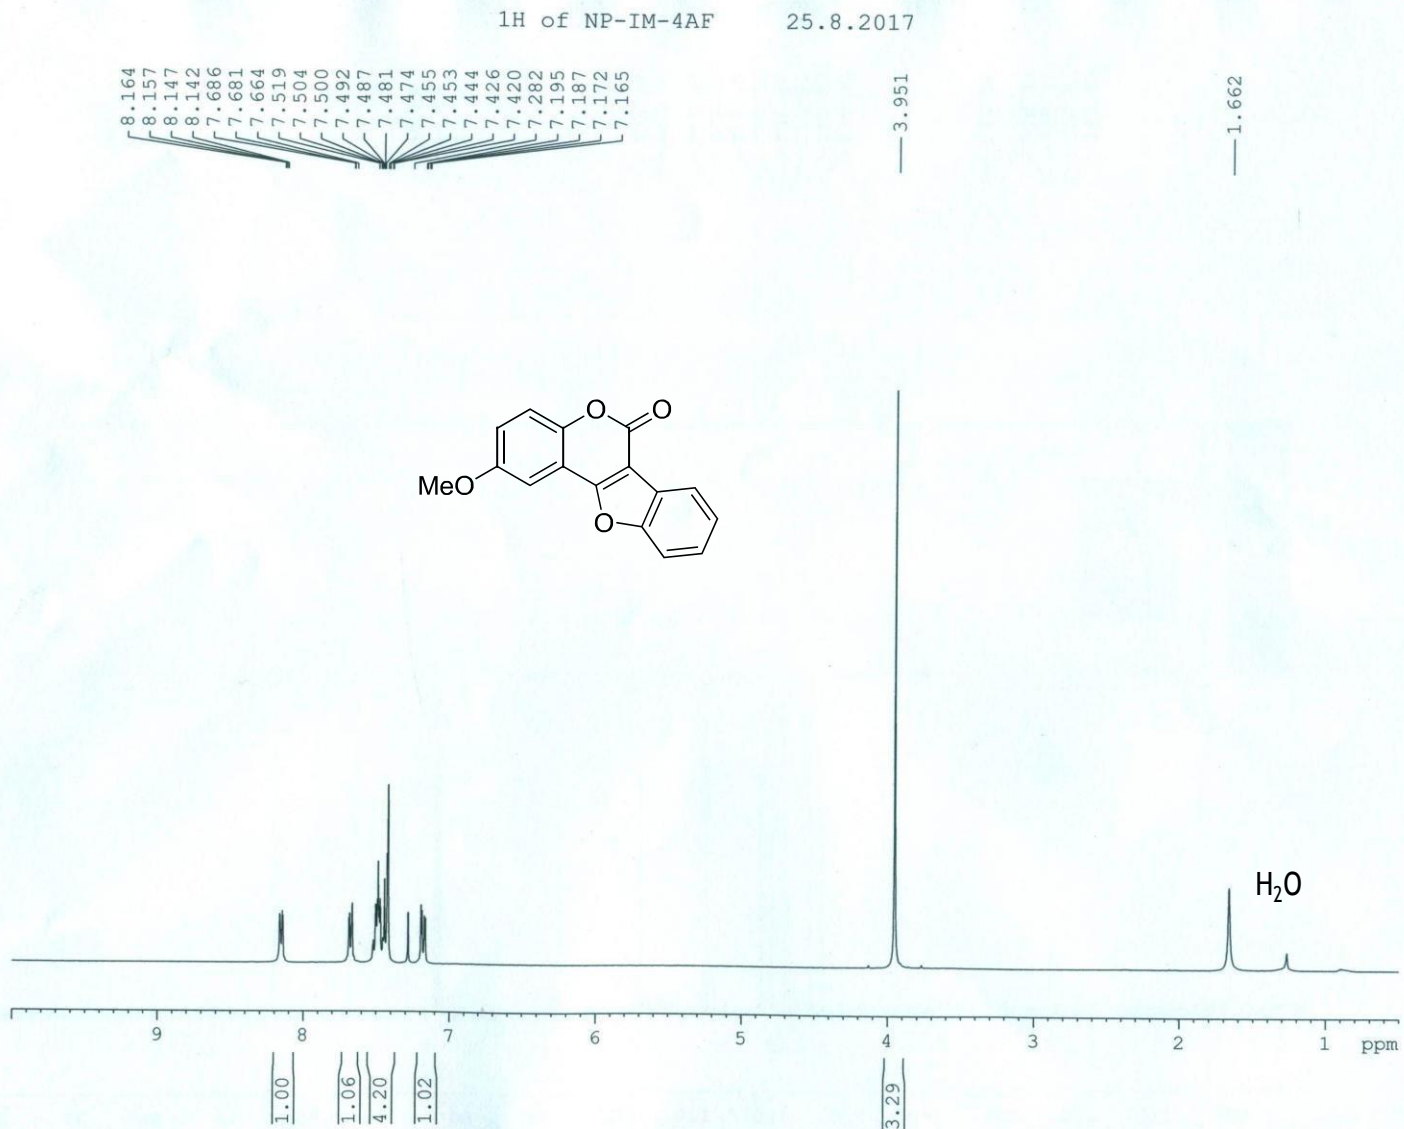



# <sup>13</sup>C of 2-methoxy-6H-benzofuro[3,2-c]chromen-6-one (4af)

<sup>13</sup>C of NP-IM-4AF 25.8.2017

159.89  
158.27  
156.32  
155.47  
— 148.20

126.79  
125.23  
123.50  
121.92  
120.29  
118.72  
112.79  
111.70  
— 106.00  
— 103.34

77.36  
77.04  
76.72

— 55.95

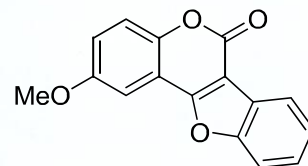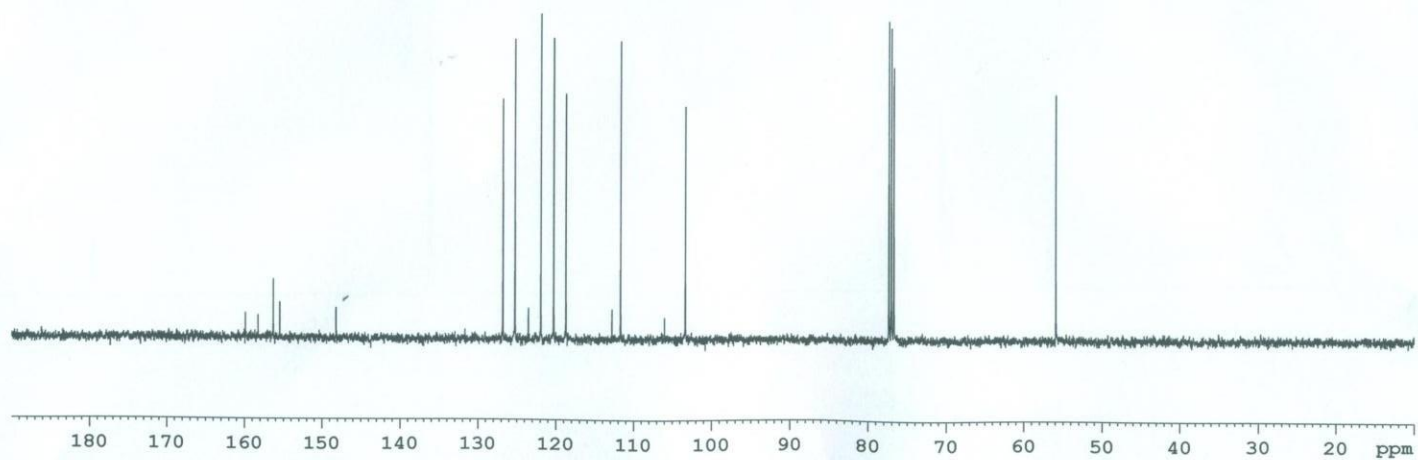

# <sup>1</sup>H of 3-(benzyloxy)-6H-benzofuro[3,2-c]chromen-6-one (4ag)

<sup>1</sup>H of NP-IM-4AG 29.8.2017

8.109  
8.095  
8.086  
7.944  
7.921  
7.647  
7.639  
7.631  
7.625  
7.470  
7.455  
7.450  
7.446  
7.441  
7.432  
7.423  
7.404  
7.389  
7.385  
7.380  
7.367  
7.260  
7.081  
7.075  
7.067  
7.062  
7.058  
7.052  
— 5.174

— 1.604

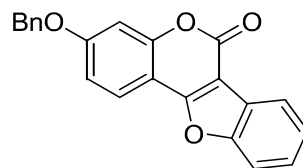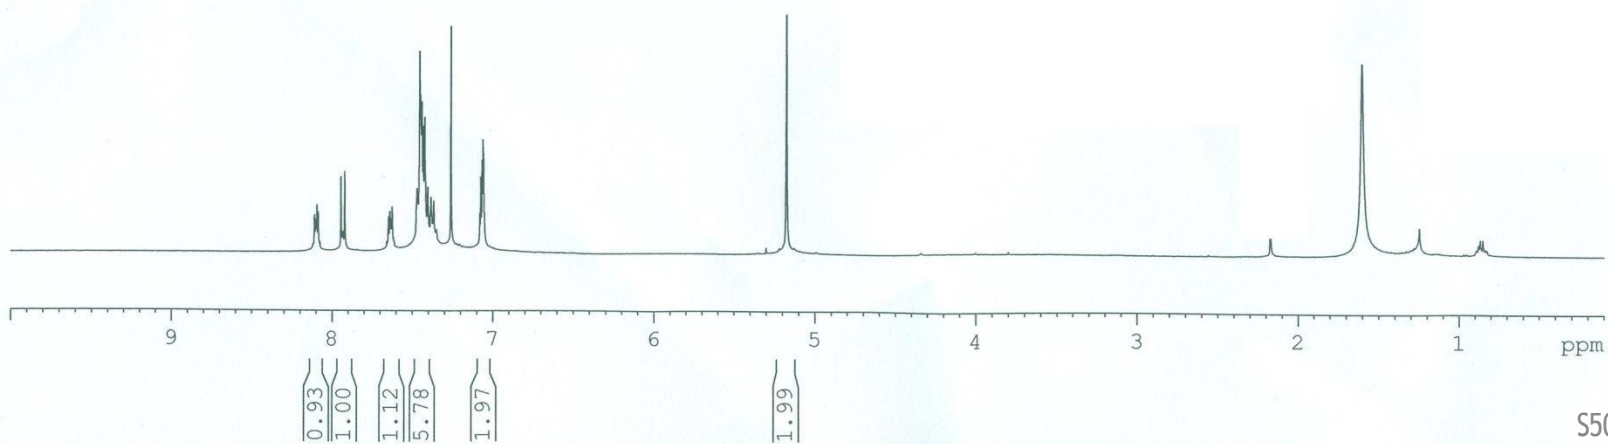

<sup>13</sup>C of 3-(benzyloxy)-6H-benzofuro[3,2-c]chromen-6-one (4ag)

<sup>13</sup>C of NP-IM-1264

31.1.2017

161.99  
160.52  
158.23  
155.42  
155.18

135.58  
128.67  
128.31  
127.41  
126.05  
124.97  
123.56  
122.78  
121.42  
113.62  
113.00  
111.42  
106.00  
102.44

77.21  
76.89  
76.57  
70.51

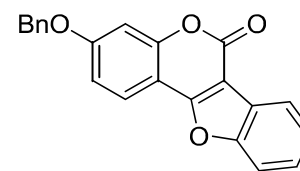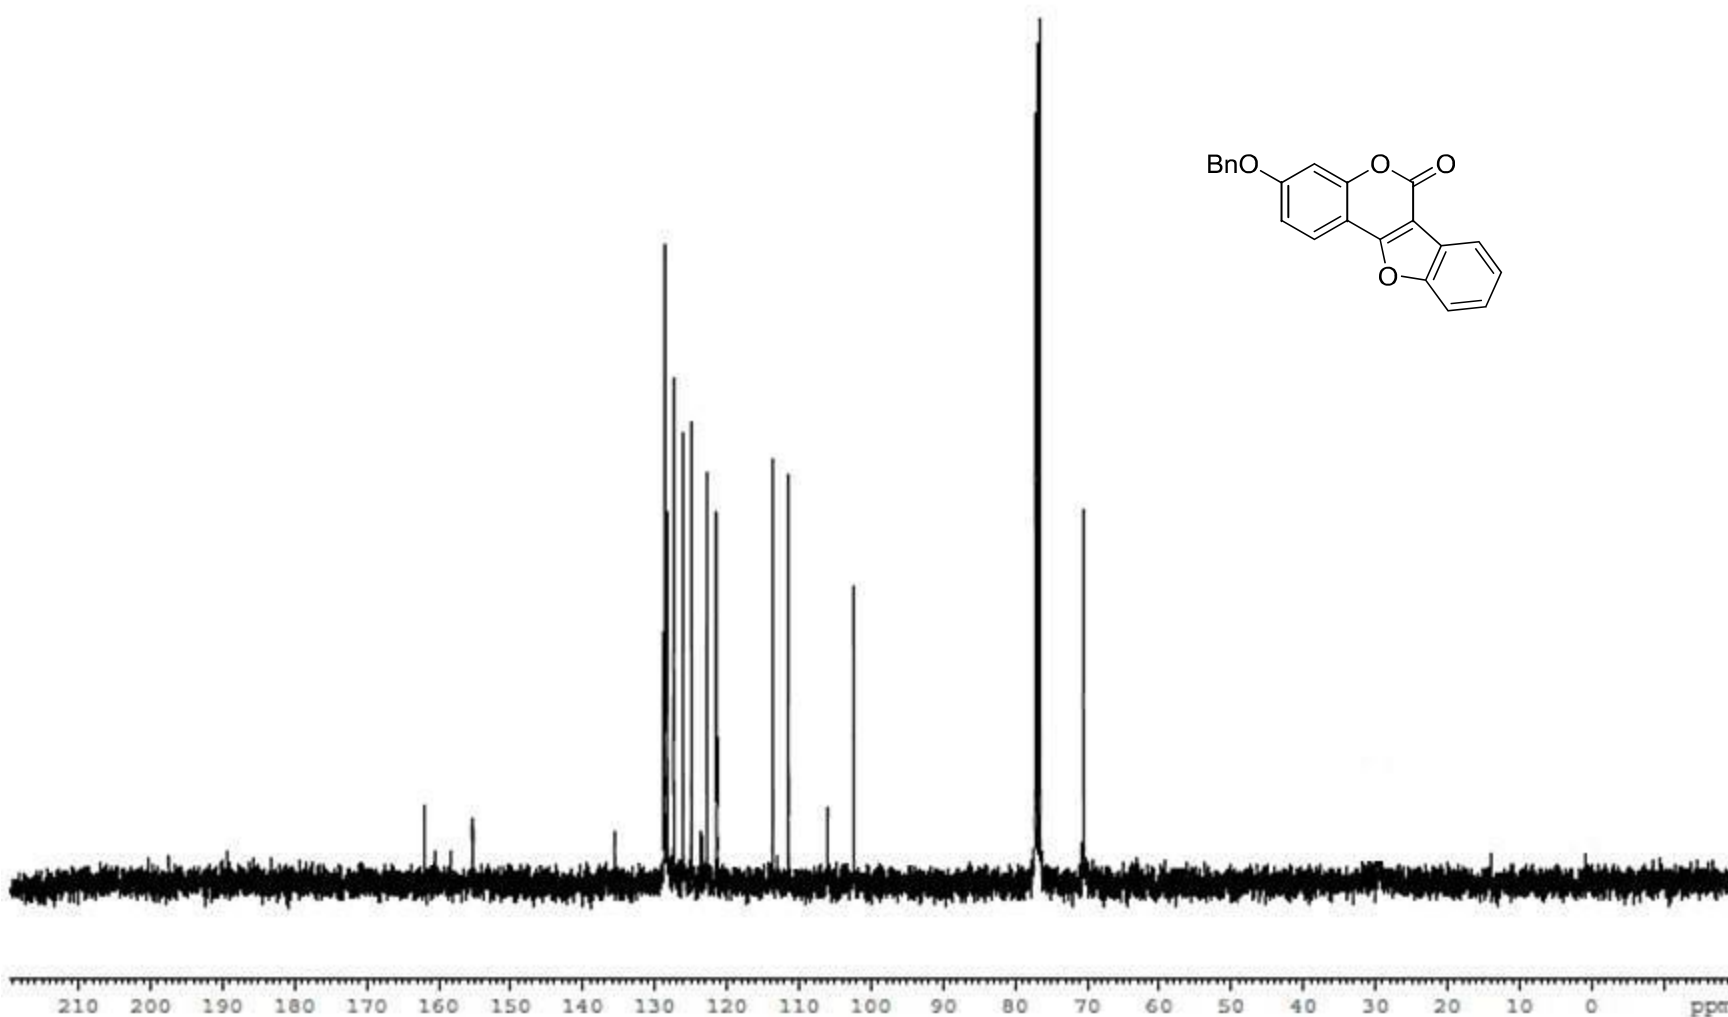

# <sup>1</sup>H of 2-(benzyloxy)-6H-benzofuro[3,2-c]chromen-6-one (4ah)

<sup>1</sup>H of NP-IM-4AH

29.8.2017

8.125  
8.119  
8.108  
8.103  
7.648  
7.645  
7.627  
7.498  
7.480  
7.472  
7.465  
7.449  
7.432  
7.412  
7.407  
7.384  
7.375  
7.369  
7.351  
7.259  
7.226  
7.218  
7.203  
7.196

— 5.163

— 1.657

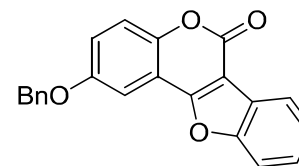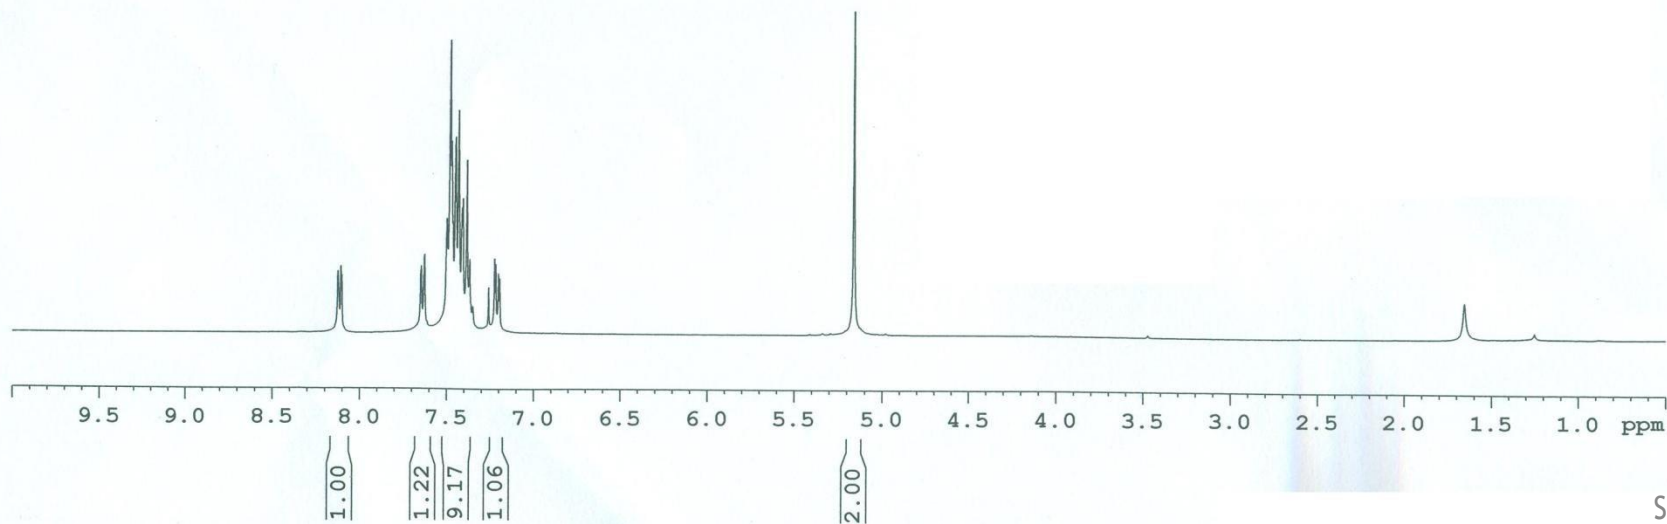

# <sup>13</sup>C of 2-(benzyloxy)-6H-benzofuro[3,2-c]chromen-6-one(4ah)

<sup>13</sup>C of NP-IM-P-OBncypdt 22.3.2017

159.67  
158.08  
155.34  
155.30  
148.18  
136.05  
128.64  
128.22  
127.49  
126.67  
125.10  
123.36  
121.78  
120.73  
118.62  
112.70  
111.59  
105.88  
104.54  
77.26  
76.94  
76.62  
70.62

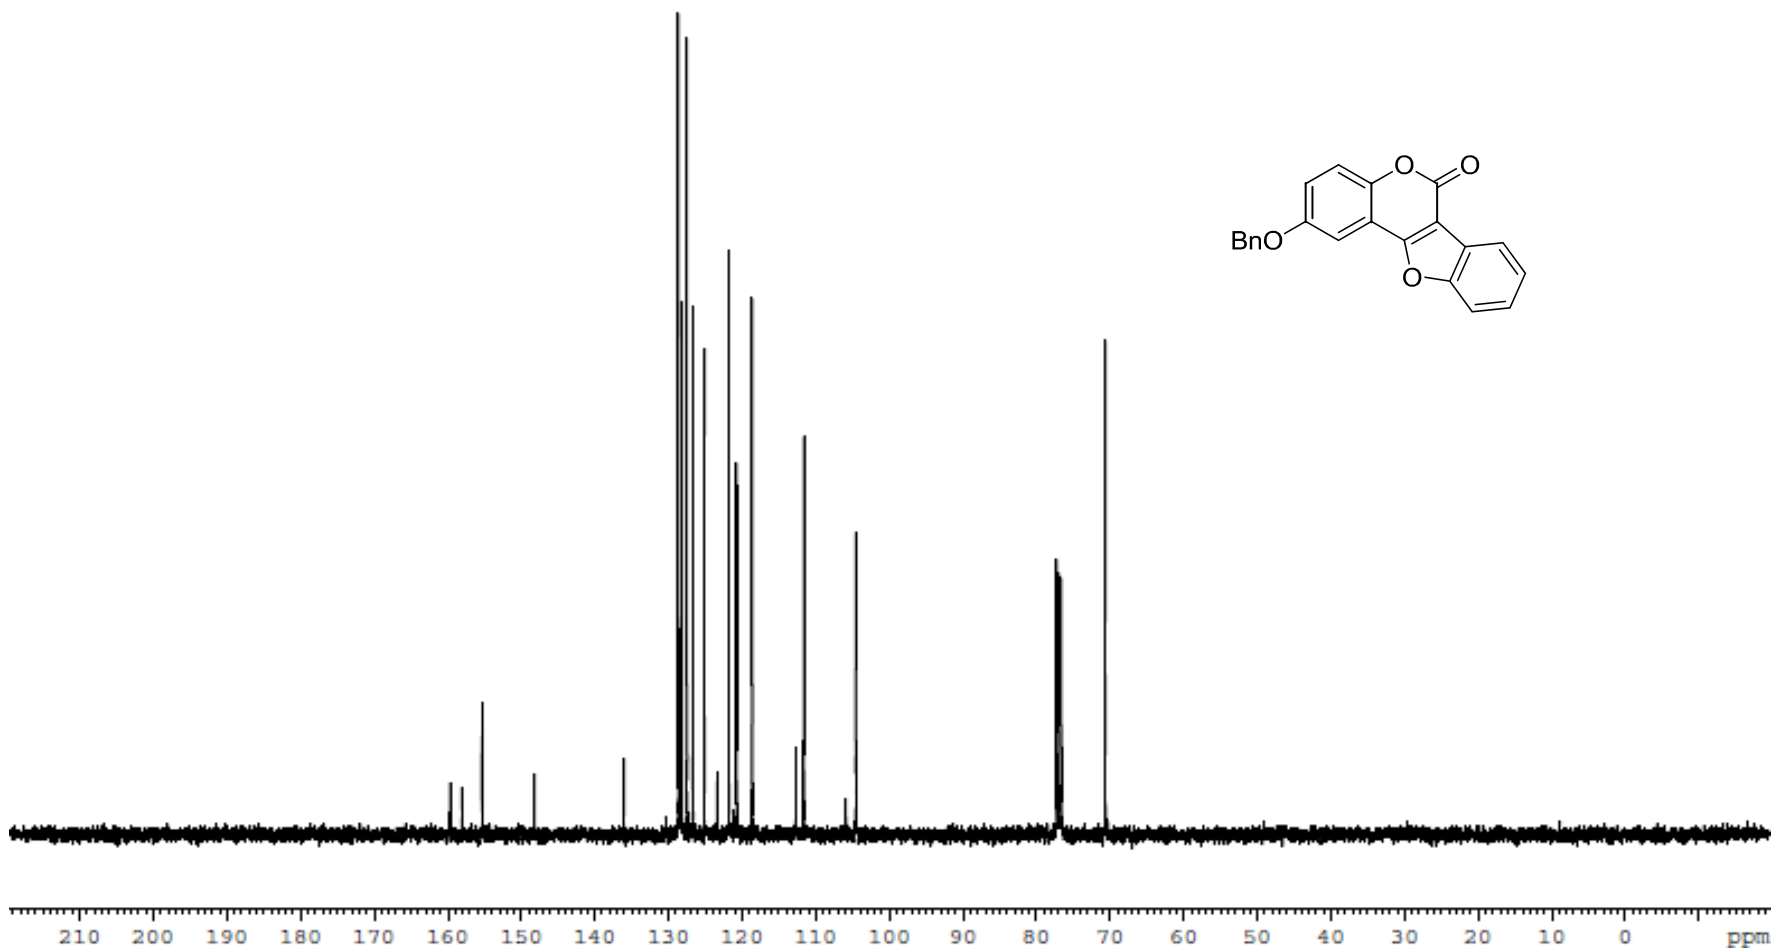

# <sup>1</sup>H of 8H-benzo[h]benzofuro[3,2-c]chromen-8-one (4ai)

<sup>1</sup>H of NP-IM-1203 15.12.2016

8.649  
8.197  
8.192  
8.184  
8.181  
8.174  
8.014  
7.993  
7.926  
7.919  
7.908  
7.903  
7.829  
7.807  
7.712  
7.706  
7.700  
7.692  
7.689  
7.680  
7.675  
7.668  
7.661  
7.657  
7.644  
7.527  
7.514  
7.510  
7.501  
7.491  
7.474  
7.282

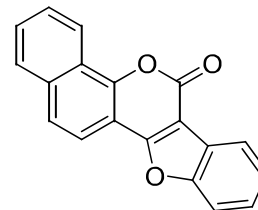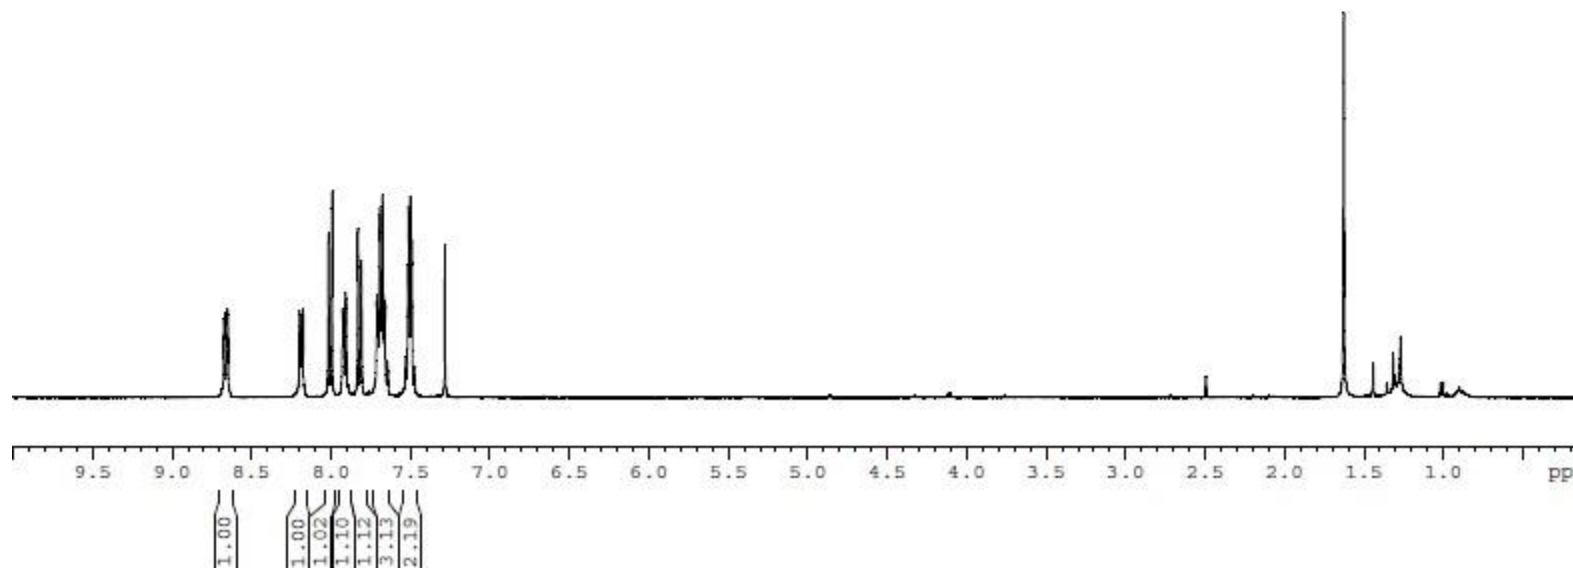

<sup>13</sup>C of 8H-benzo[h]benzofuro[3,2-c]chromen-8-one (4ai)

NP-IM-1213-1-naph 13c 7.2.2017

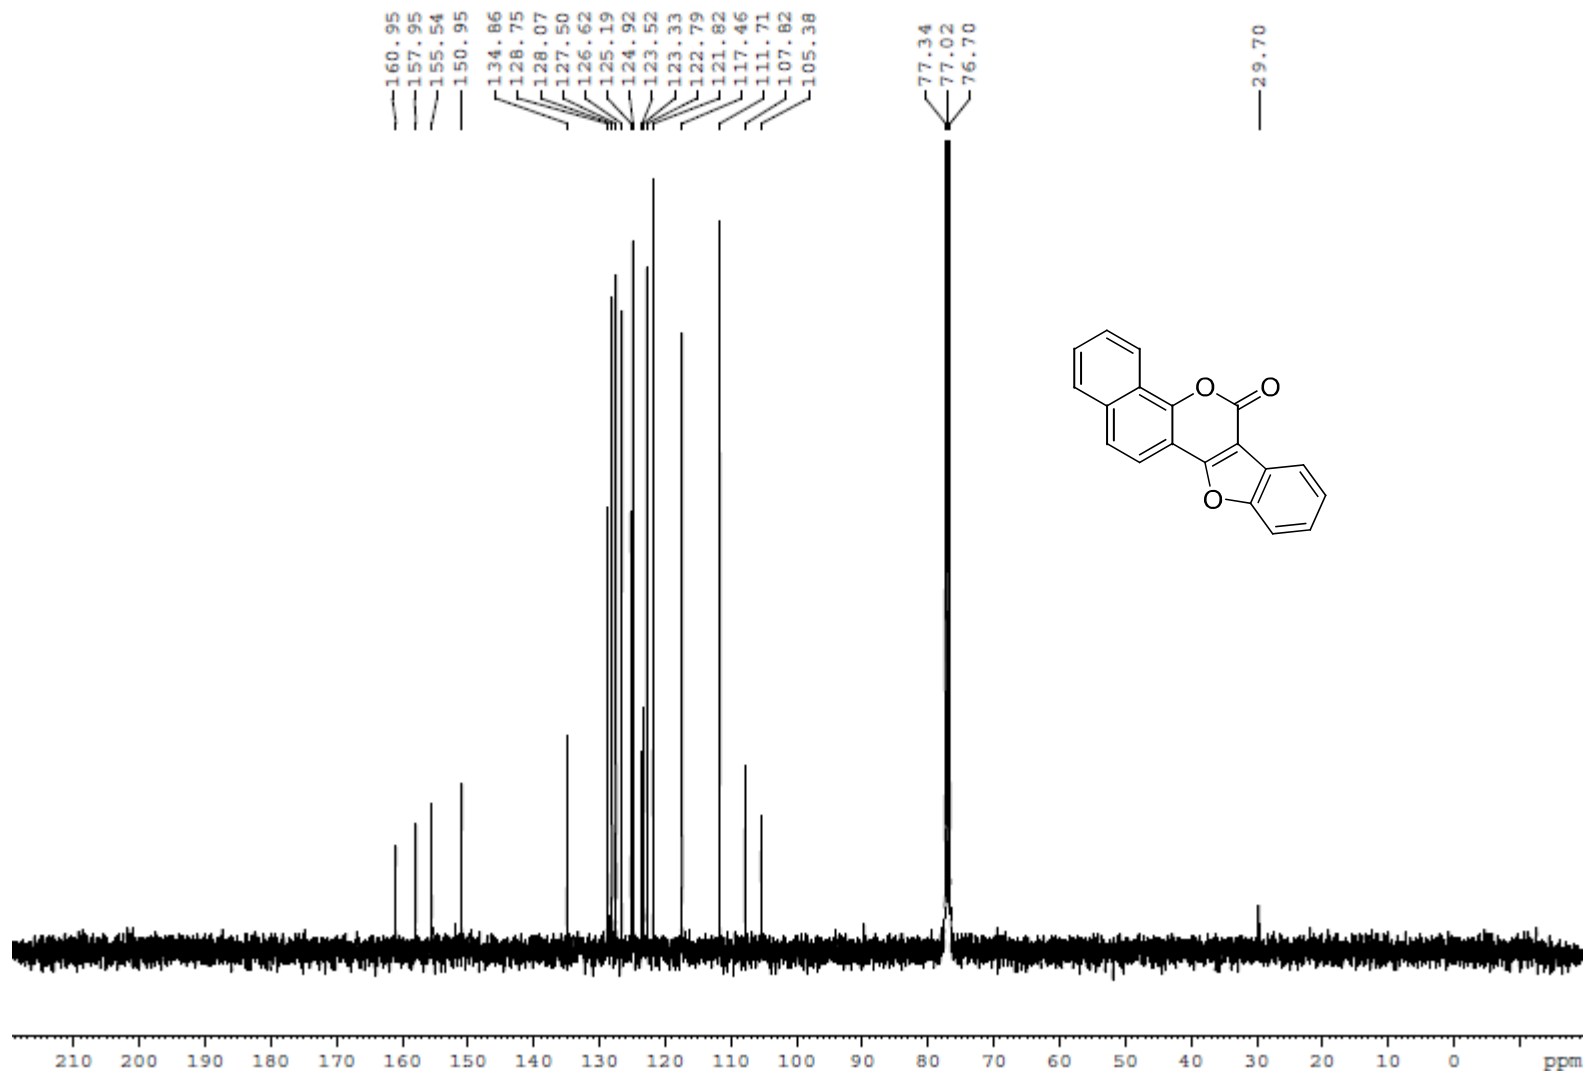

# <sup>1</sup>H of 8H-benzo[*f*]benzofuro[3,2-*c*]chromen-8-one (4aj)

<sup>1</sup>H of NP-IM-4AK

8.226  
8.224  
8.220  
8.210  
8.205  
8.043  
8.021  
7.957  
7.936  
7.821  
7.803  
7.799  
7.786  
7.782  
7.648  
7.645  
7.628  
7.610  
7.605  
7.543  
7.539  
7.529  
7.525  
7.524  
7.519  
7.510  
7.507  
7.260

—1.601

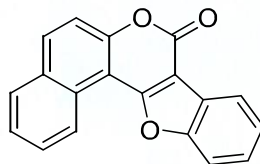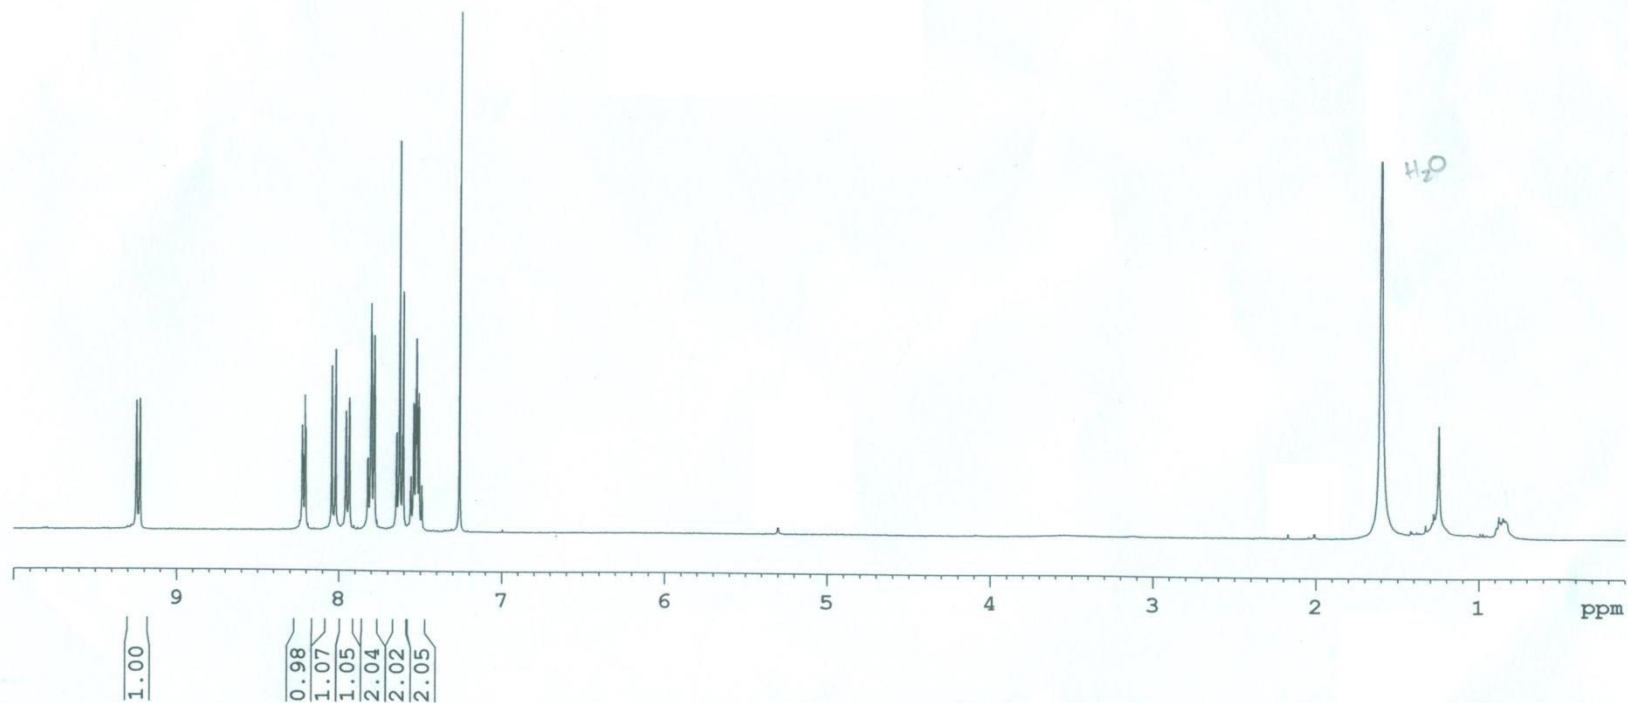



<sup>13</sup>C of 8H-benzo[f]benzofuro[3,2-c]chromen-8-one (4aj)

<sup>13</sup>C of NP-IM-1213(R)

7.2.2017

161.29  
157.95  
155.36  
153.79  
133.02  
130.79  
130.28  
128.70  
127.42  
126.63  
126.28  
125.42  
125.23  
122.78  
121.75  
117.30  
111.60  
107.03  
106.03  
77.21  
76.89  
76.58

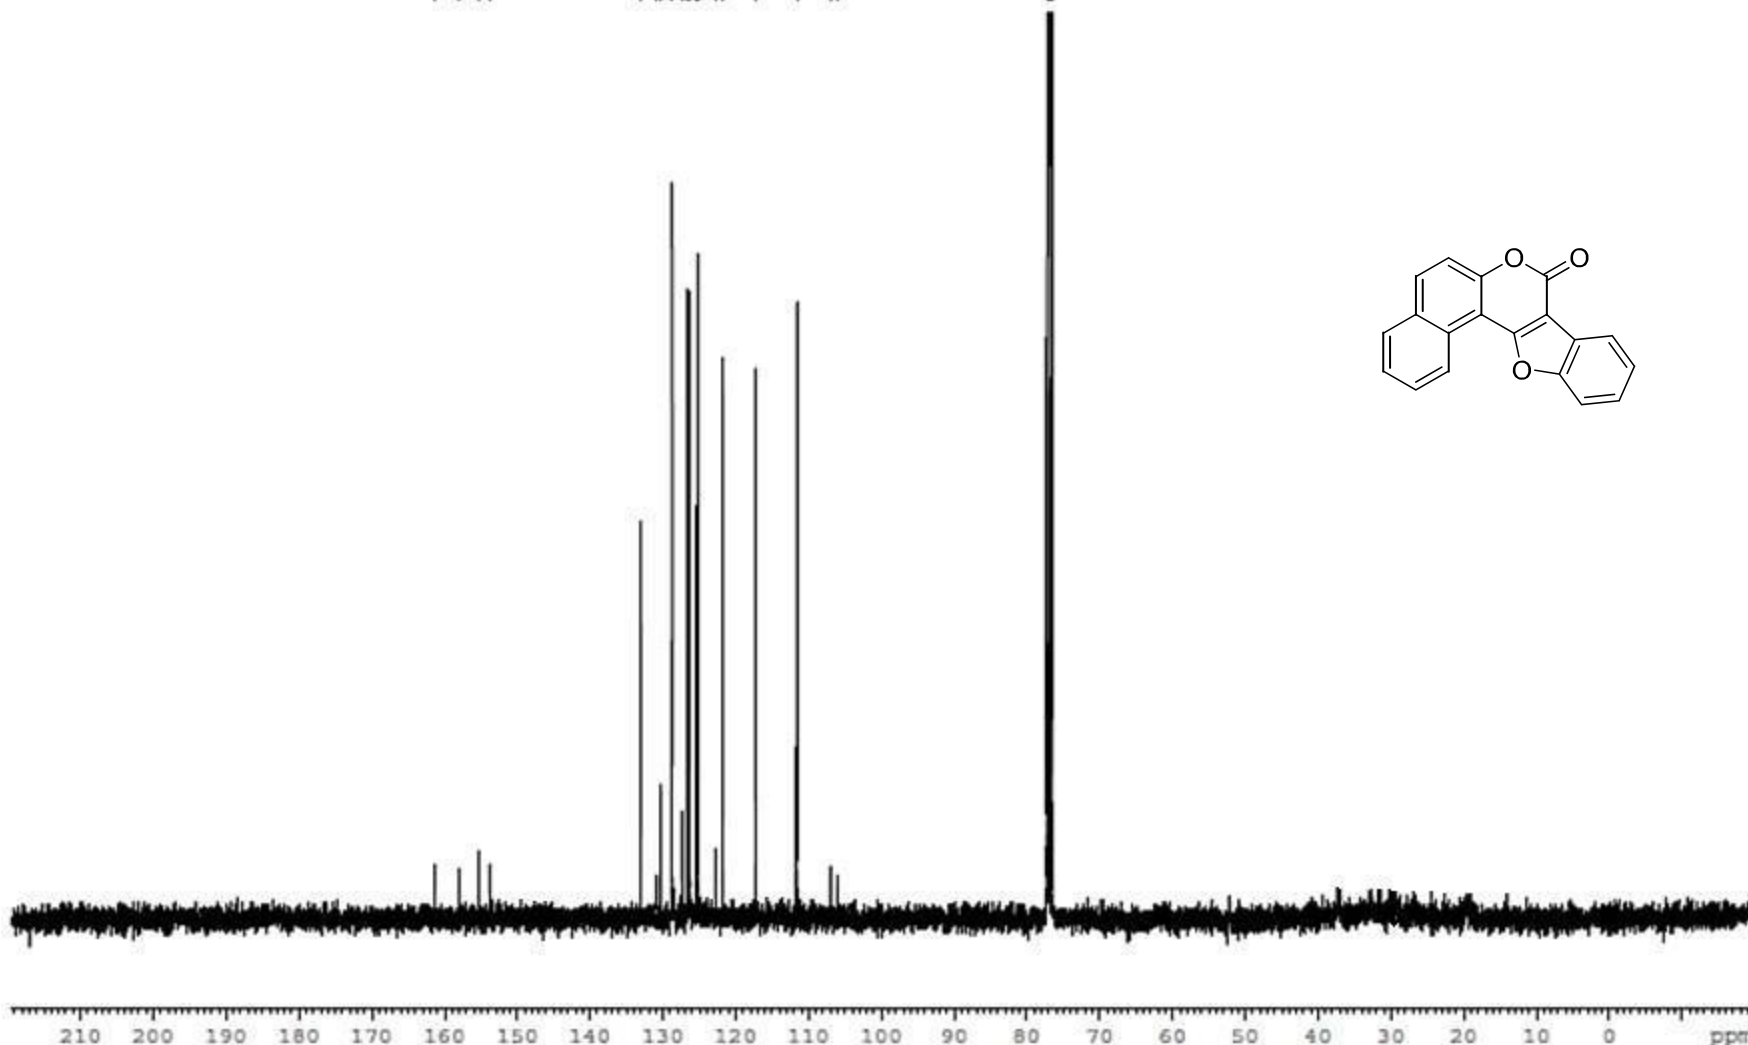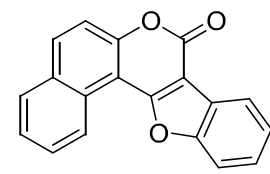

# <sup>1</sup>H of 8-methyl-6H-benzofuro[3,2-c]chromen-6-one (4ba)

<sup>1</sup>H of NP-IM-1325

29.3.2017

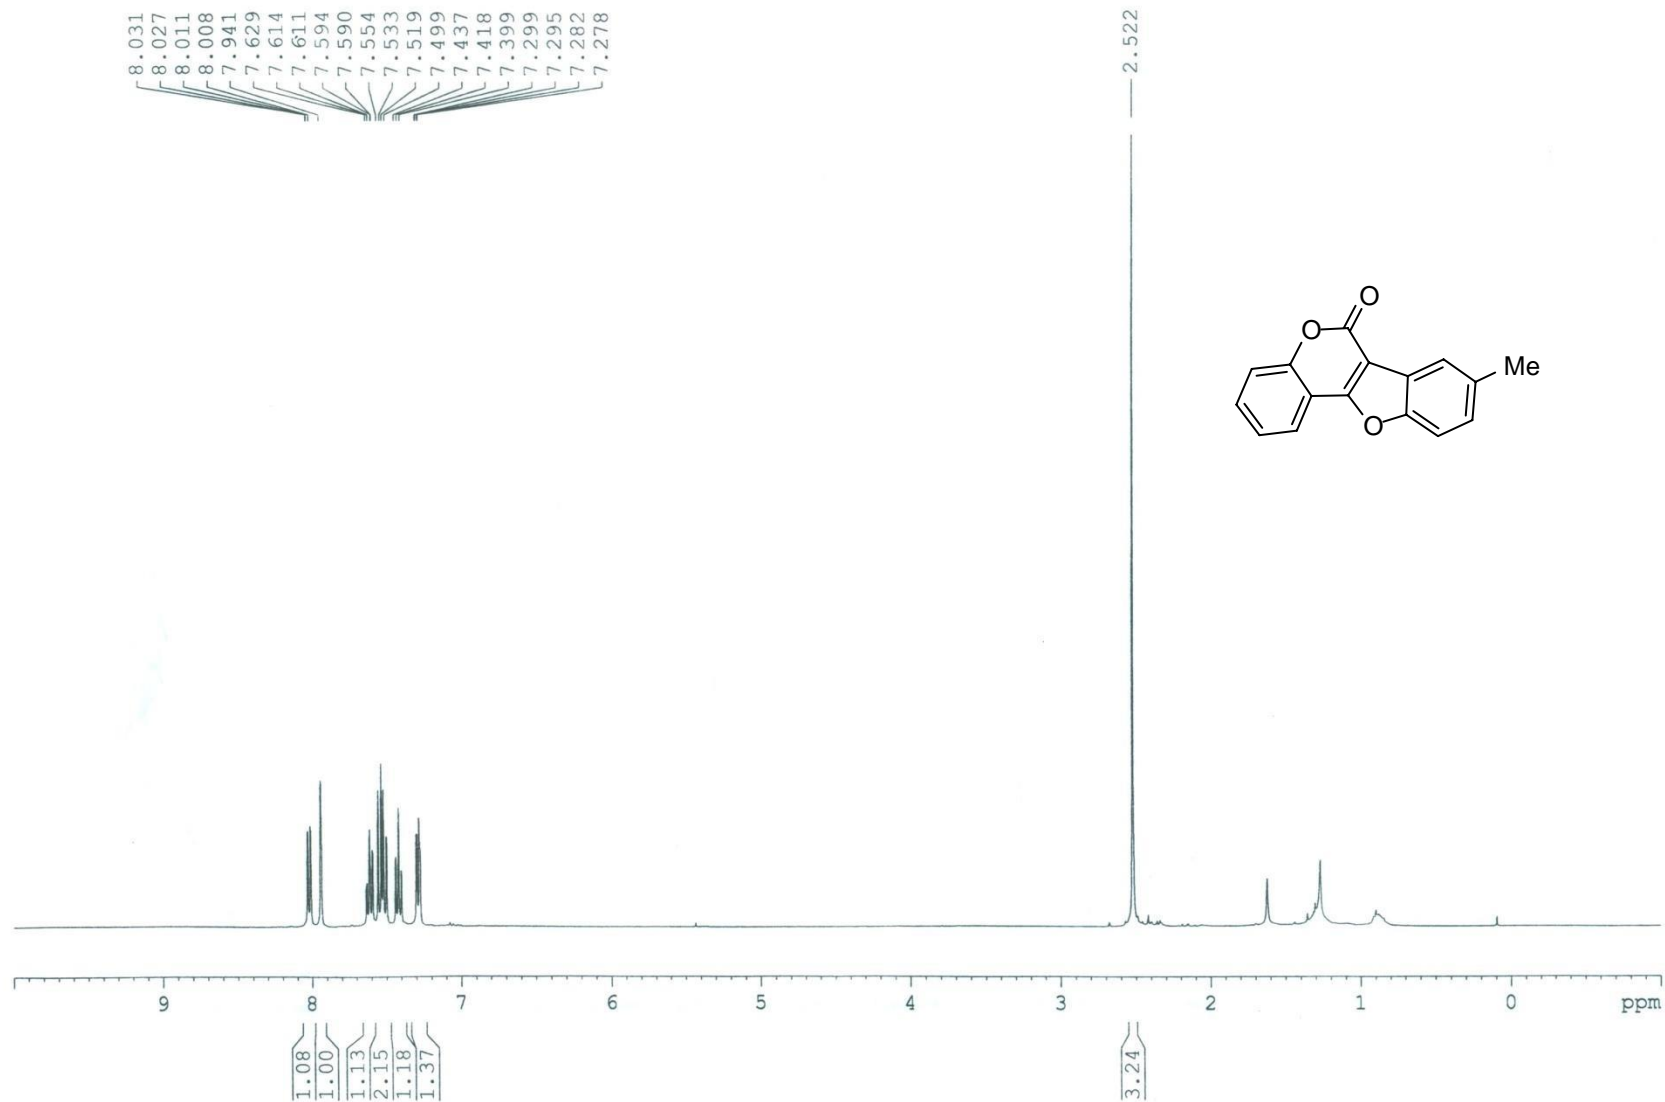

<sup>13</sup>C of 8-methyl-6H-benzofuro[3,2-c]chromen-6-one (4ba)

13C of NP-IM-1325 29.3.2017

159.92  
158.08  
153.87  
153.48

135.03  
131.63  
127.80  
124.47  
123.31  
121.69  
121.56  
117.34  
112.65  
111.07  
105.56

77.22  
76.90  
76.59

29.59

21.22

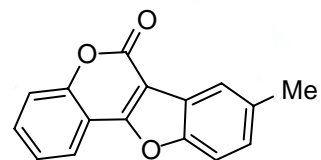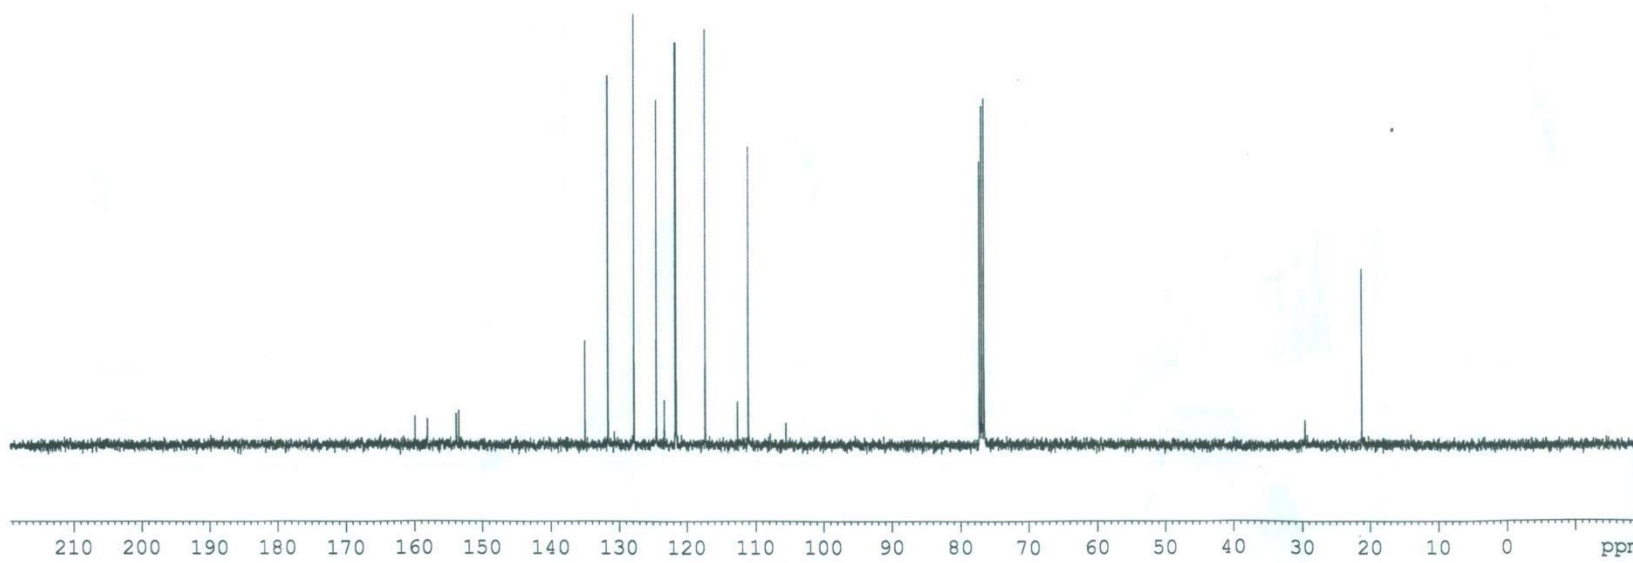

# <sup>1</sup>H of 9-methoxy-6*H*-benzofuro[3,2-*c*]chromen-6-one (4da)

1H of NP-IM-4DA

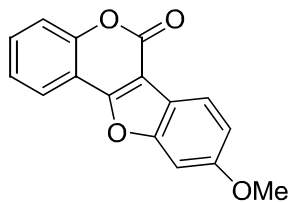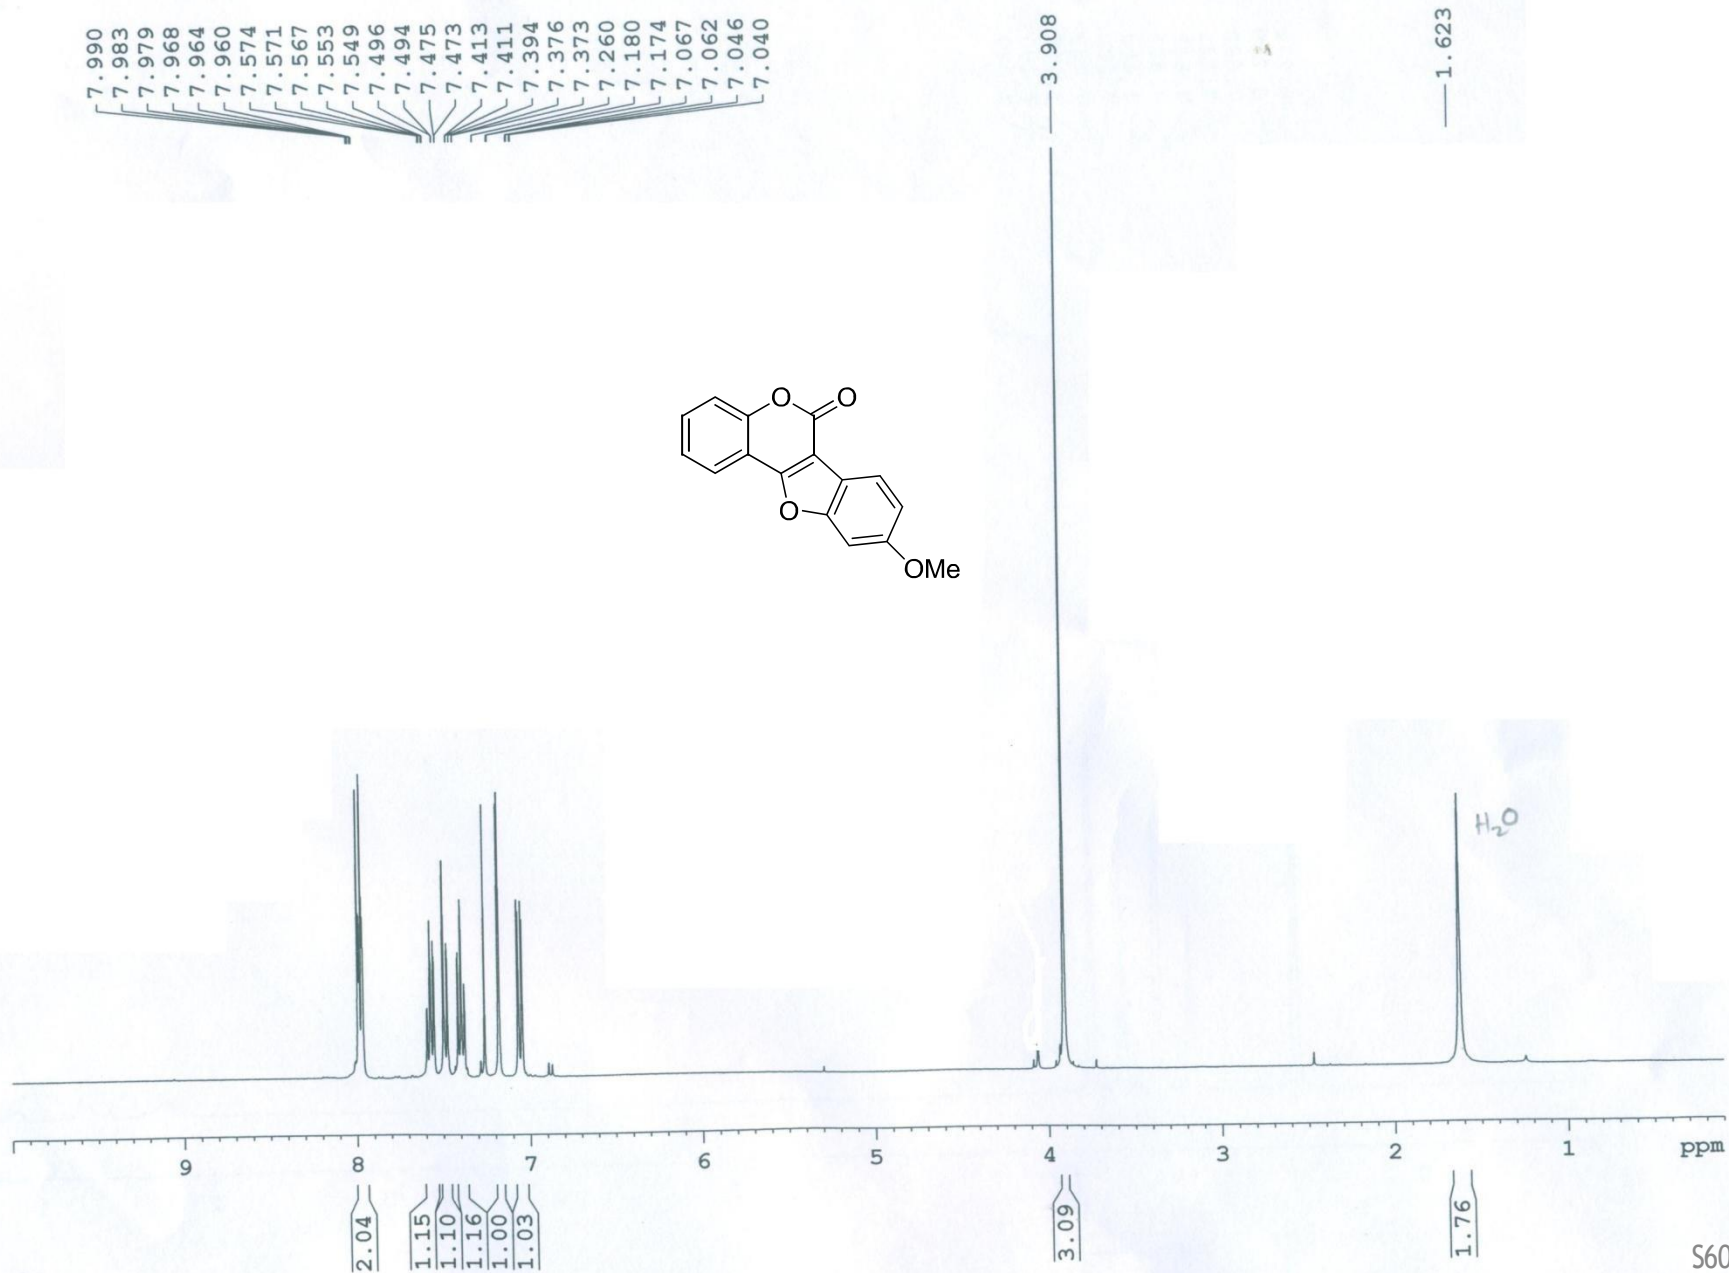

# <sup>13</sup>C of 9-methoxy-6H-benzofuro[3,2-c]chromen-6-one (4da)

24.3.2017

13C of NP-IM-132

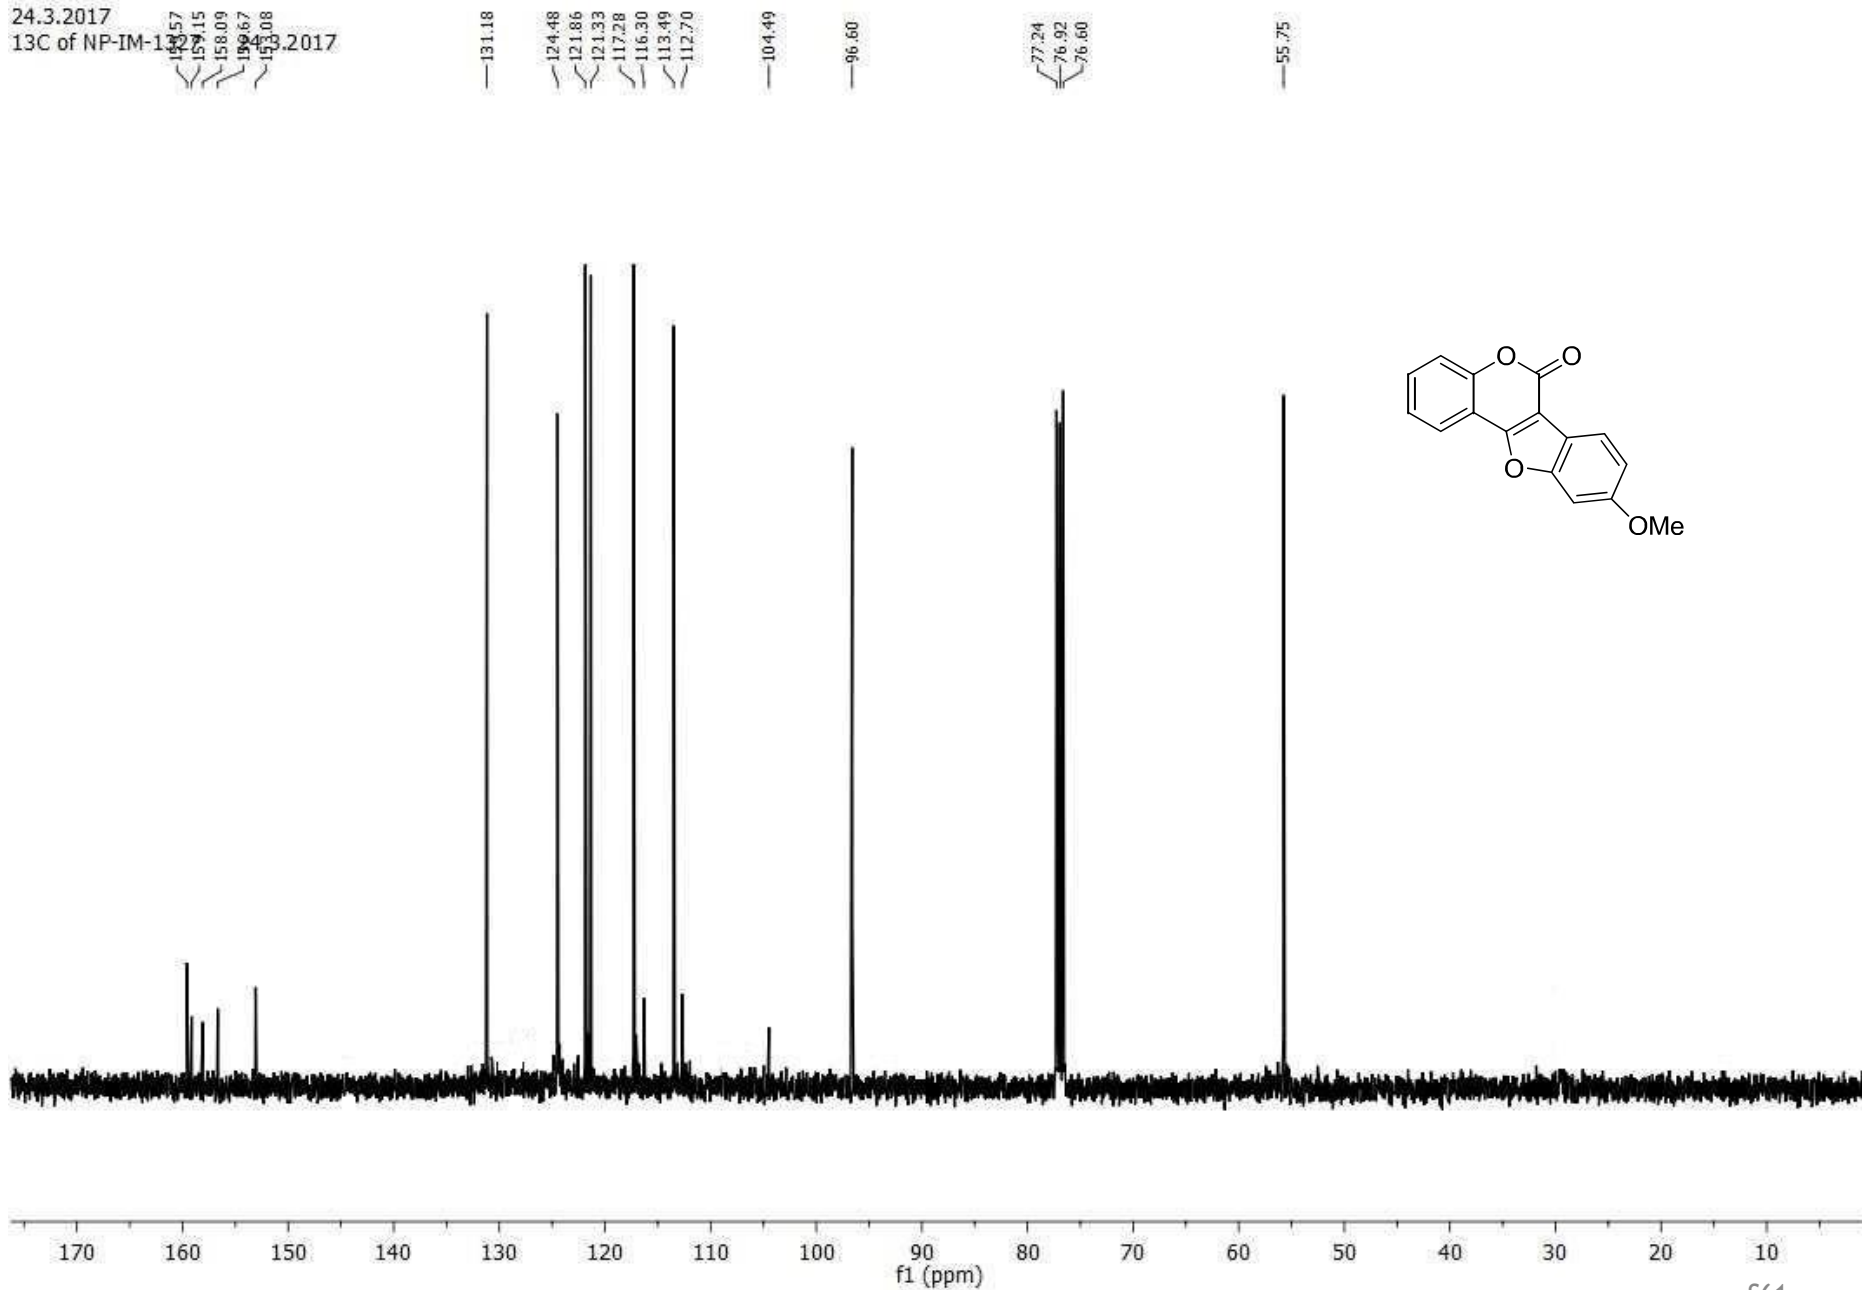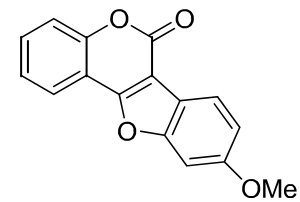

# <sup>1</sup>H of 9-(benzyloxy)-6*H*-benzofuro[3,2-*c*]chromen-6-one (4ea)

<sup>1</sup>H of NP-IM-4EA

8.006  
7.984  
7.963  
7.592  
7.572  
7.554  
7.494  
7.474  
7.440  
7.422  
7.406  
7.377  
7.361  
7.342  
7.258  
7.247  
7.157  
7.135

— 5.163

— 1.615

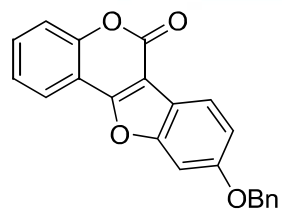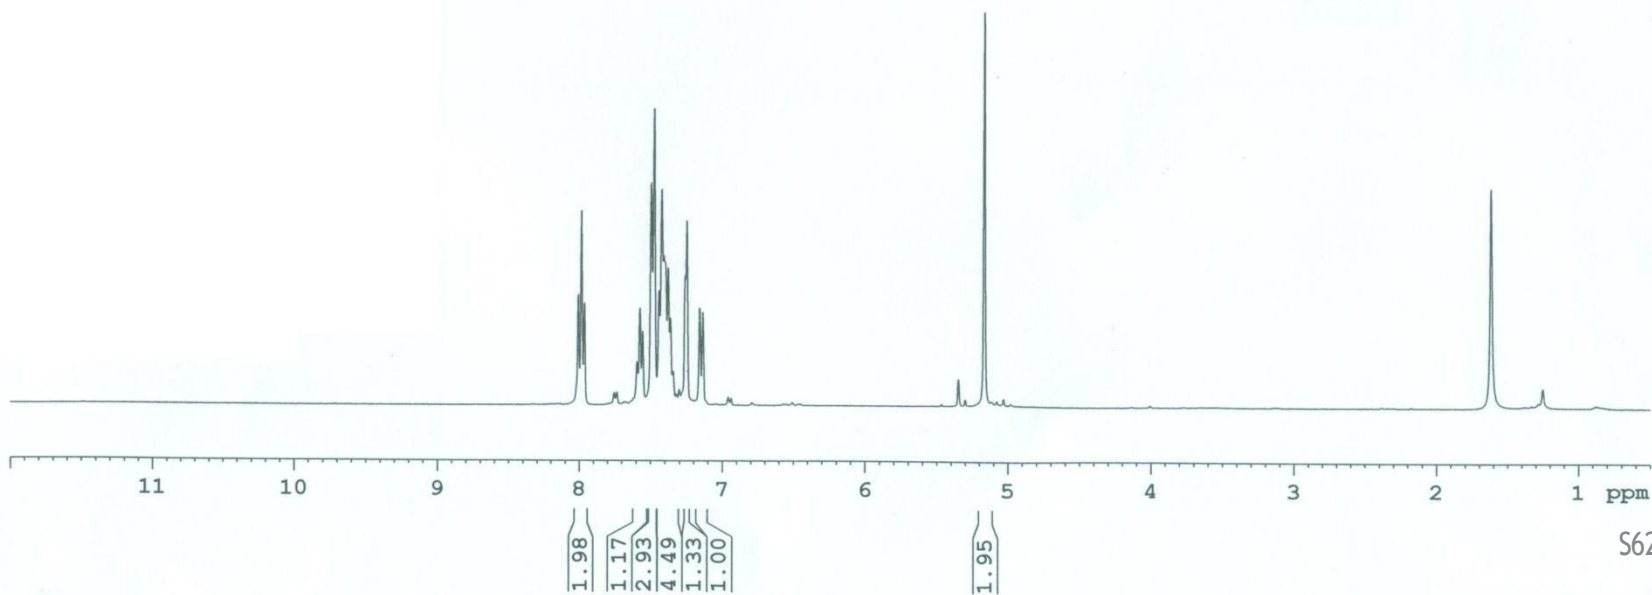

# <sup>13</sup>C of 9-(benzyloxy)-6H-benzofuro[3,2-c]chromen-6-one (4da)

24.3.2017

13 C of NP-IM-132

24.3.2017

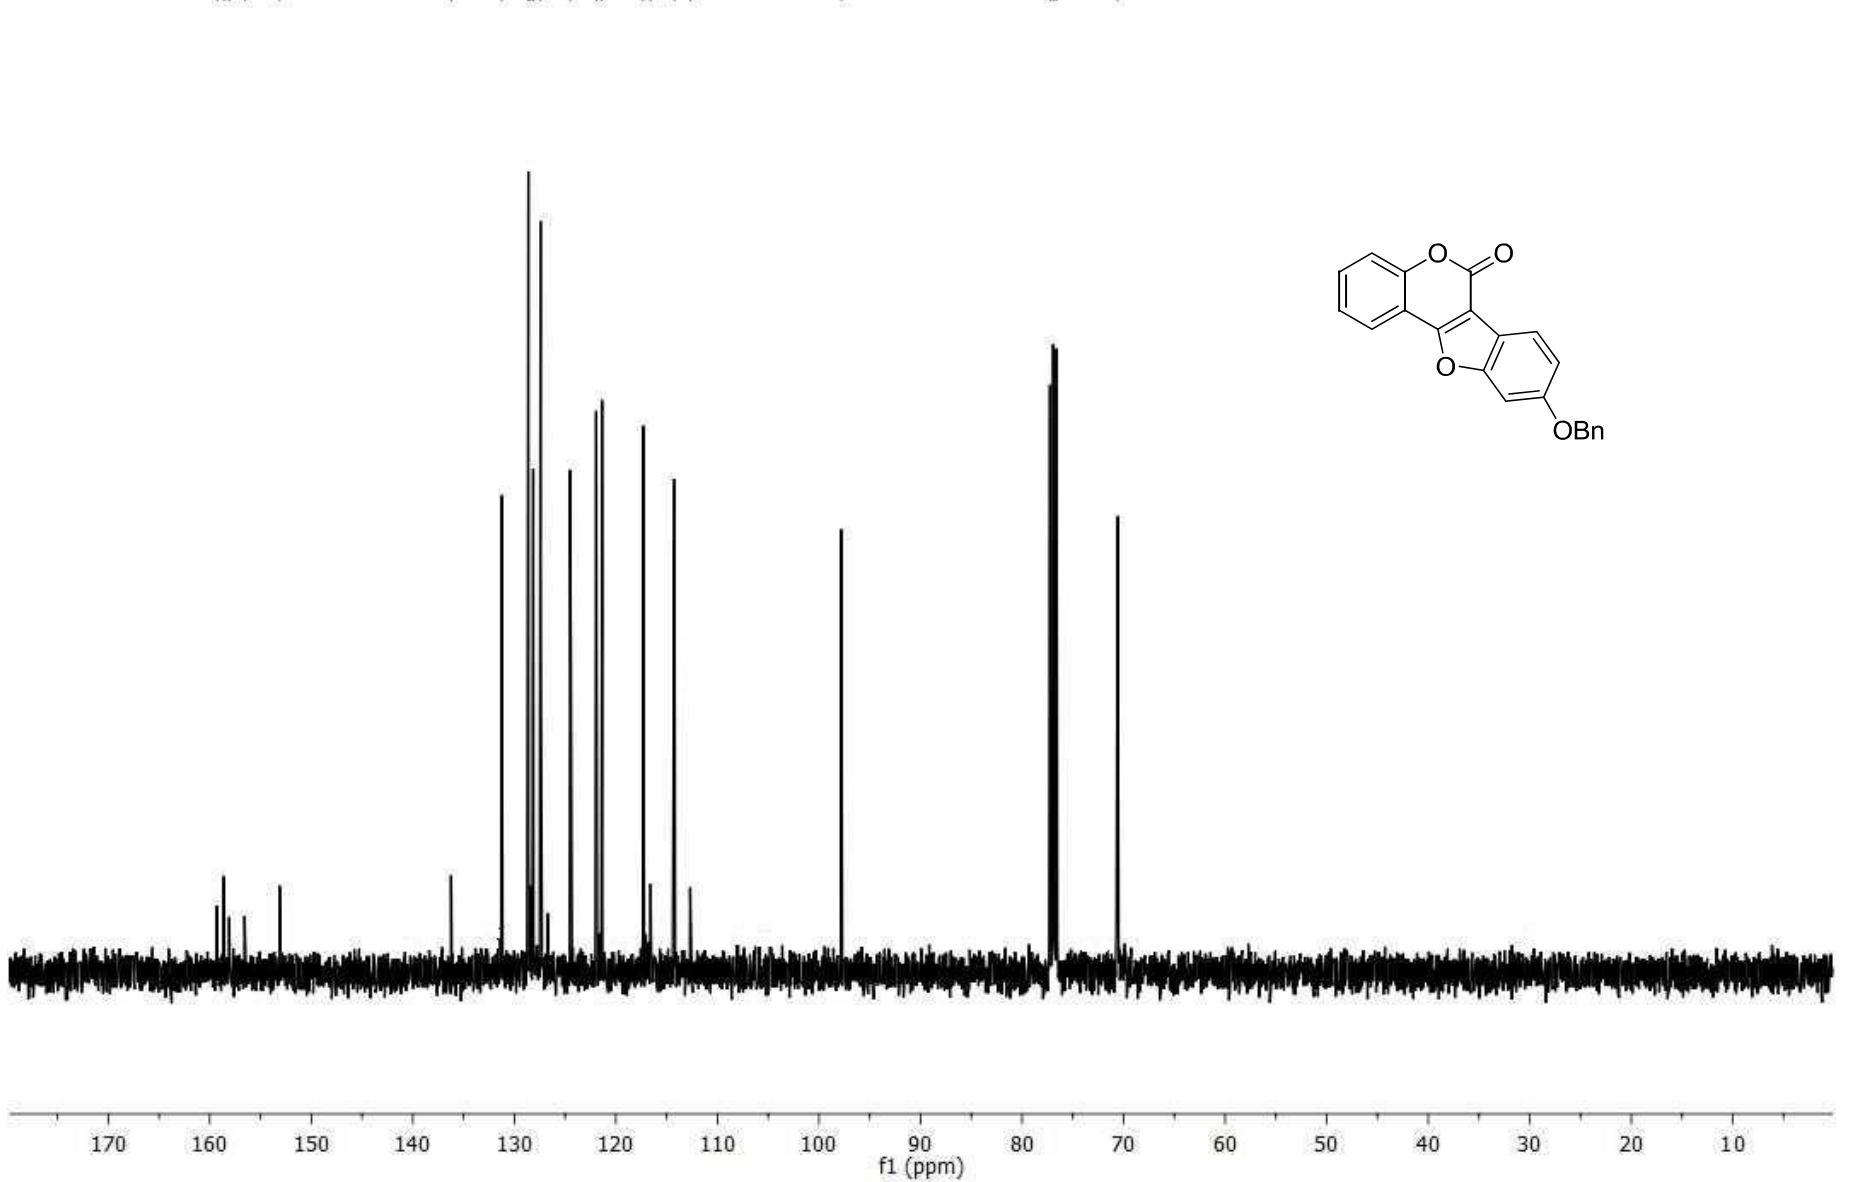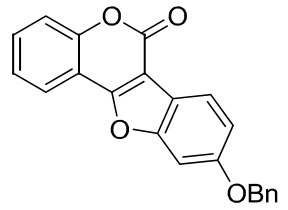

# <sup>1</sup>H NMR of 4-phenoxy-2H-chromen-2-one (5aa)

<sup>1</sup>H of NP-IM-1027

15.6.2016

7.582  
7.517  
7.497  
7.386  
7.370  
7.368  
7.352  
7.332  
7.282  
7.234  
7.215  
7.197  
7.143  
7.125  
7.107

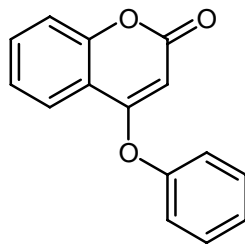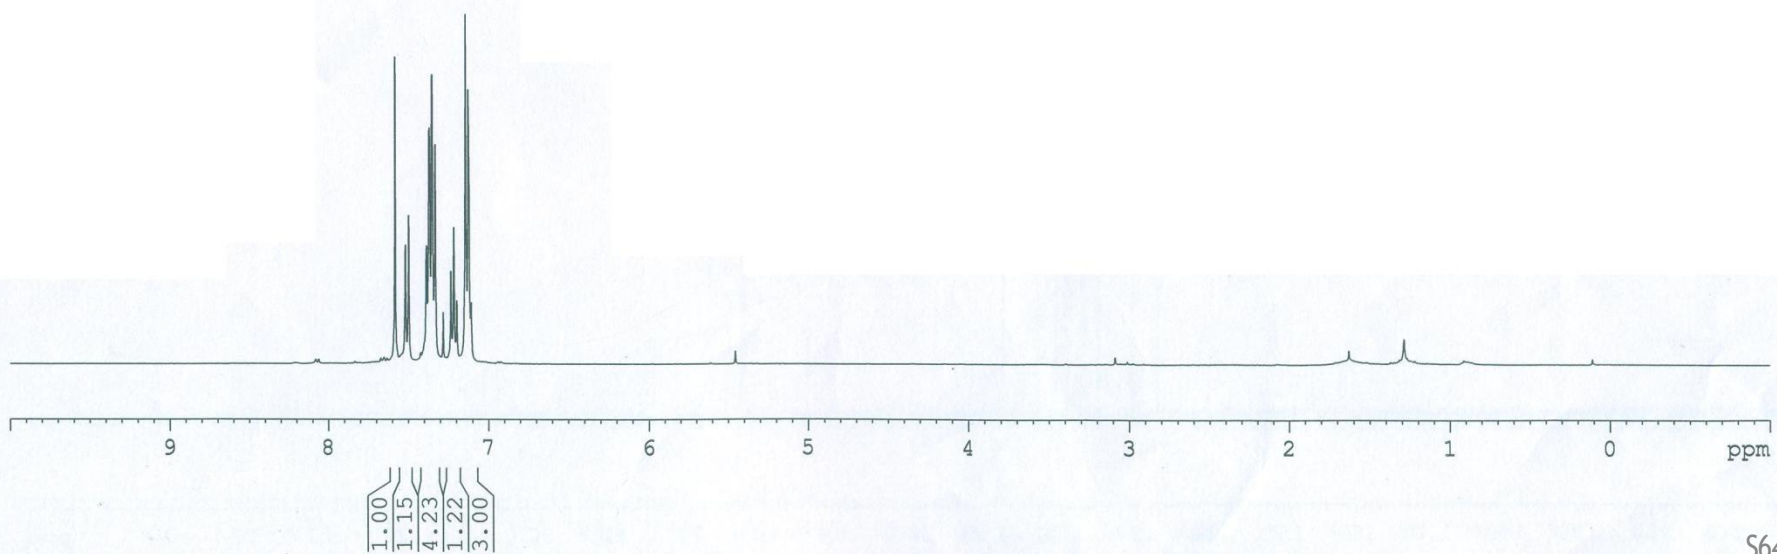



# <sup>13</sup>C NMR of 4-phenoxy-2H-chromen-2-one (5aa)

<sup>13</sup>C of NP-IM-1027

— 157.63  
— 154.05

— 139.87  
— 132.97  
— 129.66  
— 124.98  
— 123.10  
— 122.62  
— 122.04  
— 119.28  
— 116.73  
— 112.10

— 77.35  
— 77.03  
— 76.71

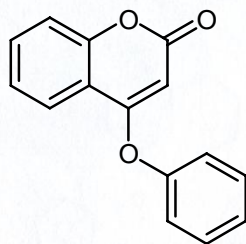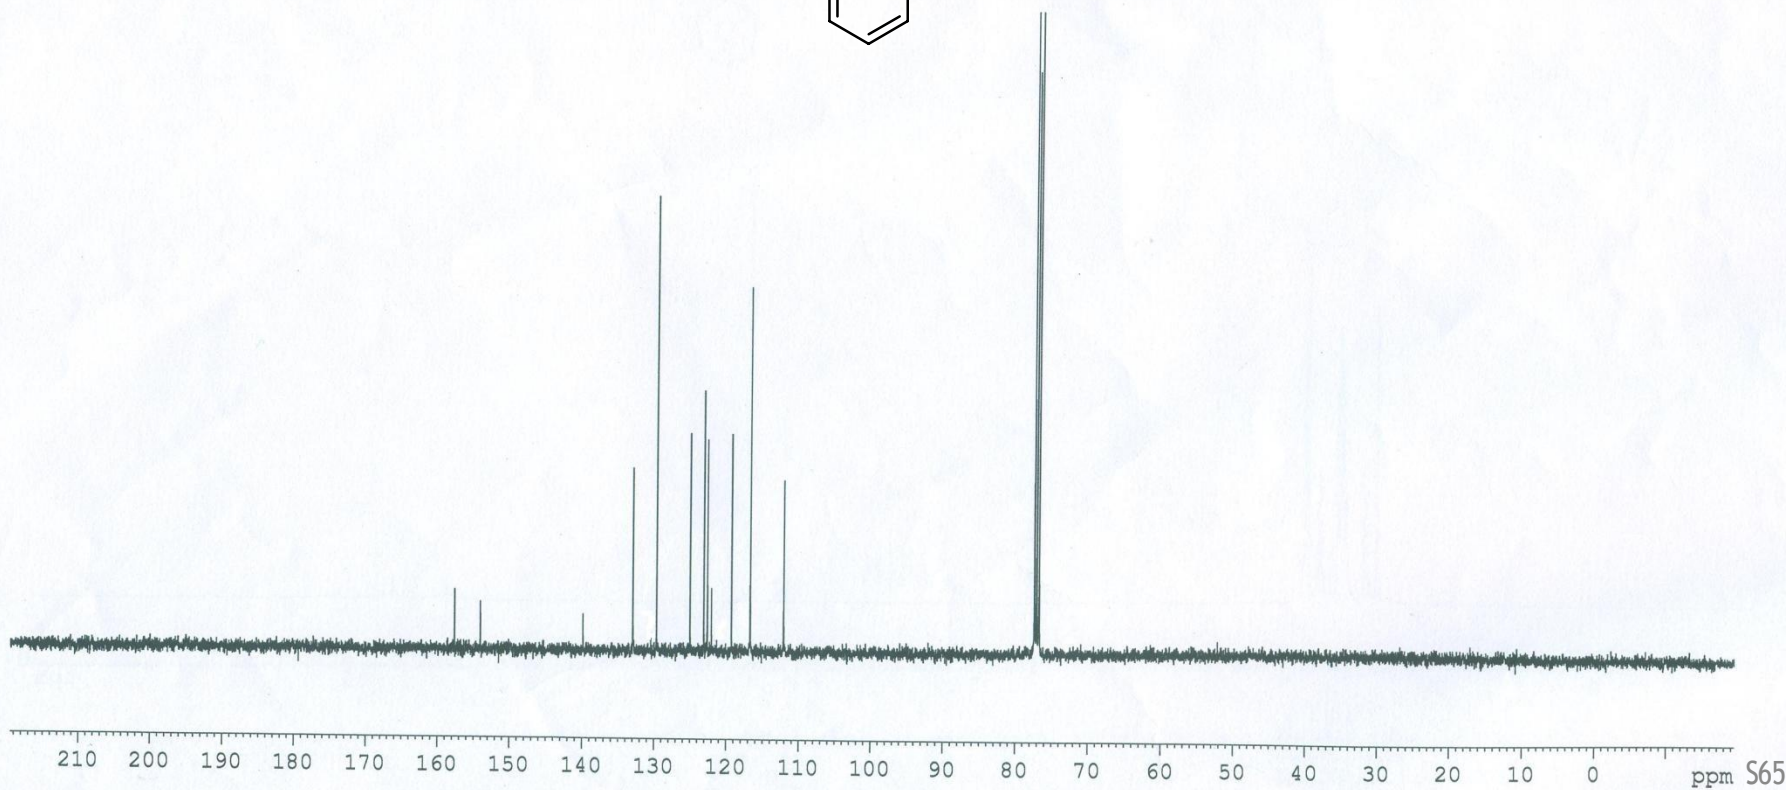

Supplement: RA-008-C7RA12419H-s001.pdf [file RA-008-C7RA12419H-s001.pdf]
